# Supplementary material for: Thermoresponsive properties of polyacrylamides in physiological solutions
Source: Royal Society of Chemistry journal article supplement (doi:10.1039/d1py00843a), 2021-01-01
Supplement: d1py00843a2.pdf [file d1py00843a2.pdf]

## ELECTRONIC SUPPORTING INFORMATION

### OF THE ARTICLE

## THERMORESPONSIVE PROPERTIES OF POLYACRYLAMIDES IN PHYSIOLOGICAL SOLUTIONS

*Kristýna Kolouchová,<sup>1</sup> Volodymyr Lobaz,<sup>1</sup> Hynek Beneš,<sup>1</sup> Victor R. de la Rosa,<sup>2,3</sup> David Babuka,<sup>1,4</sup>  
Pavel Švec,<sup>1,5</sup> Peter Černoch,<sup>1</sup> Martin Hrubý,<sup>1</sup> Richard Hoogenboom,<sup>2,\*</sup> Petr Štěpánek,<sup>1</sup>  
and Ondřej Groborz<sup>1,6,7,\*</sup>*

<sup>1</sup>Institute of Macromolecular Chemistry, Czech Academy of Sciences,  
Heyrovsky square 2, 162 06 Prague 6, Czech Republic

<sup>2</sup>Department of Organic and Macromolecular Chemistry, Ghent University,  
Krijgslaan 281-S4, 9000 Ghent, Belgium

<sup>3</sup>AVROXA BV, Technologiepark-Zwijnaarde 82, B-9052 Ghent, Belgium

<sup>4</sup>Department of Biophysics, Institute of Physics, Faculty of Mathematics and Physics, Charles  
University, Ke Karlovu 3, Prague 2, 121 16, Czech Republic

<sup>5</sup>Department of Physical and Macromolecular Chemistry, Faculty of Science, Charles University,  
Hlavova 8, Prague 2, 128 00, Czech Republic

<sup>6</sup>Institute of Biophysics and Informatics, Charles University, First Faculty of Medicine,  
Salmovská 1, 120 00 Prague 2, Czech Republic

<sup>7</sup>Department of Organic and Medicinal Chemistry, Charles University, Faculty of Science,  
Hlavova 8, 128 43 Prague 2, Czech Republic

\*corresponding authors: O. Groborz: [ondrej.groborz@seznam.cz](mailto:ondrej.groborz@seznam.cz), [richard.hoogenboom@ugent.be](mailto:richard.hoogenboom@ugent.be)

**Table of Content – List of Chapters**

|                                                                                                                                                          |    |
|----------------------------------------------------------------------------------------------------------------------------------------------------------|----|
| Table of Content – List of Schemes .....                                                                                                                 | 3  |
| Table of Content – List of Tables.....                                                                                                                   | 3  |
| Table of Content – List of Figures .....                                                                                                                 | 3  |
| S1. Materials .....                                                                                                                                      | 5  |
| S2. Experimental.....                                                                                                                                    | 5  |
| S2.1. Monomer synthesis .....                                                                                                                            | 5  |
| S2.2. Polymer synthesis .....                                                                                                                            | 6  |
| S2.3. NMR spectroscopy .....                                                                                                                             | 7  |
| S2.4. Size exclusion chromatography .....                                                                                                                | 7  |
| S2.5. Turbidimetry .....                                                                                                                                 | 8  |
| S2.6. Refractive index increment ( $dn/dc$ ).....                                                                                                        | 8  |
| S2.7. Dynamic light scattering (DLS).....                                                                                                                | 8  |
| S2.8. Isothermal titration calorimetry.....                                                                                                              | 8  |
| S2.9. Data processing.....                                                                                                                               | 9  |
| S3. NMR spectra.....                                                                                                                                     | 10 |
| S3.1. <i>N</i> -acryloylpyrrolidine ( $^1\text{H}$ , $^{13}\text{C}$ , $^1\text{H}$ - $^{13}\text{C}$ HSQC-edit) .....                                   | 10 |
| S3.2. <i>N</i> -(2,2-difluoroethyl)acrylamide ( $^1\text{H}$ , $^{13}\text{C}$ , $^{19}\text{F}$ , $^1\text{H}$ - $^{13}\text{C}$ HSQC-edit).....        | 13 |
| S3.3. Poly[( <i>N</i> -2,2-difluoroethyl)acrylamide] ( $^1\text{H}$ , $^{13}\text{C}$ , $^{19}\text{F}$ , $^1\text{H}$ - $^{13}\text{C}$ HSQC-edit)..... | 17 |
| S3.4. Poly[( <i>N</i> -isopropyl)acrylamide] ( $^1\text{H}$ , $^{13}\text{C}$ , $^1\text{H}$ - $^{13}\text{C}$ HSQC-edit).....                           | 21 |
| S3.5. Poly[( <i>N,N</i> -diethyl)acrylamide] ( $^1\text{H}$ , $^{13}\text{C}$ , $^1\text{H}$ - $^{13}\text{C}$ HSQC-edit).....                           | 24 |
| S3.6. Poly[( <i>N</i> -acryloyl)pyrrolidine] ( $^1\text{H}$ , $^{13}\text{C}$ , $^1\text{H}$ - $^{13}\text{C}$ HSQC-edit).....                           | 27 |
| S4. Size exclusion chromatograms (SEC traces).....                                                                                                       | 30 |
| S5. Turbidimetric data – tables .....                                                                                                                    | 32 |
| S6. Turbidimetric data .....                                                                                                                             | 34 |
| S7. Isothermal titration calorimetry .....                                                                                                               | 40 |
| S7.1. ITC – <b>F3</b> , <b>I3</b> , <b>E3</b> , and <b>P3</b> polymer titration.....                                                                     | 40 |
| S7.2. ITC – <b>F3</b> , <b>I3</b> , <b>E3</b> , and <b>P3</b> enthalpy.....                                                                              | 48 |
| S7.3. ITC – <b>benzoic acid</b> titration.....                                                                                                           | 49 |
| S7.3. ITC – <b>F1</b> and <b>F2</b> polymer titration.....                                                                                               | 51 |
| S7.4. ITC – <b>F1</b> , <b>F2</b> , and <b>F3</b> enthalpy .....                                                                                         | 55 |
| S8. Dynamic light scattering data .....                                                                                                                  | 57 |
| S9. Refractive index increment ( $dn/dc$ ).....                                                                                                          | 70 |
| S10. Additional information .....                                                                                                                        | 82 |
| S10.1. Heating/cooling cycles of turbidimetry .....                                                                                                      | 82 |
| S10.2. Structure-to-properties relationship.....                                                                                                         | 82 |
| S10.3. Terminal moiety detection .....                                                                                                                   | 84 |
| S11. List of abbreviations and symbols.....                                                                                                              | 85 |
| S12. Author contributions and Contributor Roles Taxonomy (CRediT) .....                                                                                  | 88 |
| S12.1. Contributor Roles Taxonomy (CRediT).....                                                                                                          | 88 |
| S12.2. Author contributions.....                                                                                                                         | 88 |
| S13. Additional supplementary files .....                                                                                                                | 89 |
| S14. References .....                                                                                                                                    | 90 |

**Table of Content – List of Schemes**

|                                                                                                         |    |
|---------------------------------------------------------------------------------------------------------|----|
| Scheme S1. ( <i>N</i> -acryloyl)pyrrolidine and <i>N</i> -(2,2-difluoroethyl)acrylamide synthesis ..... | 5  |
| Scheme S2. Hydrogen bond acceptors, donors, and hydrophobic moieties .....                              | 82 |
| Scheme S3. Polymer thermodynamic map .....                                                              | 83 |

**Table of Content – List of Tables**

|                                                                                                                                |    |
|--------------------------------------------------------------------------------------------------------------------------------|----|
| Table S1. Mass/ molar amount of the monomers used in polymer synthesis.....                                                    | 6  |
| Table S2. Mass/ molar amount of polymers and reactants in subsequent modifications .....                                       | 7  |
| Table S3. <b>pDFEA</b> $T_{CP}$ values in water, PBS and FBS.....                                                              | 32 |
| Table S4. <b>pNIPAM</b> $T_{CP}$ values in water, PBS and FBS .....                                                            | 32 |
| Table S5. <b>pDEA</b> $T_{CP}$ values in water, PBS and FBS .....                                                              | 33 |
| Table S6. <b>pAP</b> $T_{CP}$ values in water, PBS and FBS .....                                                               | 33 |
| Table S7. Thermodynamic parameters of <b>F3</b> , <b>I3</b> , <b>E3</b> , and <b>P3</b> solutions at various temperatures..... | 48 |
| Table S8. Thermodynamic parameters <b>F1</b> and <b>F2</b> solutions at various temperatures.....                              | 56 |

**Table of Content – List of Figures****Nuclear magnetic resonance data**

|                                                                                                        |    |
|--------------------------------------------------------------------------------------------------------|----|
| Figure S1. $^1\text{H}$ NMR spectrum of <i>N</i> -acryloylpyrrolidine .....                            | 10 |
| Figure S2. $^{13}\text{C}\{^1\text{H}\}$ NMR spectrum of <i>N</i> -acryloylpyrrolidine .....           | 11 |
| Figure S3. Multiplicity-edited HSQC NMR spectrum <i>N</i> -acryloylpyrrolidine.....                    | 12 |
| Figure S4. $^1\text{H}$ NMR spectrum of <i>N</i> -(2,2-difluoroethyl)acrylamide .....                  | 13 |
| Figure S5. $^{13}\text{C}\{^1\text{H}\}$ NMR spectrum of <i>N</i> -(2,2-difluoroethyl)acrylamide ..... | 14 |
| Figure S6. $^{19}\text{F}$ NMR spectrum of <i>N</i> -(2,2-difluoroethyl)acrylamide.....                | 15 |
| Figure S7. Multiplicity-edited HSQC NMR spectrum of <i>N</i> -(2,2-difluoroethyl)acrylamide .....      | 16 |
| Figure S8. $^1\text{H}$ NMR spectrum of <b>pDFEA</b> .....                                             | 17 |
| Figure S9. $^{13}\text{C}\{^1\text{H}\}$ NMR spectrum of <b>pDFEA</b> .....                            | 18 |
| Figure S10. $^{19}\text{F}$ NMR spectrum of <b>pDFEA</b> .....                                         | 19 |
| Figure S11. Multiplicity-edited HSQC NMR spectrum of <b>pDFEA</b> .....                                | 20 |
| Figure S12. $^1\text{H}$ NMR spectrum of <b>pNIPAM</b> .....                                           | 21 |
| Figure S13. $^{13}\text{C}\{^1\text{H}\}$ NMR spectrum of <b>pNIPAM</b> .....                          | 22 |
| Figure S14. Multiplicity-edited HSQC NMR spectrum of <b>pNIPAM</b> .....                               | 23 |
| Figure S15. $^1\text{H}$ NMR spectrum of <b>pDEA</b> .....                                             | 24 |
| Figure S16. $^{13}\text{C}\{^1\text{H}\}$ NMR spectrum of <b>pDEA</b> .....                            | 25 |
| Figure S17. Multiplicity-edited HSQC NMR spectrum of <b>pDEA</b> .....                                 | 26 |
| Figure S18. $^1\text{H}$ NMR spectrum of <b>pAP</b> .....                                              | 27 |
| Figure S19. $^{13}\text{C}\{^1\text{H}\}$ NMR spectrum of <b>pAP</b> .....                             | 28 |
| Figure S20. Multiplicity-edited HSQC NMR spectrum of <b>pAP</b> .....                                  | 29 |

**Size exclusion chromatographs**

|                                                                 |    |
|-----------------------------------------------------------------|----|
| Figure S21. Size exclusion chromatograms of <b>pDFEA</b> .....  | 30 |
| Figure S22. Size exclusion chromatograms of <b>pNIPAM</b> ..... | 30 |
| Figure S23. Size exclusion chromatograms of <b>pDEA</b> .....   | 31 |
| Figure S24. Size exclusion chromatograms of <b>pAP</b> .....    | 31 |

**Turbidimetry measurements**

|                                                                |    |
|----------------------------------------------------------------|----|
| Figure S25. Transmittance of <b>F1</b> ( <b>pDFEA</b> ).....   | 34 |
| Figure S26. Transmittance of <b>F2</b> ( <b>pDFEA</b> ).....   | 34 |
| Figure S27. Transmittance of <b>F3</b> ( <b>pDFEA</b> ).....   | 35 |
| Figure S28. Transmittance of <b>I1</b> ( <b>pNIPAM</b> ) ..... | 35 |
| Figure S29. Transmittance of <b>I2</b> ( <b>pNIPAM</b> ) ..... | 36 |
| Figure S30. Transmittance of <b>I3</b> ( <b>pNIPAM</b> ) ..... | 36 |

|                                                            |    |
|------------------------------------------------------------|----|
| <b>Figure S31.</b> Transmittance of <b>E1 (pDEA)</b> ..... | 37 |
| <b>Figure S32.</b> Transmittance of <b>E2 (pDEA)</b> ..... | 37 |
| <b>Figure S33.</b> Transmittance of <b>E3 (pDEA)</b> ..... | 38 |
| <b>Figure S34.</b> Transmittance of <b>P1 (pAP)</b> .....  | 38 |
| <b>Figure S35.</b> Transmittance of <b>P2 (pAP)</b> .....  | 39 |
| <b>Figure S36.</b> Transmittance of <b>P3 (pAP)</b> .....  | 39 |

#### Isothermal calorimetry measurements

|                                                            |    |
|------------------------------------------------------------|----|
| <b>Figure S37.</b> ITC curves of <b>F3 (pDFEA)</b> .....   | 41 |
| <b>Figure S38.</b> ITC curves of <b>I3 (pNIPAM)</b> .....  | 43 |
| <b>Figure S39.</b> ITC curves of <b>E3 (pDEA)</b> .....    | 44 |
| <b>Figure S40.</b> ITC curves of <b>P3 (pAP)</b> .....     | 46 |
| <b>Figure S41.</b> ITC curves of <b>benzoic acid</b> ..... | 50 |
| <b>Figure S42.</b> ITC curves of <b>F2 (pDFEA)</b> .....   | 52 |
| <b>Figure S43.</b> ITC curves of <b>F1 (pDFEA)</b> .....   | 54 |

#### Enthalpies of the titration

|                                                                                              |    |
|----------------------------------------------------------------------------------------------|----|
| <b>Figure S44.</b> Enthalpies of the titration of 10 mg/mL <b>F1, F2</b> and <b>F3</b> ..... | 55 |
|----------------------------------------------------------------------------------------------|----|

#### Dynamic light scattering measurements

|                                                                                                                    |    |
|--------------------------------------------------------------------------------------------------------------------|----|
| <b>Figure S45.</b> Size distributions of molecular assemblies as a function of temperature <b>F1 (pDFEA)</b> ..    | 58 |
| <b>Figure S46.</b> Size distributions of molecular assemblies as a function of temperature <b>F2 (pDFEA)</b> ..    | 59 |
| <b>Figure S47.</b> Size distributions of molecular assemblies as a function of temperature <b>F3 (pDFEA)</b> ..    | 60 |
| <b>Figure S48.</b> Size distributions of molecular assemblies as a function of temperature <b>I1 (pNIPAM)</b> . 61 |    |
| <b>Figure S49.</b> Size distributions of molecular assemblies as a function of temperature <b>I2 (pNIPAM)</b> . 62 |    |
| <b>Figure S50.</b> Size distributions of molecular assemblies as a function of temperature <b>I3 (pNIPAM)</b> . 63 |    |
| <b>Figure S51.</b> Size distributions of molecular assemblies as a function of temperature <b>E1 (pDEA)</b> .....  | 64 |
| <b>Figure S52.</b> Size distributions of molecular assemblies as a function of temperature <b>E2 (pDEA)</b> .....  | 65 |
| <b>Figure S53.</b> Size distributions of molecular assemblies as a function of temperature <b>E3 (pDEA)</b> .....  | 66 |
| <b>Figure S54.</b> Size distributions of molecular assemblies as a function of temperature <b>P1 (pAP)</b> .....   | 67 |
| <b>Figure S55.</b> Size distributions of molecular assemblies as a function of temperature <b>P2 (pAP)</b> .....   | 68 |
| <b>Figure S56.</b> Size distributions of molecular assemblies as a function of temperature <b>P3 (pAP)</b> .....   | 69 |

#### Refractive index increment measurements

|                                                                                                                 |    |
|-----------------------------------------------------------------------------------------------------------------|----|
| <b>Figure S57.</b> Refractive index increment ( $dn/dc$ ) measurement report of <b>F1 (pDFEA)</b> in PBS .....  | 70 |
| <b>Figure S58.</b> Refractive index increment ( $dn/dc$ ) measurement report of <b>F2 (pDFEA)</b> in PBS .....  | 71 |
| <b>Figure S59.</b> Refractive index increment ( $dn/dc$ ) measurement report of <b>F3 (pDFEA)</b> in PBS .....  | 72 |
| <b>Figure S60.</b> Refractive index increment ( $dn/dc$ ) measurement report of <b>I1 (pNIPAM)</b> in PBS ..... | 73 |
| <b>Figure S61.</b> Refractive index increment ( $dn/dc$ ) measurement report of <b>I2 (pNIPAM)</b> in PBS ..... | 74 |
| <b>Figure S62.</b> Refractive index increment ( $dn/dc$ ) measurement report of <b>I3 (pNIPAM)</b> in PBS ..... | 75 |
| <b>Figure S63.</b> Refractive index increment ( $dn/dc$ ) measurement report of <b>E1 (pDEA)</b> in PBS .....   | 76 |
| <b>Figure S64.</b> Refractive index increment ( $dn/dc$ ) measurement report of <b>E2 (pDEA)</b> in PBS .....   | 77 |
| <b>Figure S65.</b> Refractive index increment ( $dn/dc$ ) measurement report of <b>E3 (pDEA)</b> in PBS .....   | 78 |
| <b>Figure S66.</b> Refractive index increment ( $dn/dc$ ) measurement report of <b>P1 (pAP)</b> in PBS.....     | 79 |
| <b>Figure S67.</b> Refractive index increment ( $dn/dc$ ) measurement report of <b>P2 (pAP)</b> in PBS.....     | 80 |
| <b>Figure S68.</b> Refractive index increment ( $dn/dc$ ) measurement report of <b>P3 (pAP)</b> in PBS.....     | 81 |

#### Other figures

|                                                                                                                                       |    |
|---------------------------------------------------------------------------------------------------------------------------------------|----|
| <b>Figure S69.</b> $^1\text{H}$ NMR spectrum of <b>F1</b> - detection of terminal $-\text{CH}_2\text{CH}_2\text{COOCH}_3$ moiety..... | 84 |
|---------------------------------------------------------------------------------------------------------------------------------------|----|



## S1. Materials

*N,N*-dimethylformamide (DMF) and tetrahydrofuran (THF) were purchased from Lach-Ner s.r.o. (Neratovice, Czech Republic) in analytical quality, dried using molecular sieves 3.0 Å and distilled before their use. MeOH-4d (99.80% D) was purchased from Eurisotope (Saint-Aubin, France). 2,2-Difluoroethylamine (97%) was purchased from Fluorochem (Derbyshire, UK). Argon 5.0 ( $c_{Ar} \geq 99.999\%$ ) was purchased from Messer Technogas s.r.o. (Prague, Czech Republic). Foetal bovine serum (FBS, qualified, heat inactivated, 10500-064, LOT 2165873H) was purchased from Thermo Fisher Scientific (Waltham, MA, USA). Triethylamine (TEA,  $\geq 99\%$ ), acryloyl chloride (99%,  $\approx 400$  ppm phenothiazine), pyrrolidine ( $\geq 99.0\%$ ), *N,N*-diethylacrylamide (99%,  $< 200$  ppm MeHQ), and *N*-isopropylacrylamide ( $\geq 99.0\%$ ) were purchased from Sigma-Aldrich s.r.o. (Prague, Czech Republic). Foetal bovine serum was stored at  $-22$  °C; monomers, their precursors and NMR solvents were stored at  $4$  °C; the remaining chemicals were stored a dry, dark storage at room temperature. All chemicals were used without any additional purification, unless stated otherwise.

## S2. Experimental

### S2.1. Monomer synthesis

(*N*-acryloyl)pyrrolidine and *N*-(2,2-difluoroethyl)acrylamide were synthesised from acryloyl chloride and the corresponding amines (Scheme S1) as previously published in the literature,<sup>S1,S2</sup> with slight modification. The remaining monomers were purchased.

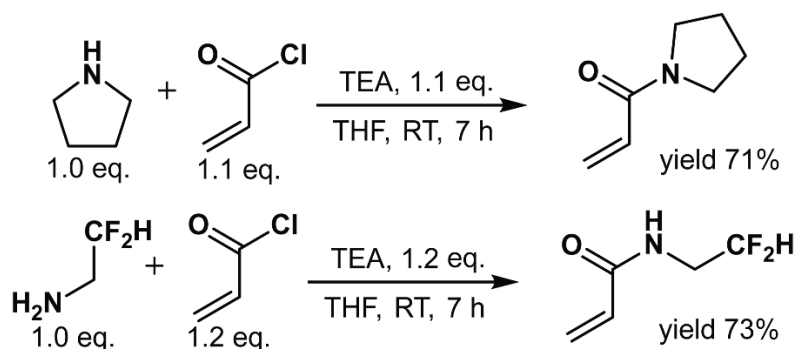

**Scheme S1.** Synthesis of (*N*-acryloyl)pyrrolidine and *N*-(2,2-difluoroethyl)acrylamide from acryloyl chloride and the corresponding amines

Pyrrolidine (18.7 mL, 16.2 g, 228 mmol) or 2,2-difluoroethylamine (14.0 mL, 16.8 g, 207 mmol), respectively, were mixed with triethylamine (34.0 mL, 24.8 g, 245 mmol), dissolved in dry tetrahydrofuran (THF, 250 mL), and cooled down to  $0$  °C on a water/ice bath. Acryloyl chloride (freshly distilled at atmospheric pressure, 20.0 mL, 22.4 g, 247 mmol) was dissolved in dry THF (40 mL), and this solution was added dropwise to the amine solution under constant stirring until cooling to  $0$  °C. After this step, the reaction mixture was stirred at room temperature for 7 h and subsequently diluted with diethyl ether (500 mL) and filtered. The filtrate was washed with an aqueous  $\text{NaHCO}_3$  solution, water, and saline using a separatory funnel. The organic phases were dried with  $\text{MgSO}_4$ , the solvent was removed using a rotary evaporator, and the product was purified by flash chromatography in multiple batches (mobile phase: ethyl acetate/hexane 1:2). The yields were 20.2 g (71%) for (*N*-acryloyl)pyrrolidine and 20.4 g (73%) for *N*-(2,2-difluoroethyl)acrylamide.

***N*-acryloylpyrrolidine:**  $^1\text{H}$  (MeOH-4d): 6.62 (dd,  $J = 16.8, 10.4$  Hz, 1H), 6.27 (dd,  $J = 16.8, 2.0$  Hz, 1H), 5.74 (dd,  $J = 10.4, 2.0$  Hz, 1H), 3.62 (t,  $J = 6.8$  Hz, 1H), 3.50 (t,  $J = 6.9$  Hz, 1H), 2.07-1.85 (m, 4H).  $^{13}\text{C}$ : 165.1, 128.7, 126.6, 46.5, 45.7, 25.6, 23.8 ppm. (Figure S1 to S3)

***N*-(2,2-difluoroethyl)acrylamide:**  $^1\text{H}$  (DMSO-6d): 8.48 (t,  $J = 4.9$  Hz, 1H), 6.28 (dd,  $J = 17.1, 10.1$  Hz, 1H), 6.14 (dd,  $J = 17.1, 2.2$  Hz, 1H), 6.04 (tt,  $J = 55.8, 3.8$  Hz, 1H), 5.65 (dd,  $J = 10.1, 2.2$  Hz, 1H),

3.57 ppm (tdd,  $J = 16.1, 6.0, 3.9$  Hz, 2H).  $^{13}\text{C}$ : 165.66, 131.40, 126.67, 114.95 (t,  $J = 239.7$  Hz), 41.29 ppm (t,  $J = 25.6$  Hz).  $^{19}\text{F}$ : -121.79 ppm (dt,  $J = 55.9, 16.1$  Hz). (Figure S4 to S7)

## S2.2. Polymer synthesis

Poly[*N*-(2,2-difluoroethyl)acrylamide] (**pDFEA**), poly(*N*-isopropylacrylamide) (**pNIPAM**), poly(*N*-diethylacrylamide) (**pDEA**) and poly(*N*-acryloylpyrrolidine) (**pAP**) were prepared by reversible addition–fragmentation chain-transfer polymerisation (RAFT)<sup>S3</sup> with 4-cyano-4-[(dodecylsulfanylthiocarbonyl)sulfanyl]pentanoic acid as the RAFT polymerisation chain transfer agent (CTA)<sup>S4</sup> and 4,4'-azobis(4-cyanovaleric acid) (ACVA) as the initiator (Figure 2).<sup>S3</sup>

The polymerisation mixture consisted of a specific monomer (1.50 to 2.00 g), CTA and ACVA in various molar ratios and dried DMF (Table S1). The mixture was bubbled with argon in an oven-dried Schlenk flask, heated to 70 °C in an oil bath and stirred with a magnetic stirring bar overnight. Subsequently, the product was precipitated in diethyl ether, filtered, and the polymer was re-dissolved in methanol and purified using a Sephadex™ LH-20 column and methanol as the eluent. The polymer-containing fractions were evaporated in a rotatory evaporator under reduced pressure, and the polymer was re-dissolved in water and isolated by freeze-drying.

**Table S1.** Volumes/ mass/ molar amount of solvent ( $V_{\text{DMF}}$ ), monomers ( $m_{\text{mon}}, n_{\text{mon}}$ ), charge transfer agent ( $m_{\text{CTA}}, n_{\text{CTA}}$ ) and initiator ( $m_{\text{ini}}, n_{\text{ini}}$ ) used in polymer synthesis

| Polymer/code  | $V_{\text{DMF}}$<br>(mL) | $m_{\text{mon}}$<br>(g) | $n_{\text{mon}}$<br>(mmol) | $m_{\text{CTA}}$<br>(mg) | $n_{\text{CTA}}$<br>( $\mu\text{mol}$ ) | $m_{\text{ini}}$<br>(mg) | $n_{\text{ini}}$<br>( $\mu\text{mol}$ ) |
|---------------|--------------------------|-------------------------|----------------------------|--------------------------|-----------------------------------------|--------------------------|-----------------------------------------|
| <b>pDFEA</b>  | F1                       |                         |                            | 21.2                     | 52.5                                    | 4.41                     | 15.8                                    |
|               | F2                       | 4.00                    | 1.50                       | 11.1                     | 14.1                                    | 35.0                     | 2.94                                    |
|               | F3                       |                         |                            | 8.5                      | 21.0                                    | 1.77                     | 6.3                                     |
| <b>pNIPAM</b> | I1                       |                         |                            | 56.5                     | 140                                     | 11.8                     | 42.0                                    |
|               | I2                       | 6.00                    | 2.00                       | 17.7                     | 28.3                                    | 70.0                     | 5.89                                    |
|               | I3                       |                         |                            | 18.8                     | 46.7                                    | 3.92                     | 14.0                                    |
| <b>pDEA</b>   | E1                       |                         |                            | 28.3                     | 70.0                                    | 5.89                     | 21.0                                    |
|               | E2                       | 6.00                    | 2.00                       | 15.7                     | 14.1                                    | 35.0                     | 2.94                                    |
|               | E3                       |                         |                            | 11.3                     | 28.0                                    | 2.35                     | 8.4                                     |
| <b>pAP</b>    | P1                       |                         |                            | 42.4                     | 105                                     | 8.82                     | 31.5                                    |
|               | P2                       | 4.00                    | 1.50                       | 12.0                     | 21.2                                    | 52.5                     | 4.41                                    |
|               | P3                       |                         |                            | 14.1                     | 35.0                                    | 2.94                     | 10.5                                    |

After polymerisation, the CTA group was removed by aminolysis using propylamine ( $\text{PrNH}_2$ ), followed by nucleophilic addition of methyl acrylate to the thiol end-group in dry DMF under an argon atmosphere, as previously reported (Figure 2).<sup>S5</sup> Polymer-CTA, propylamine, and tris(2-carboxyethyl)phosphine hydrochloride (to prevent the oxidation of thiols to disulphides<sup>S6</sup>) were dissolved in DMF (5.00 mL). The reaction mixture was stirred for 120 min at room temperature under a nitrogen atmosphere. Methyl acrylate was added to the reaction mixture and stirred at room temperature for 24 h. The polymers were purified using the procedure mentioned above. Yields and reactant amounts are summarised in Table S1 and Table S2.

**pDFEA:**  $^1\text{H}$  (MeOH-4d): 8.00 (1H), 5.95 (t,  $J = 56.1$ , 1H), 3.58 (t,  $J = 14.4$  Hz, 2H), 2.18 (1H), 1.67 ppm (2H);  $^{13}\text{C}$ : 176.2, 114.2 ( $J = 239.5$  Hz), 41.8 (t,  $J = 28.1$  Hz), 35.1 ppm;  $^{19}\text{F}$ : -123.8 ppm (2F). (Figure S8 to S11)

**pNIPAM:**  $^1\text{H}$  (MeOH-4d): 7.63 (1H), 3.98 (1H), 2.11 (1H), 1.60 (2H), 1.17 ppm (6H);  $^{13}\text{C}$ : 174.8, 42.9, 41.1–41.9, 35.0, 21.4 ppm. (Figure S12 to S14)

**pDEA:**  $^1\text{H}$  (MeOH-4d): 3.52–3.36 (4H), 2.65 (1H), 1.74–1.81 (2H), 1.13 ppm (6H);  $^{13}\text{C}$ : 174.2, 40.2–41.8, 36.6, 36.1, 12.0–13.8 ppm. (Figure S15 to S17)

**pAP:**  $^1\text{H}$  (MeOH-4d): 3.1-3.8 (4H), 2.3-2.7 (1H), 1.96 (4H), 1.68 ppm (2H);  $^{13}\text{C}$ : 173.7, 45.9-46.5, 39.0, 35.0, 24.0-25.7 ppm. (Figure S18 to S20)

**Table S2.** Mass and molar amount of previously prepared polymers ( $m_{\text{pol}}$ ,  $n_{\text{pol}}$ ), propylamine ( $V_{\text{PA}}$ ,  $n_{\text{PA}}$ ), tris(2-carboxyethyl)phosphine hydrochloride ( $m_{\text{TCEP}}$ ,  $n_{\text{TCEP}}$ ), and methyl acrylate ( $V_{\text{MA}}$ ,  $n_{\text{MA}}$ )

| Polymer/code  | $m_{\text{pol}}$<br>(g) | $n_{\text{pol}}$<br>( $\mu\text{mol}$ ) | $n_{\text{PA}}$<br>(mmol) | $V_{\text{PA}}$<br>( $\mu\text{L}$ ) | $n_{\text{TCEP}}$<br>( $\mu\text{mol}$ ) | $m_{\text{TCEP}}$<br>(mg) | $n_{\text{MA}}$<br>(mmol) | $V_{\text{MA}}$<br>(mL) |
|---------------|-------------------------|-----------------------------------------|---------------------------|--------------------------------------|------------------------------------------|---------------------------|---------------------------|-------------------------|
| <b>pDFEA</b>  | F1                      |                                         | 38.2                      | 1.91                                 | 81.2                                     | 38.2                      | 11.0                      | 6.69                    |
|               | F2                      | 1.00                                    | 27.6                      | 1.38                                 | 58.7                                     | 27.6                      | 7.9                       | 4.83                    |
|               | F3                      |                                         | 20.2                      | 1.01                                 | 42.9                                     | 20.2                      | 5.8                       | 3.54                    |
| <b>pNIPAM</b> | I1                      |                                         | 49.5                      | 2.48                                 | 105.2                                    | 49.5                      | 14.1                      | 8.66                    |
|               | I2                      | 1.00                                    | 31.6                      | 1.58                                 | 67.2                                     | 31.6                      | 9.1                       | 5.53                    |
|               | I3                      |                                         | 20.6                      | 1.03                                 | 43.8                                     | 20.6                      | 5.9                       | 3.61                    |
| <b>pDEA</b>   | E1                      |                                         | 44.8                      | 2.24                                 | 95.2                                     | 44.8                      | 12.8                      | 7.84                    |
|               | E2                      | 1.00                                    | 28.8                      | 1.44                                 | 61.2                                     | 28.8                      | 8.3                       | 5.04                    |
|               | E3                      |                                         | 24.2                      | 1.21                                 | 51.4                                     | 24.2                      | 6.9                       | 4.24                    |
| <b>pAP</b>    | P1                      |                                         | 51.0                      | 2.55                                 | 108.4                                    | 51.0                      | 14.6                      | 8.93                    |
|               | P2                      | 1.00                                    | 27.8                      | 1.39                                 | 59.1                                     | 27.8                      | 8.0                       | 4.87                    |
|               | P3                      |                                         | 19.5                      | 0.98                                 | 41.4                                     | 19.5                      | 5.6                       | 3.41                    |

### S2.3. NMR spectroscopy

All NMR spectra were measured on a Bruker Avance III HD 400 MHz spectrometer (Bruker, Billerica, MA, USA) equipped with a broadband probe. All compounds (5 to 10 mg) were dissolved in MeOH-4d or DMSO-6d (0.50 to 0.80 mL). The following spectra were assessed:  $^1\text{H}$  NMR (32 scans, relaxation delay 30.0 s),  $^{13}\text{C}$  NMR ( $^1\text{H}$  decoupled, 1024 scans, relaxation delay 2.00 s),  $^{19}\text{F}$  NMR (64 scans, relaxation delay 5.00 s),  $^1\text{H}$ - $^{13}\text{C}$  multiplicity-edited HSQC (heteronuclear single quantum coherence spectroscopy)<sup>S7,S8</sup> (2 scans, relaxation delay 1.50 s, size of the fid 2048 by 256, spectral width 14.0 by 200 ppm, using  $^1\text{H}$  and  $^{13}\text{C}$  external projections), see Figure S1 to S20. These spectra were used for polymer structure confirmation and peak-matching. In addition, we used  $^1\text{H}$  NMR spectra of all polymers (256 scans, relaxation delay 5.00 s) to determine polymer purity and end-moiety conversion. The spectra were processed in TopSpin 3.6.1 (Bruker, Billerica, MA, USA) and MestReNova 6.0.2 (Mestrelab Research S.L., Santiago de Compostela, Spain), trace contaminants were assigned according to reference.<sup>S9</sup> Both processed and non-processed NMR spectra of all polymers are available from the **NMR.rar** file on the website of the journal.

All 1D spectra were processed in MestReNova 6.0.2 (Mestrelab Research S.L., Santiago de Compostela, Spain), and all 2D spectra were processed in TopSpin 3.6.1 (Bruker, Billerica, MA, USA).

### S2.4. Size exclusion chromatography

The number-average molar mass ( $M_n$ ), weight-average molar mass ( $M_w$ ), and polymer dispersity ( $D_M = M_w/M_n$ ) were determined by SEC using an HPLC Ultimate 3000 system (Dionex, Sunnyvale, CA, USA) equipped with an SEC column (TSKgel SuperAW3000 150  $\times$  6 mm, 4  $\mu\text{m}$ ). Three detectors, UV/VIS, refractive index (RI) Optilab<sup>®</sup>-rEX and multiangle light scattering (MALS) DAWN<sup>®</sup> EOS (Wyatt Technology Co., Santa Barbara, CA, USA), were employed with a methanol (A) and sodium acetate buffer (B, 0.3 M, pH 6.5) mixture (A:B = 80:20 v/v, flow rate of 0.6 mL $\cdot$ min<sup>-1</sup>) as the mobile phase (Figure S21 to S24). The  $dn/dc$  of the mobile phase and polymers was 0.1100 (pDFEA), 0.1540 (pNIPAM), 0.2015 (pDEA), and 0.1646 mL $\cdot$ g<sup>-1</sup> (pAP) at 620 nm and 20  $^\circ\text{C}$ .

## S2.5. Turbidimetry

Turbidimetry was measured on a Crystal16™ parallel crystalliser turbidimeter (Avantium Technologies, Ontario, Canada) connected to a recirculation chiller and dry compressed air. Aqueous polymer solutions were heated from 10.0 °C to 55.0 °C (in some cases to 80.0 °C) with a heating rate of 0.5 K·min<sup>-1</sup>, followed by cooling to 10 °C and maintaining this temperature for 30 min. Each measurement was repeated 6 times; the samples were stirred at 700 rpm.

All polymers were dissolved in ultrapure water, phosphate buffered saline (PBS, 140 mM, pH = 7.40, Dulbecco type<sup>S10</sup>) or foetal bovine serum (FBS) at a concentration of 1.25, 2.50, 5.00, 10.0, 20.0 and 40.0 mg/mL. The samples were stored at 4°C before their measurements. Transmittance was monitored at  $\lambda = 600$  nm. A sudden decrease of transmittance below 50% indicated the cloud point temperature.<sup>S11</sup>

## S2.6. Refractive index increment ( $dn/dc$ )

We measured the refractive index increment ( $dn/dc$ ) of all study polymers (in PBS in five different concentrations (*ca.*  $\approx 0.12$  to  $\approx 2.3$  mg/mL) on a PSS DnDc-2010/620 differential refractometer (Polymer Standard Service, Mainz, Germany) at 620 nm and 29.0 °C. The data were processed using Differential Refractometer Software (version 5.32, Brookhaven Instruments Corp., Holtsville, NY, USA), see **Figure S57 to S68**. The refractometer was calibrated using a series of aqueous solutions of potassium chloride according to the user manual.

## S2.7. Dynamic light scattering (DLS)

We determined the size of the polymer assemblies by dynamic light scattering (DLS) on a Zetasizer Nano-ZS, Model ZEN3600 (Malvern Instruments, Malvern, UK) at  $\theta = 173^\circ$  scattering angle and at 15.0 to 60.0 °C with 0.5 °C increment and 2 min of temperature equilibration per step. The measurement was repeated 3 times at each step. All samples were filtered using 0.45  $\mu$ m PVDF filters before the measurements. The data were evaluated using the Zetasizer software (Nano, version 7.10, Malvern, UK), JMalgen (v.2.0, Institute of Macromolecular Chemistry, Prague, Czech Republic), Genr (v.11, Institute of Macromolecular Chemistry, Prague, Czech Republic)<sup>S12</sup> and Matlab (v.9.9.0.1467703 (R2020b), The MathWorks, Inc., Natick, MA, USA). We present the DLS results as intensity-based size distributions because they entail smaller calculation errors than volume or number-based size distributions.

## S2.8. Isothermal titration calorimetry

**F1**, **F2**, **F3**, **I3**, **E3** or **P3** polymer solutions (10 mg/mL, 201  $\mu$ L) in ultrapure water were titrated with PBS or FBS using ITC 200 titration calorimeter (Malvern Panalytical, Malvern, UK). In each run, 40  $\mu$ L of PBS or FBS was added in consecutive injections (the first injection was always 0.1  $\mu$ L; then with increment 0.5 or 1.0  $\mu$ L). All samples were stirred at 1000 rpm and titrated at three temperatures: (i) below  $T_{CP}$ , 293 K for all polymers in all media; (ii) below  $T_{CP}$  in ultrapure water, but above  $T_{CP}$  in PBS or FBS, 298 K (**F1**), 301 K (**E3** and **F3**), 303 K (**I3**), 305 K (**F2**) and 323 K (**P3**); and (iii) above  $T_{CP}$  in all media, 313 K (**E3** and **I3**), 323 K (**F3**) and 333 K (**P3**). Subsequently, PBS and FBS were titrated to ultrapure water at all experimental temperatures to determine their heat of dilution (as blanks samples). In addition, PBS and FBS were titrated (10 $\times$ 1  $\mu$ L injections) to the solution of benzoic acid (0.25 mM  $\approx$  concentrations of polymers) at 293, 313 and 333 K to estimate the thermal contribution of the neutralization reaction of terminal carboxylic group (see **Figure S41** for details).

The isotherms of complex shape were fitted to two independent binding sites model (using Wiseman model<sup>S13</sup>). The ionic strength of PBS (162.7 mM) was accepted as the titrant concentration for both PBS and FBS. From the fit, the reaction enthalpy change  $\Delta H$  for the first binding site (kJ/mol of polymer) was extracted and normalized to the concentration of the monomer units. Other fitting

parameters (stoichiometry  $n$  and association constant  $K$ ,  $\text{M}^{-1}$ ) were not used in the discussion (see **Figures S37 to S43** for details).

### **S2.9. Data processing**

All data were processed in Microsoft Office 365 Pro Plus 16.0 (Microsoft, Redmond, WA, USA) and OriginPro 8.6.0 (OriginLab Corporation, Northampton, MA, USA) unless stated otherwise. The schemes and structures were drawn in ChemDraw Professional 16.0.1.4 (77) (Perkin Elmer Informatics, Inc., Waltham, MA, USA). The graphics were processed in Adobe Illustrator CS6 16.0.0 (Adobe Systems Inc., San Jose, CA, USA).

## S3. NMR spectra

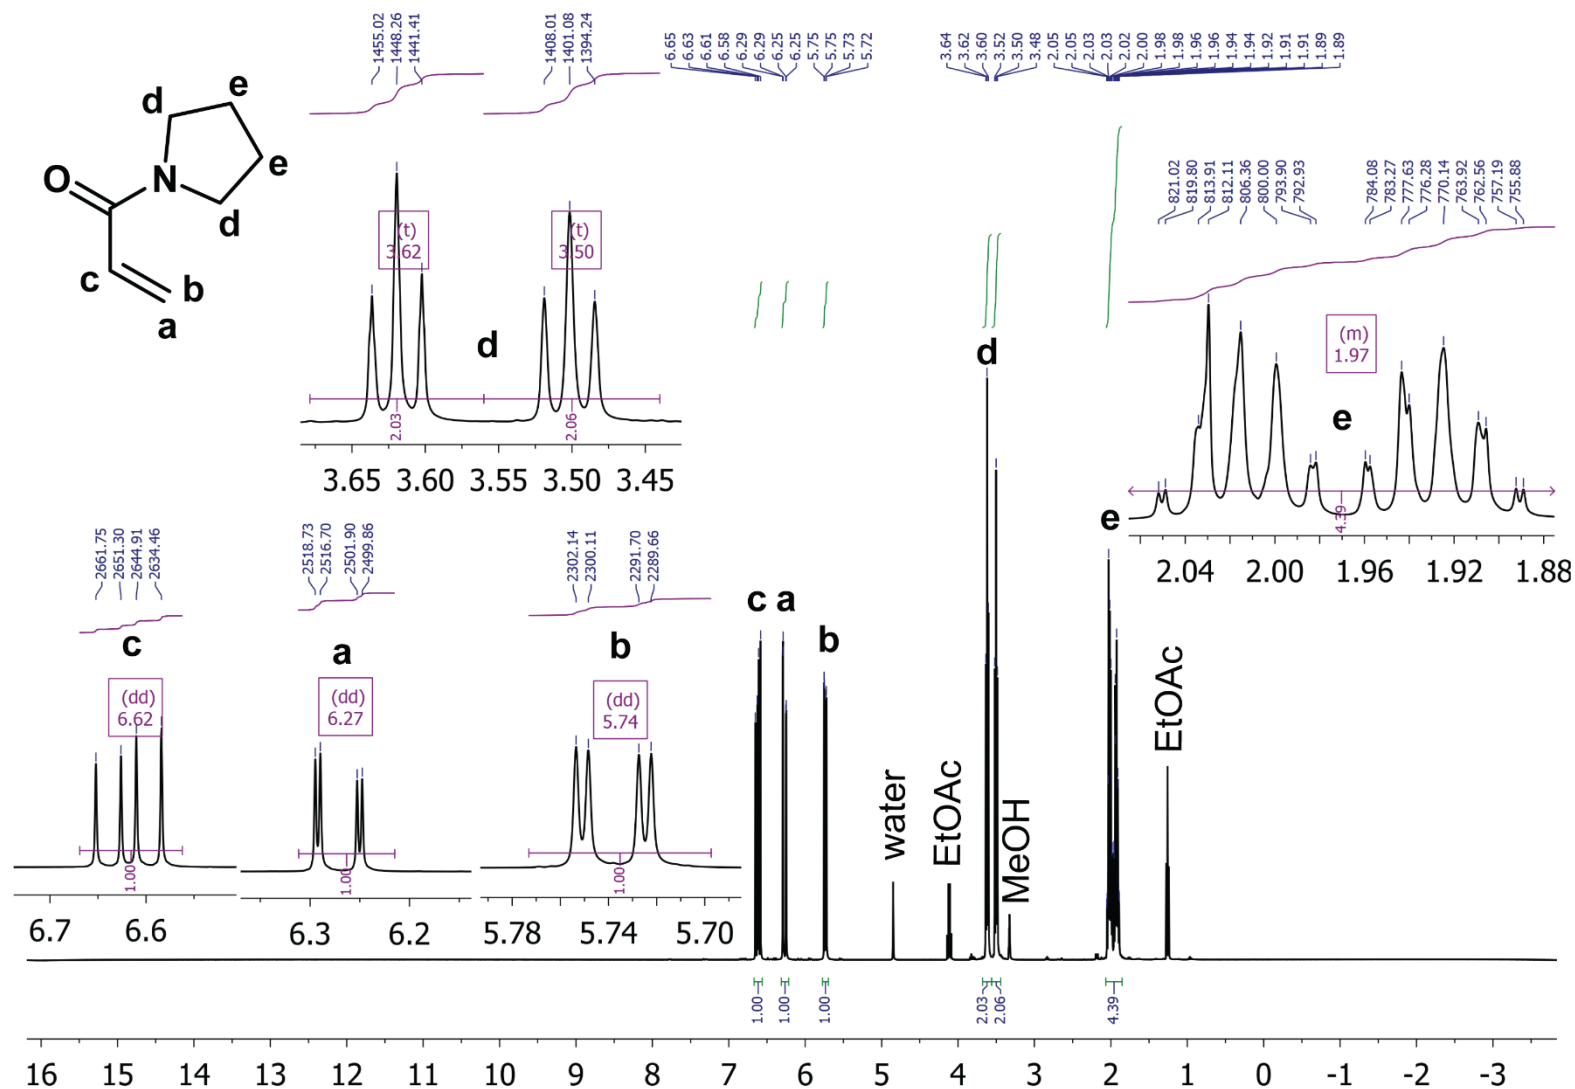

**Figure S1.**  $^1\text{H}$  NMR (400 MHz) spectrum of the *N*-acryloylpyrrolidine monomer in  $\text{MeOH-}4d$ : 6.62 (dd,  $J = 16.8, 10.4$  Hz, 1H), 6.27 (dd,  $J = 16.8, 2.0$  Hz, 1H), 5.74 (dd,  $J = 10.4, 2.0$  Hz, 1H), 3.62 (t,  $J = 6.8$  Hz, 1H), 3.50 (t,  $J = 6.9$  Hz, 1H), and 2.07-1.85 ppm (m, 4H)

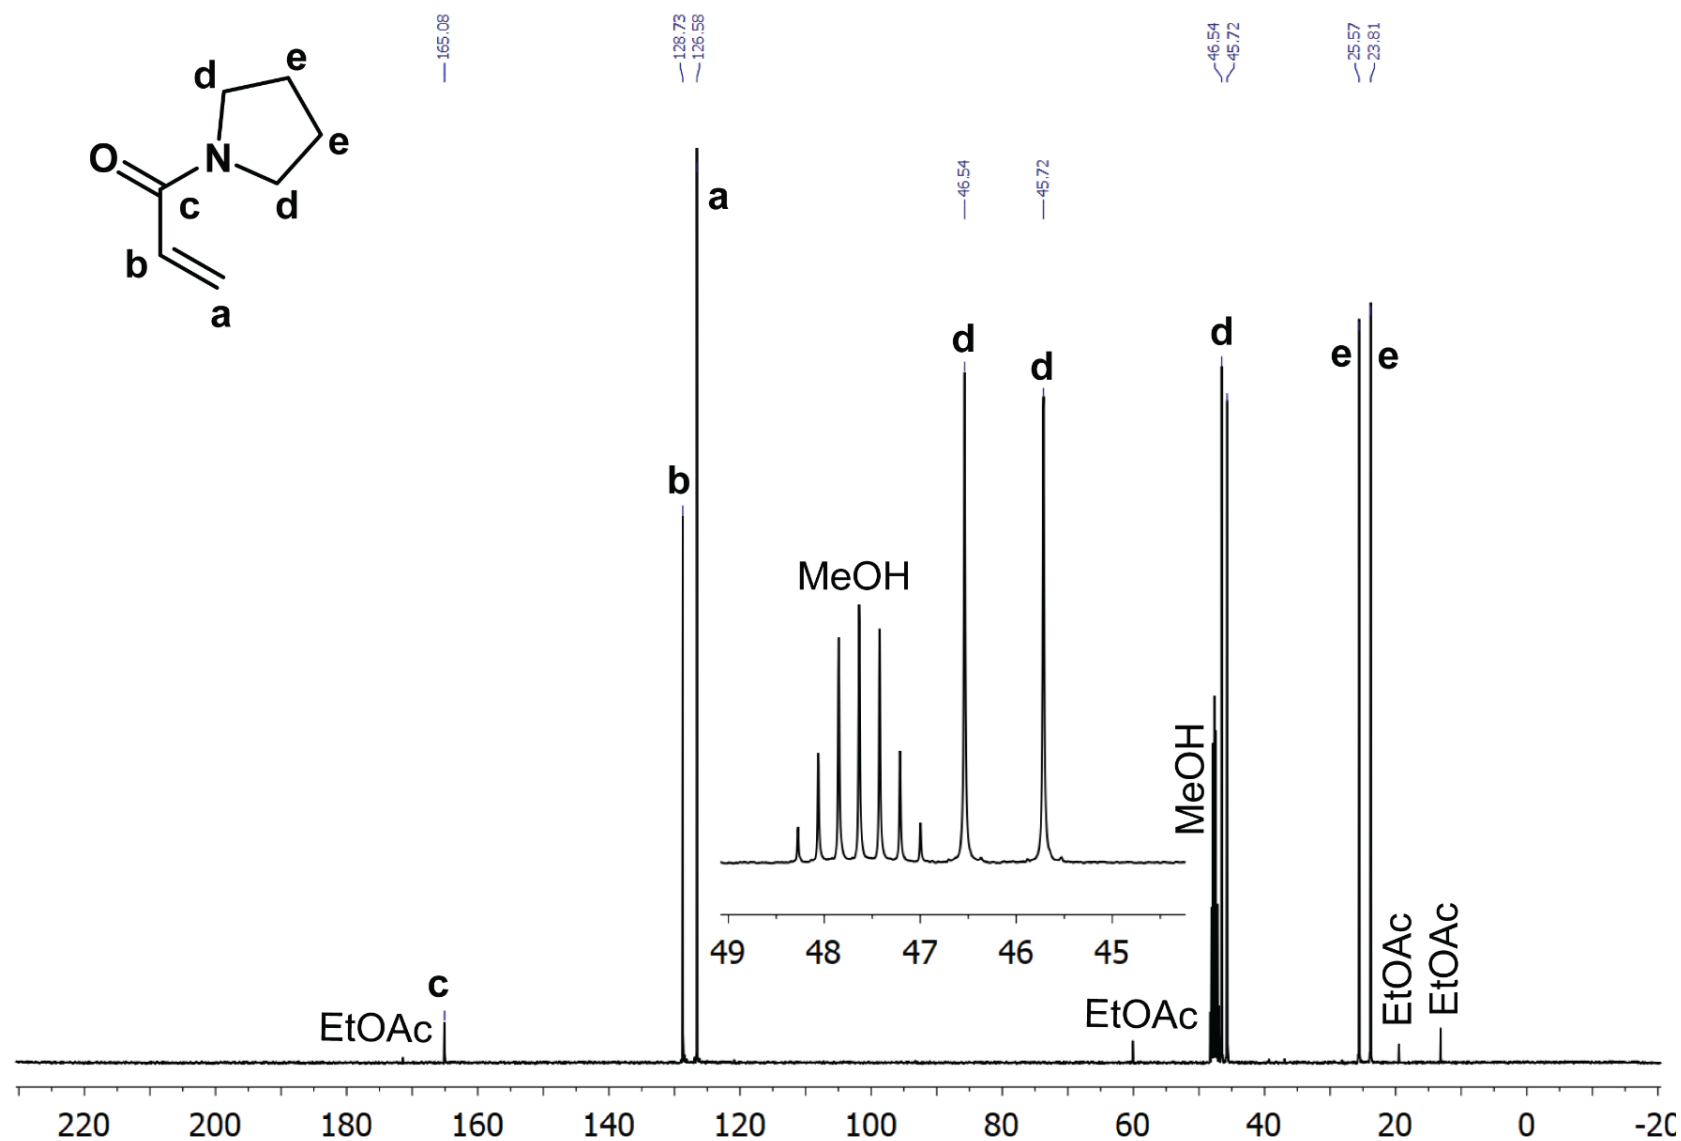

**Figure S2.**  $^{13}\text{C}\{^1\text{H}\}$  NMR (101 MHz) spectrum of the *N*-acryloylpyrrolidine monomer in  $\text{MeOH-d}_4$ : 165.1, 128.7, 126.6, 46.5, 45.7, 25.6, and 23.8 ppm

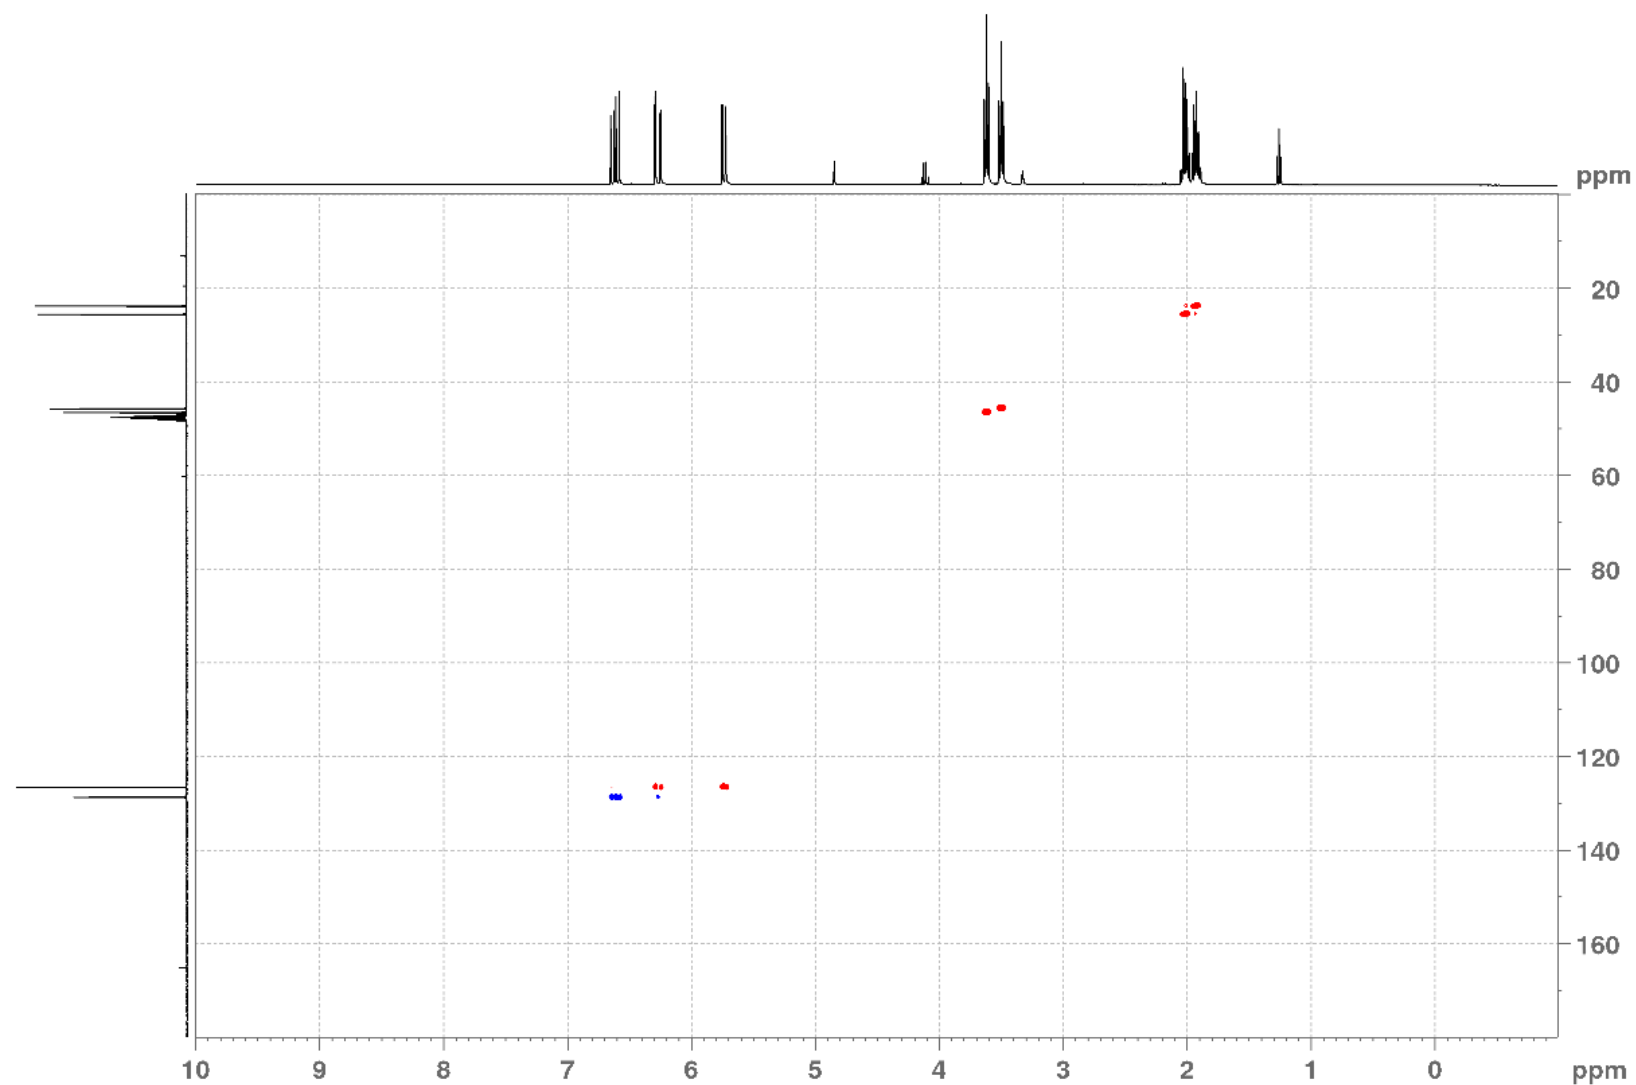

**Figure S3.** Multiplicity-edited HSQC NMR spectrum (400 MHz) of the *N*-acryloylpyrrolidine monomer in MeOH-4d; negative values (**red**) indicate CH<sub>2</sub> moieties, while positive values (**blue**) indicate CH or CH<sub>3</sub> moieties



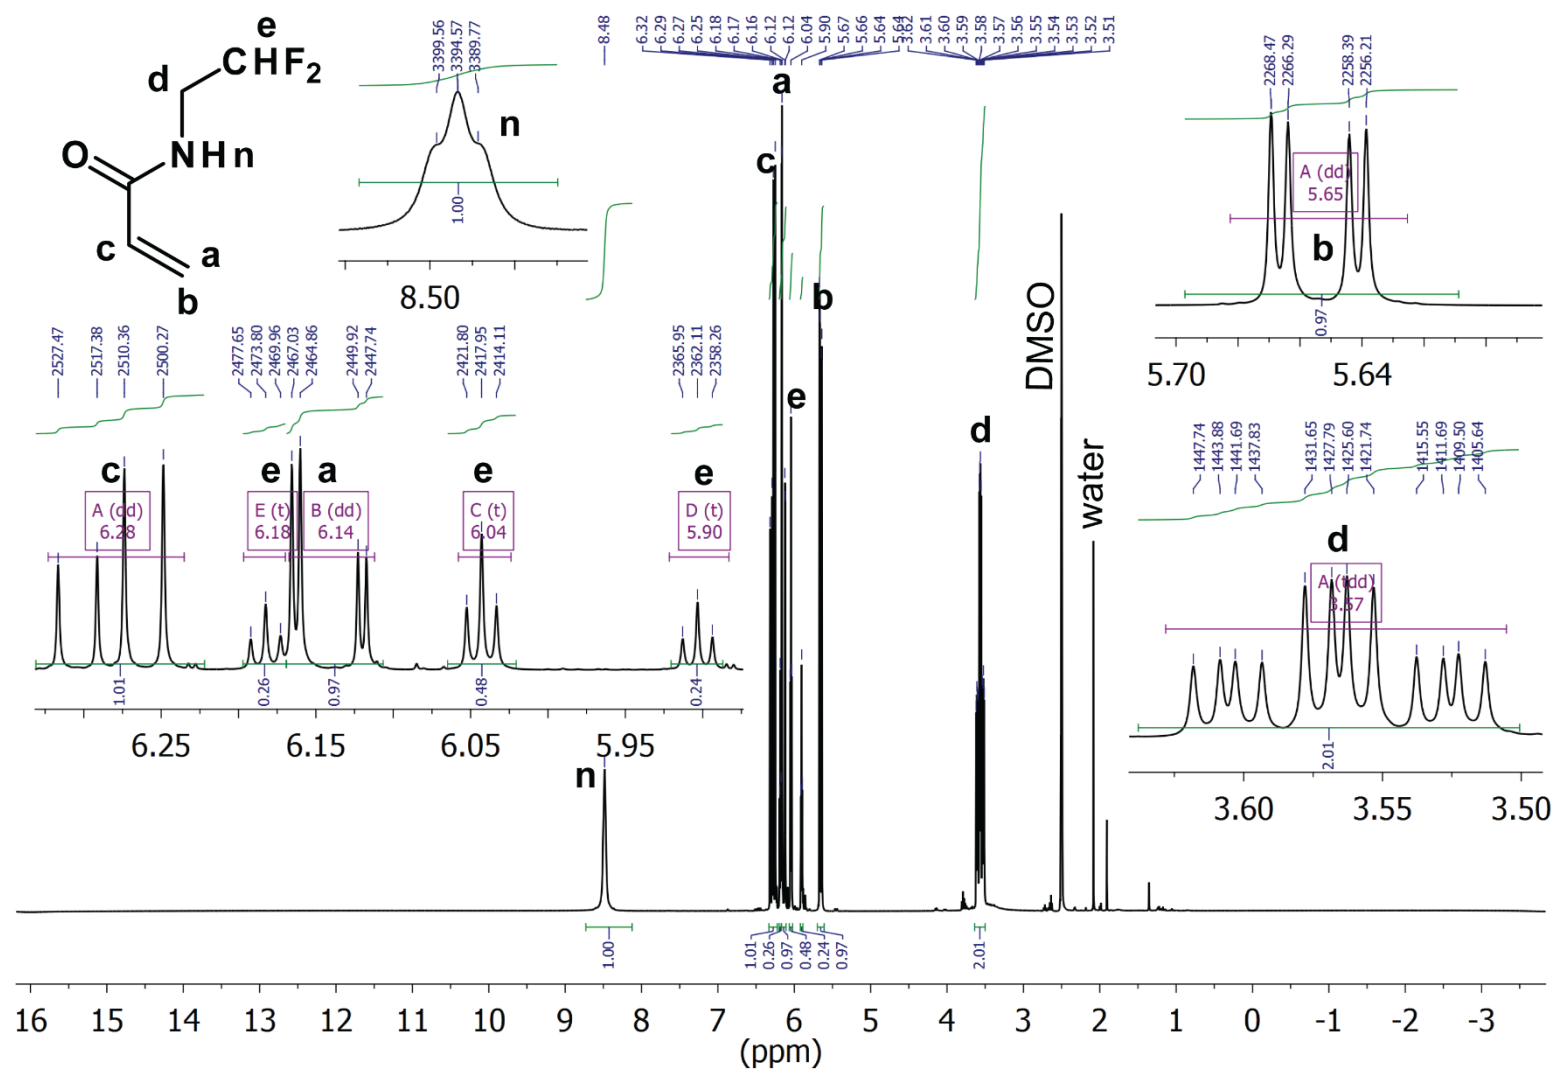

**Figure S4.**  $^1\text{H}$  NMR (400 MHz) spectrum of the *N*-(2,2-difluoroethyl)acrylamide monomer in  $\text{DMSO}-d_6$ : 8.48 (t,  $J = 4.9$  Hz, 1H), 6.28 (dd,  $J = 17.1, 10.1$  Hz, 1H), 6.14 (dd,  $J = 17.1, 2.2$  Hz, 1H), 6.04 (tt,  $J = 55.8, 3.8$  Hz, 1H), 5.65 (dd,  $J = 10.1, 2.2$  Hz, 1H), and 3.57 ppm (tdd,  $J = 16.1, 6.0, 3.9$  Hz, 2H). The signal **n** in the zoom area was apodized differently from the rest of this spectrum. As shown in the spectrum, the signal **e** is split into three areas, and the total signal integral of all three areas is  $\approx 0.97$ .

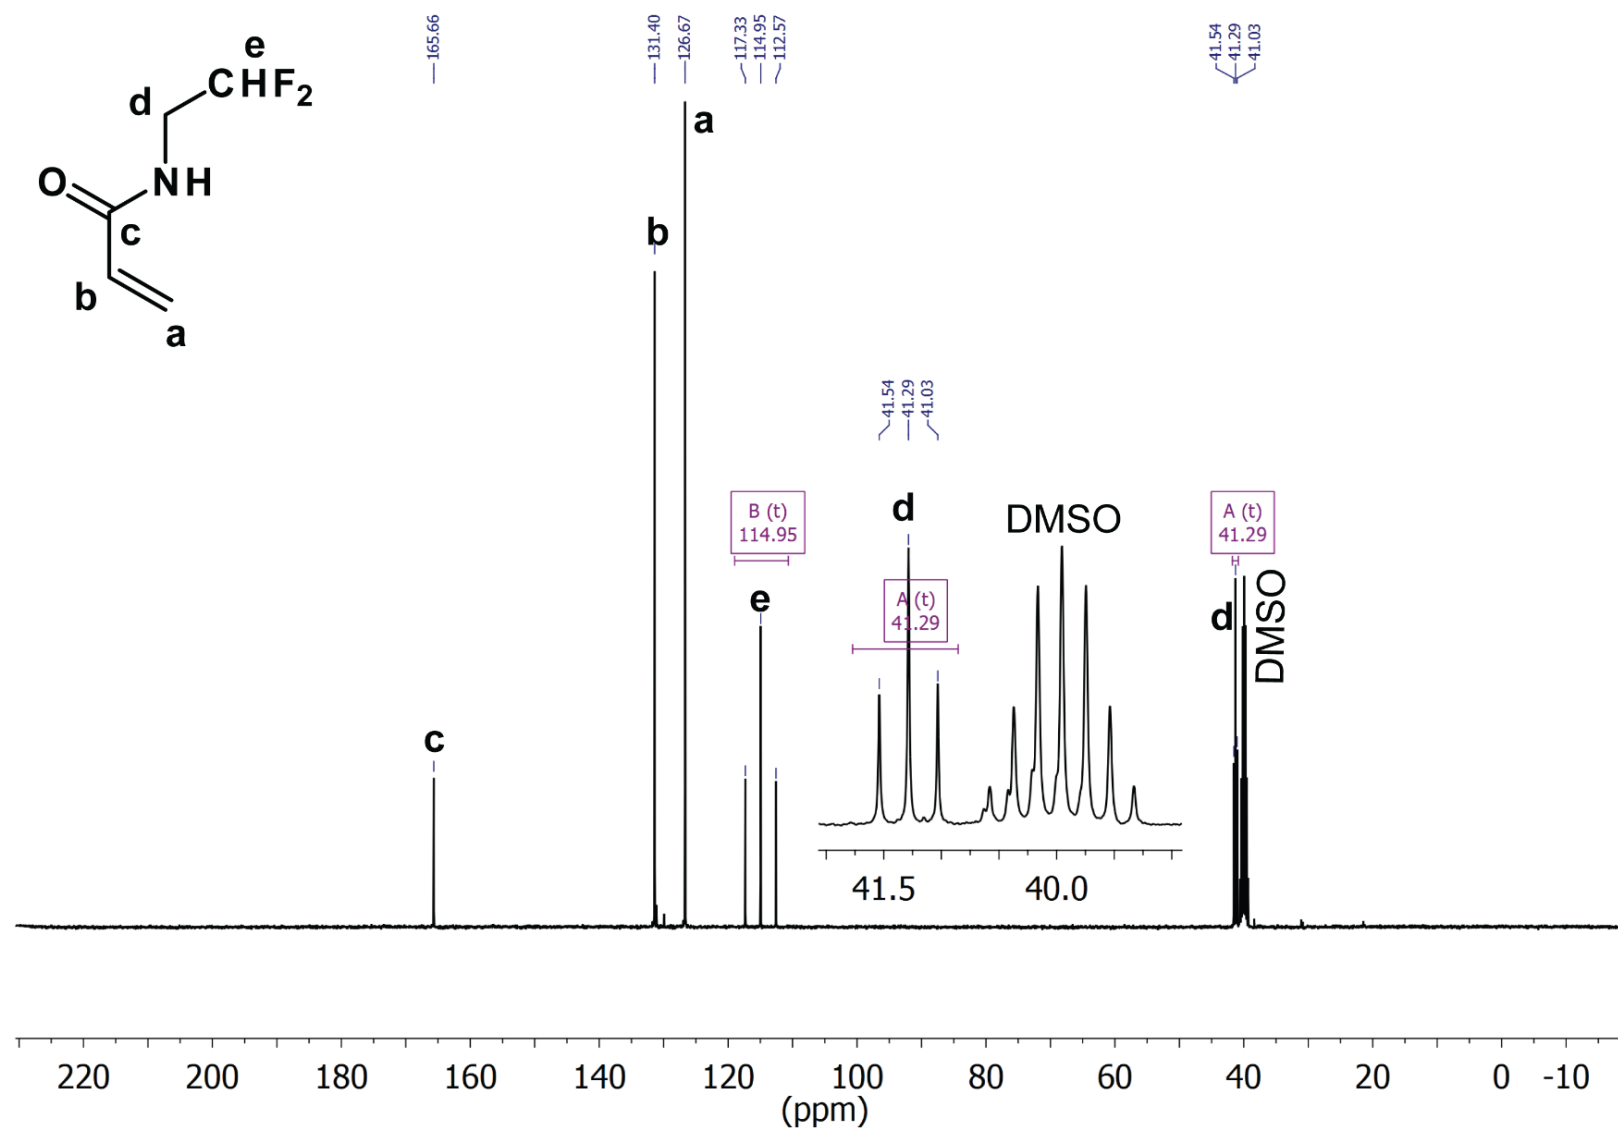

**Figure S5.** <sup>13</sup>C{<sup>1</sup>H} NMR (101 MHz) spectrum of the *N*-(2,2-difluoroethyl)acrylamide monomer in DMSO-d<sub>6</sub>: 165.66, 131.40, 126.67, 114.95 (t,  $J = 239.7$  Hz), and 41.29 ppm (t,  $J = 25.6$  Hz)

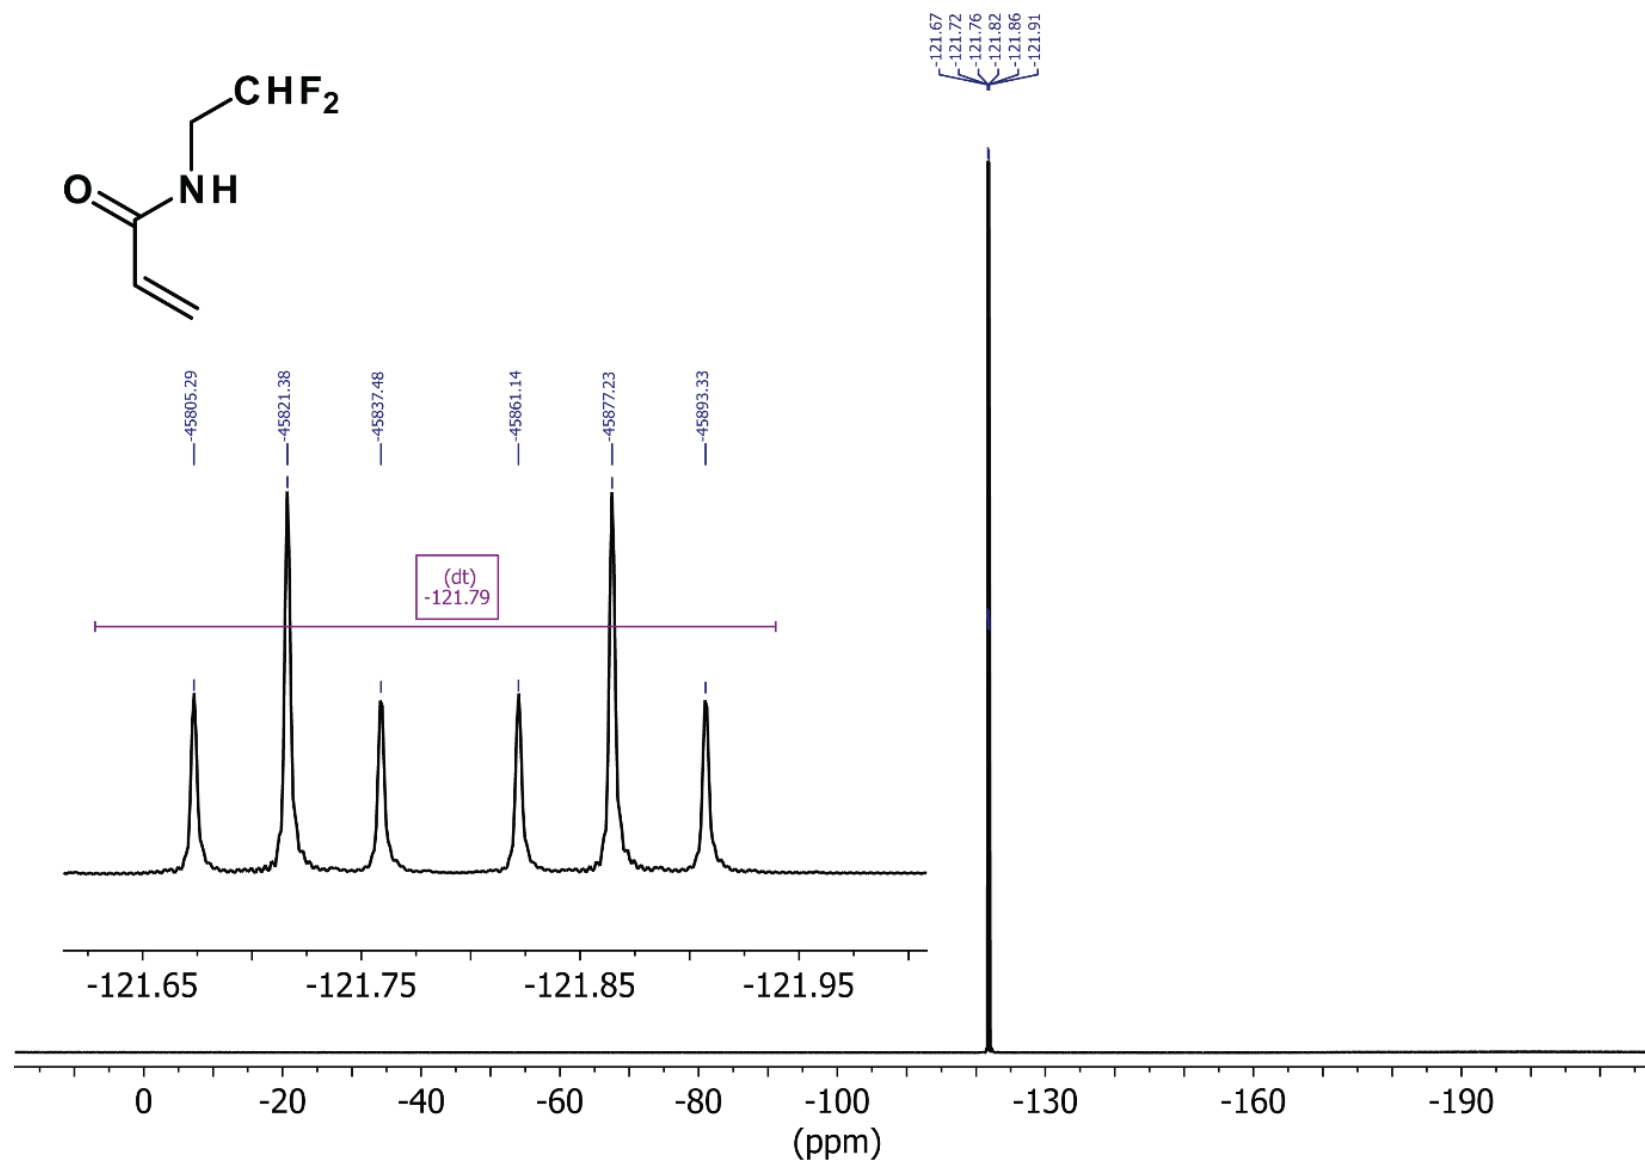

**Figure S6.** <sup>19</sup>F NMR (376 MHz) spectrum of the *N*-(2,2-difluoroethyl)acrylamide monomer in DMSO-*d*<sub>6</sub>: -121.79 ppm (dt, *J* = 55.9, 16.1 Hz; 2F)

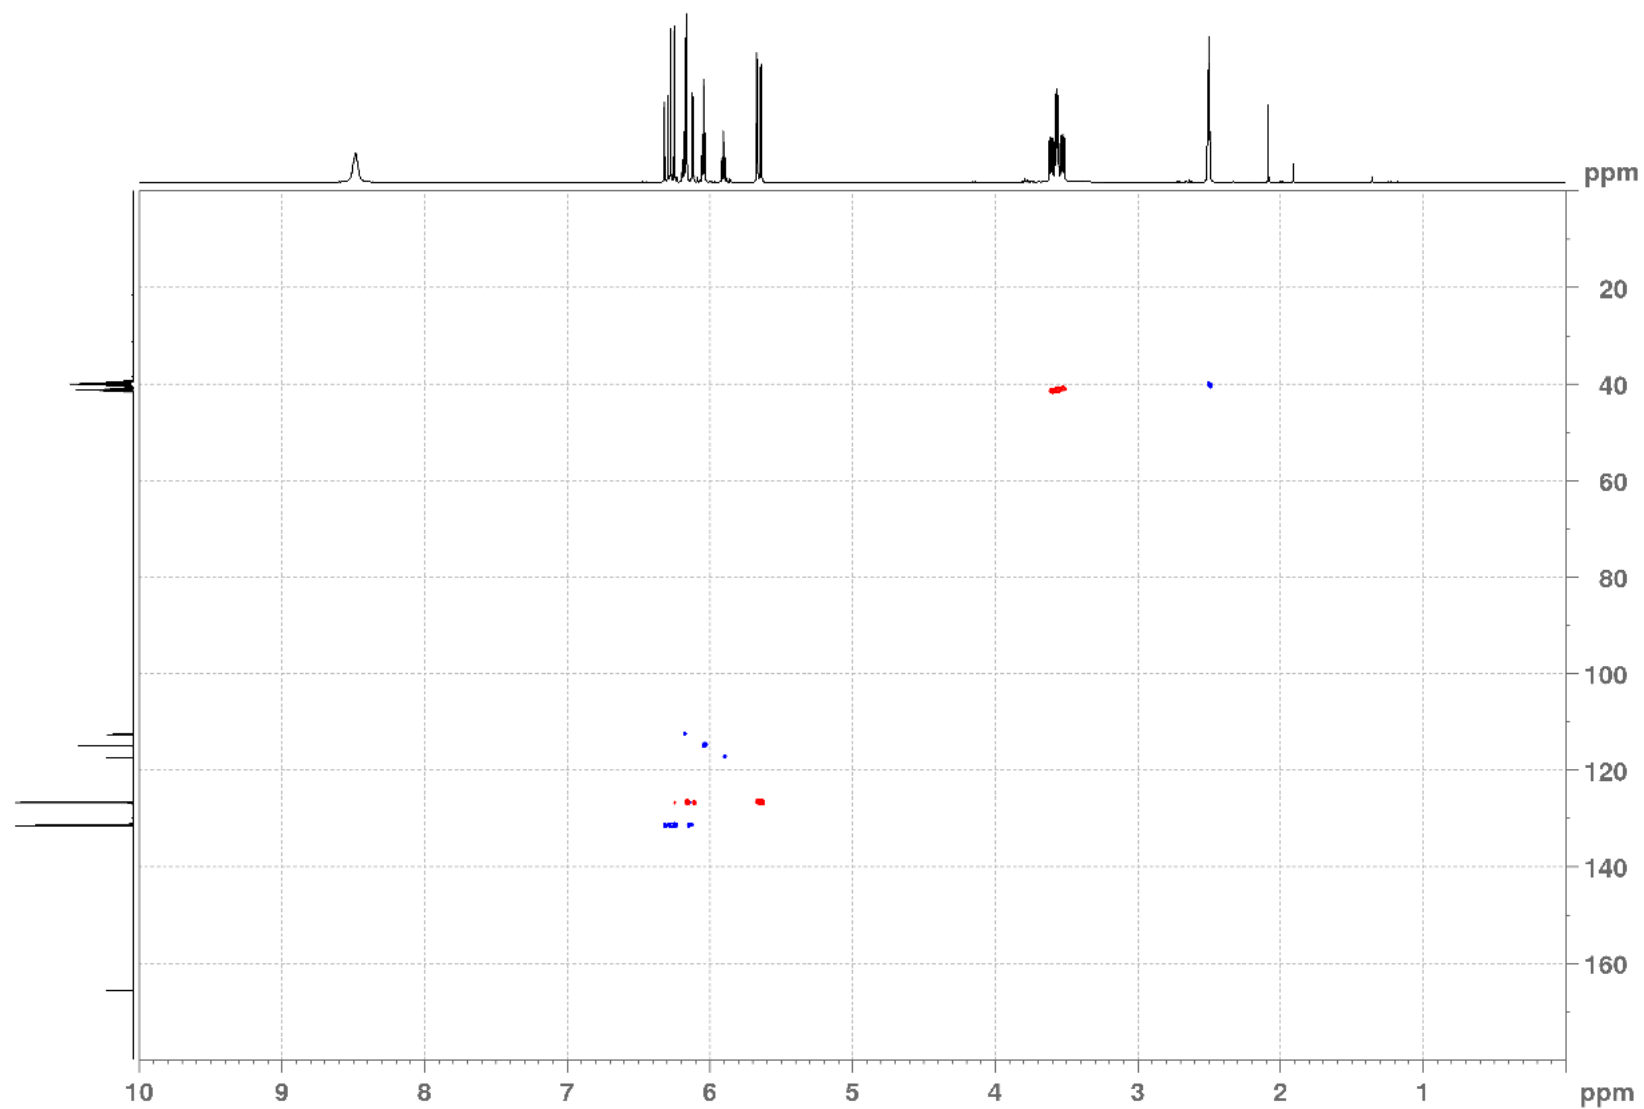

**Figure S7.** Multiplicity-edited HSQC NMR (400 MHz) spectrum of *N*-(2,2-difluoroethyl)acrylamide in DMSO- $d_6$ ; negative values (red) indicate  $\text{CH}_2$  moieties, while positive values (blue) indicate CH or  $\text{CH}_3$  moieties.

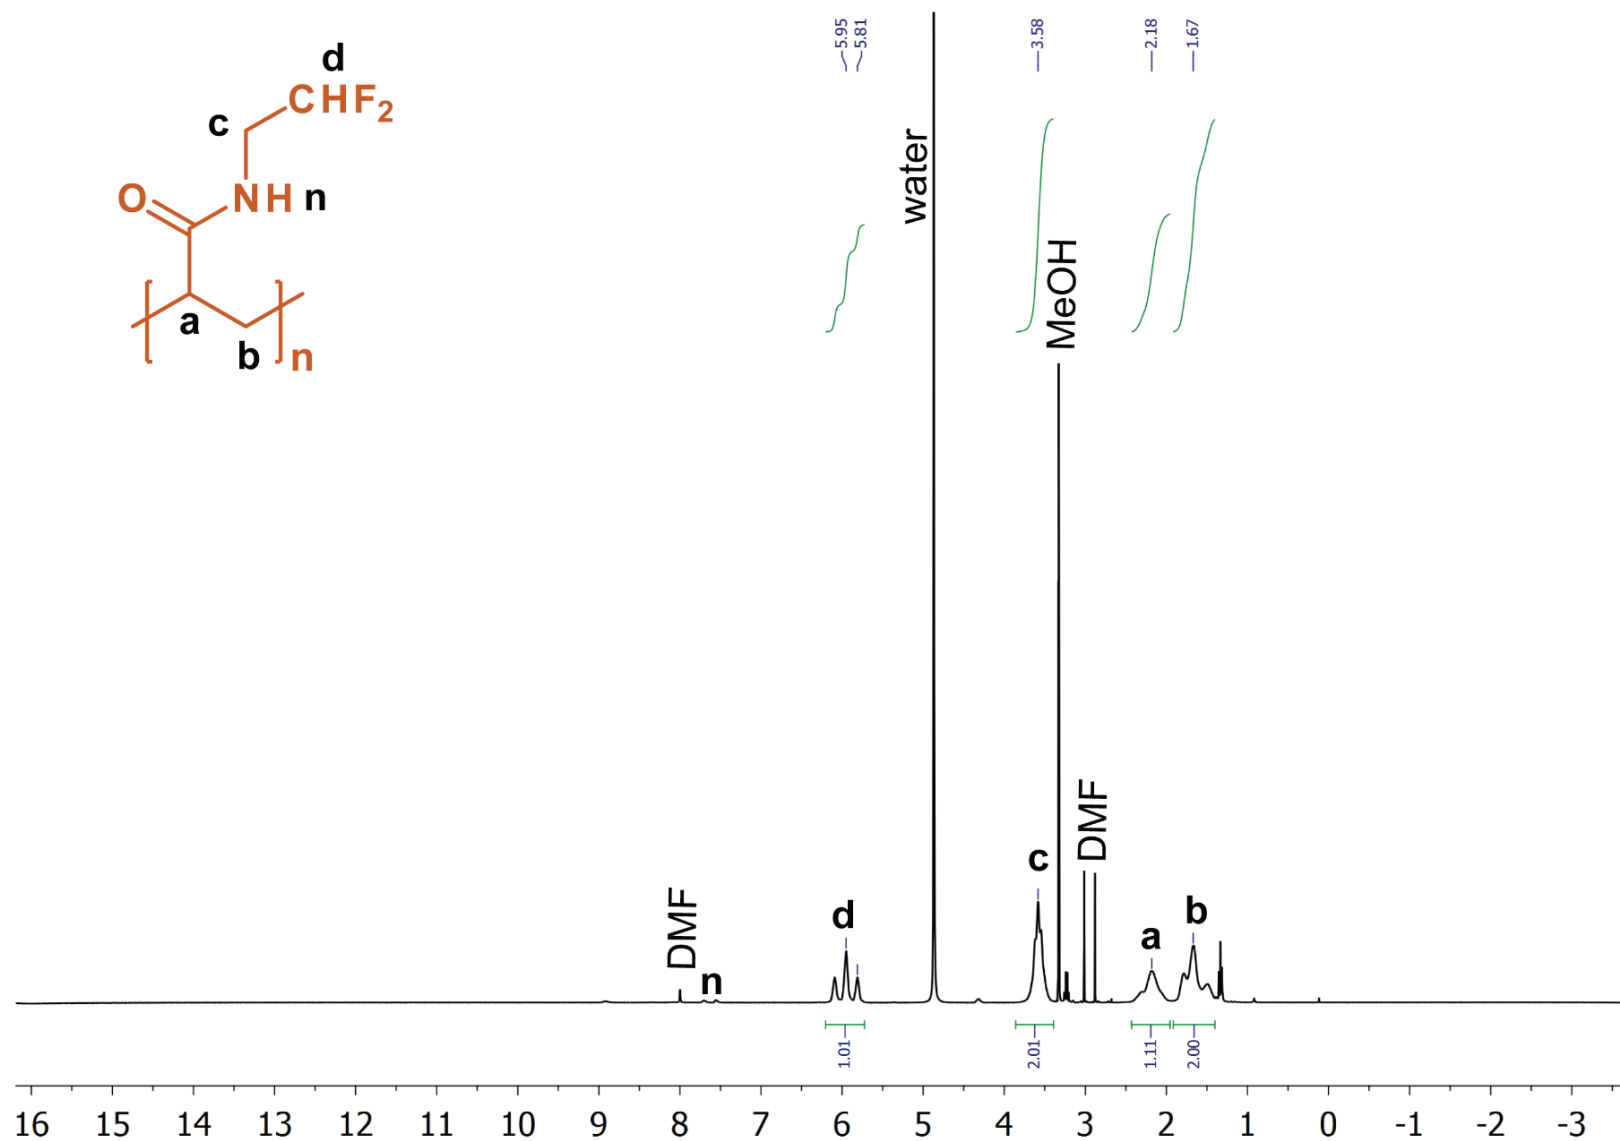

**Figure S8.**  $^1\text{H}$  NMR (400 MHz) spectrum of the pDFA polymer in MeOH-4d: 8.00 (1H), 5.95 (t,  $J = 56.1$ , 1H), 3.58 (t,  $J = 14.4$  Hz, 2H), 2.18 (1H), and 1.67 ppm (2H).

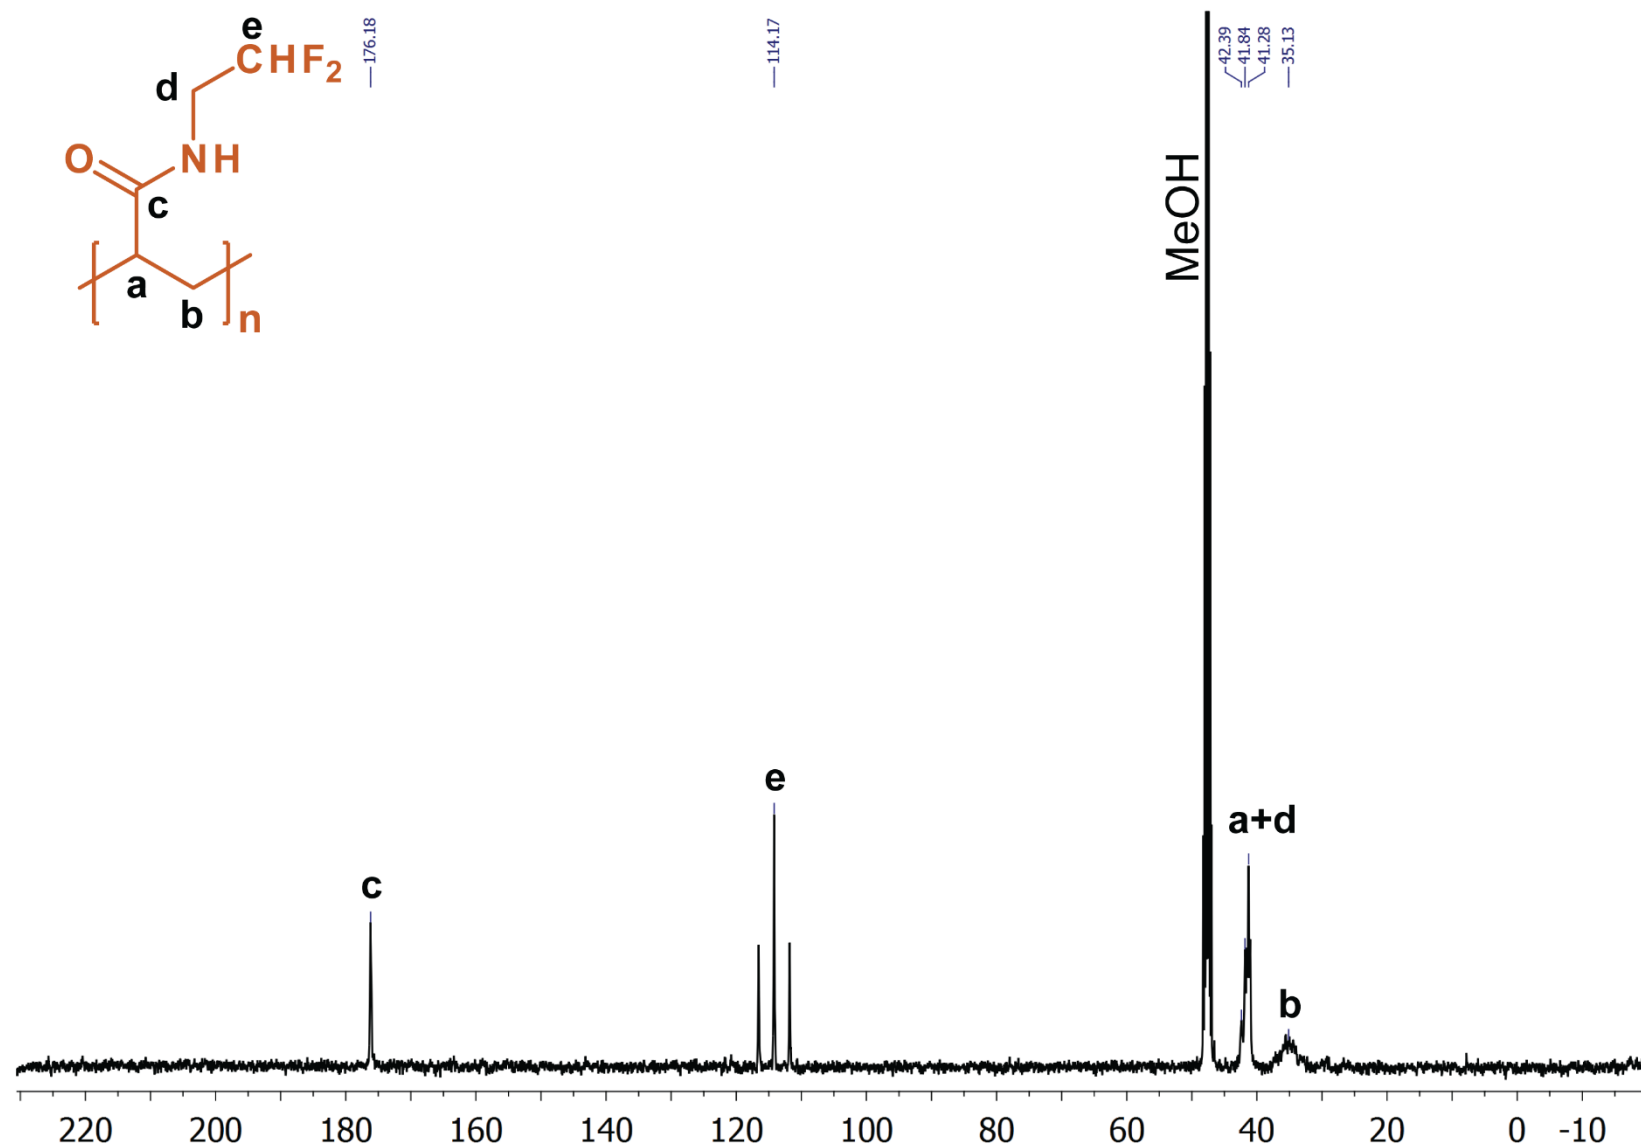

**Figure S9.**  $^{13}\text{C}\{^1\text{H}\}$  NMR (101 MHz) spectrum of the pDfEA polymer in MeOH-4d: 176.2, 114.2 ( $J = 239.5$  Hz), 41.8 (t,  $J = 28.1$  Hz), and 35.1 ppm

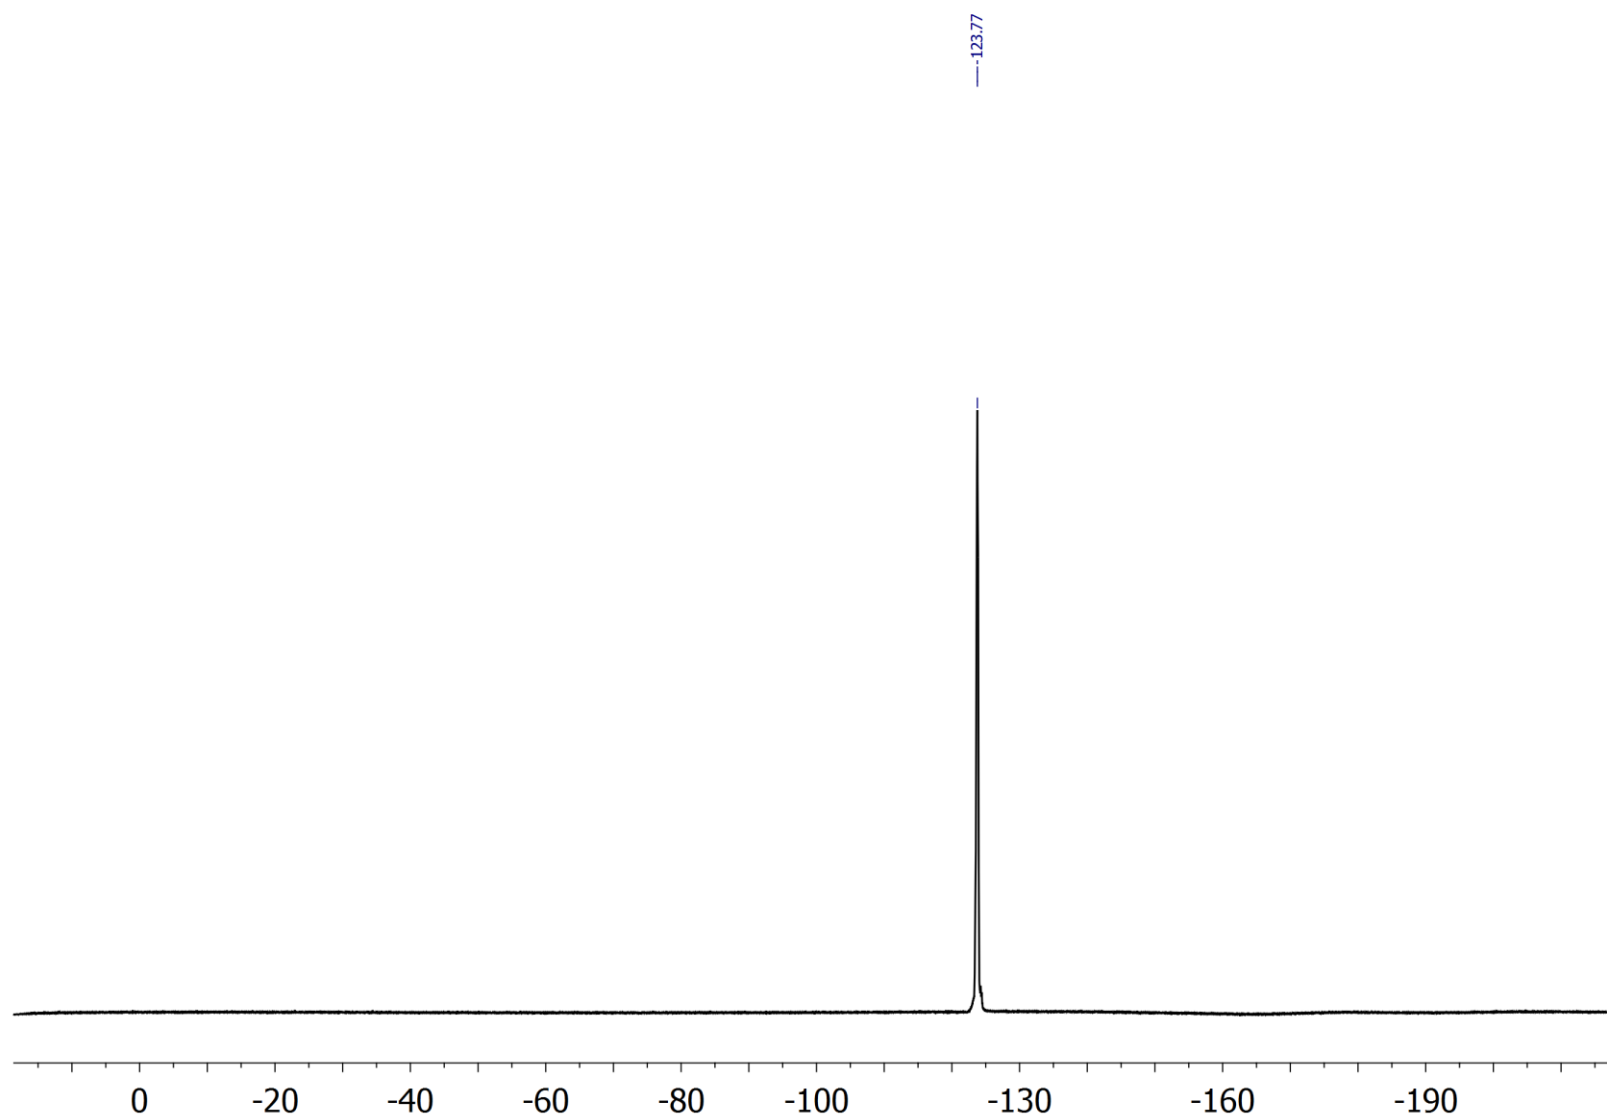

**Figure S10.**  $^{19}\text{F}$  NMR (376 MHz) spectrum of the **pDFEA** polymer in MeOH-4d: -123.8 ppm

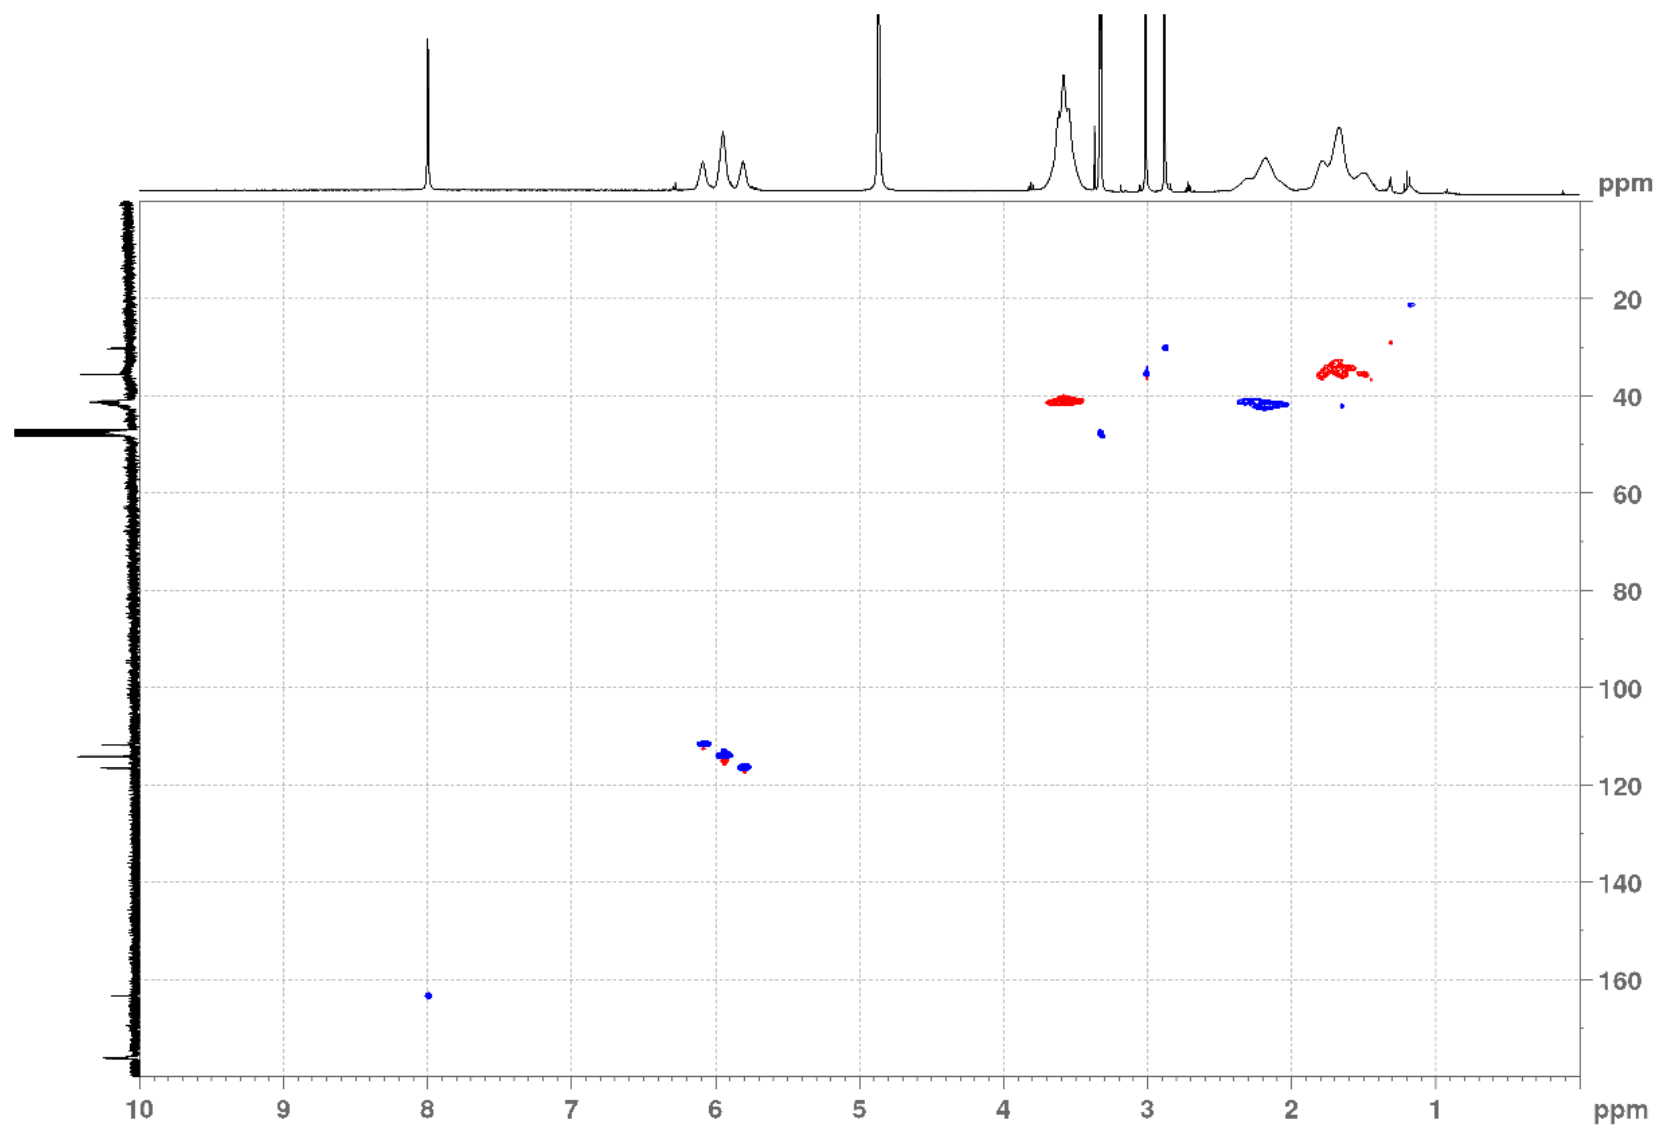

**Figure S11.** Multiplicity-edited HSQC NMR (400 MHz) spectrum of **pDfEA** polymer in MeOH-4d; negative values (**red**) indicate CH<sub>2</sub> moieties, while positive values (**blue**) indicate CH or CH<sub>3</sub> moieties.



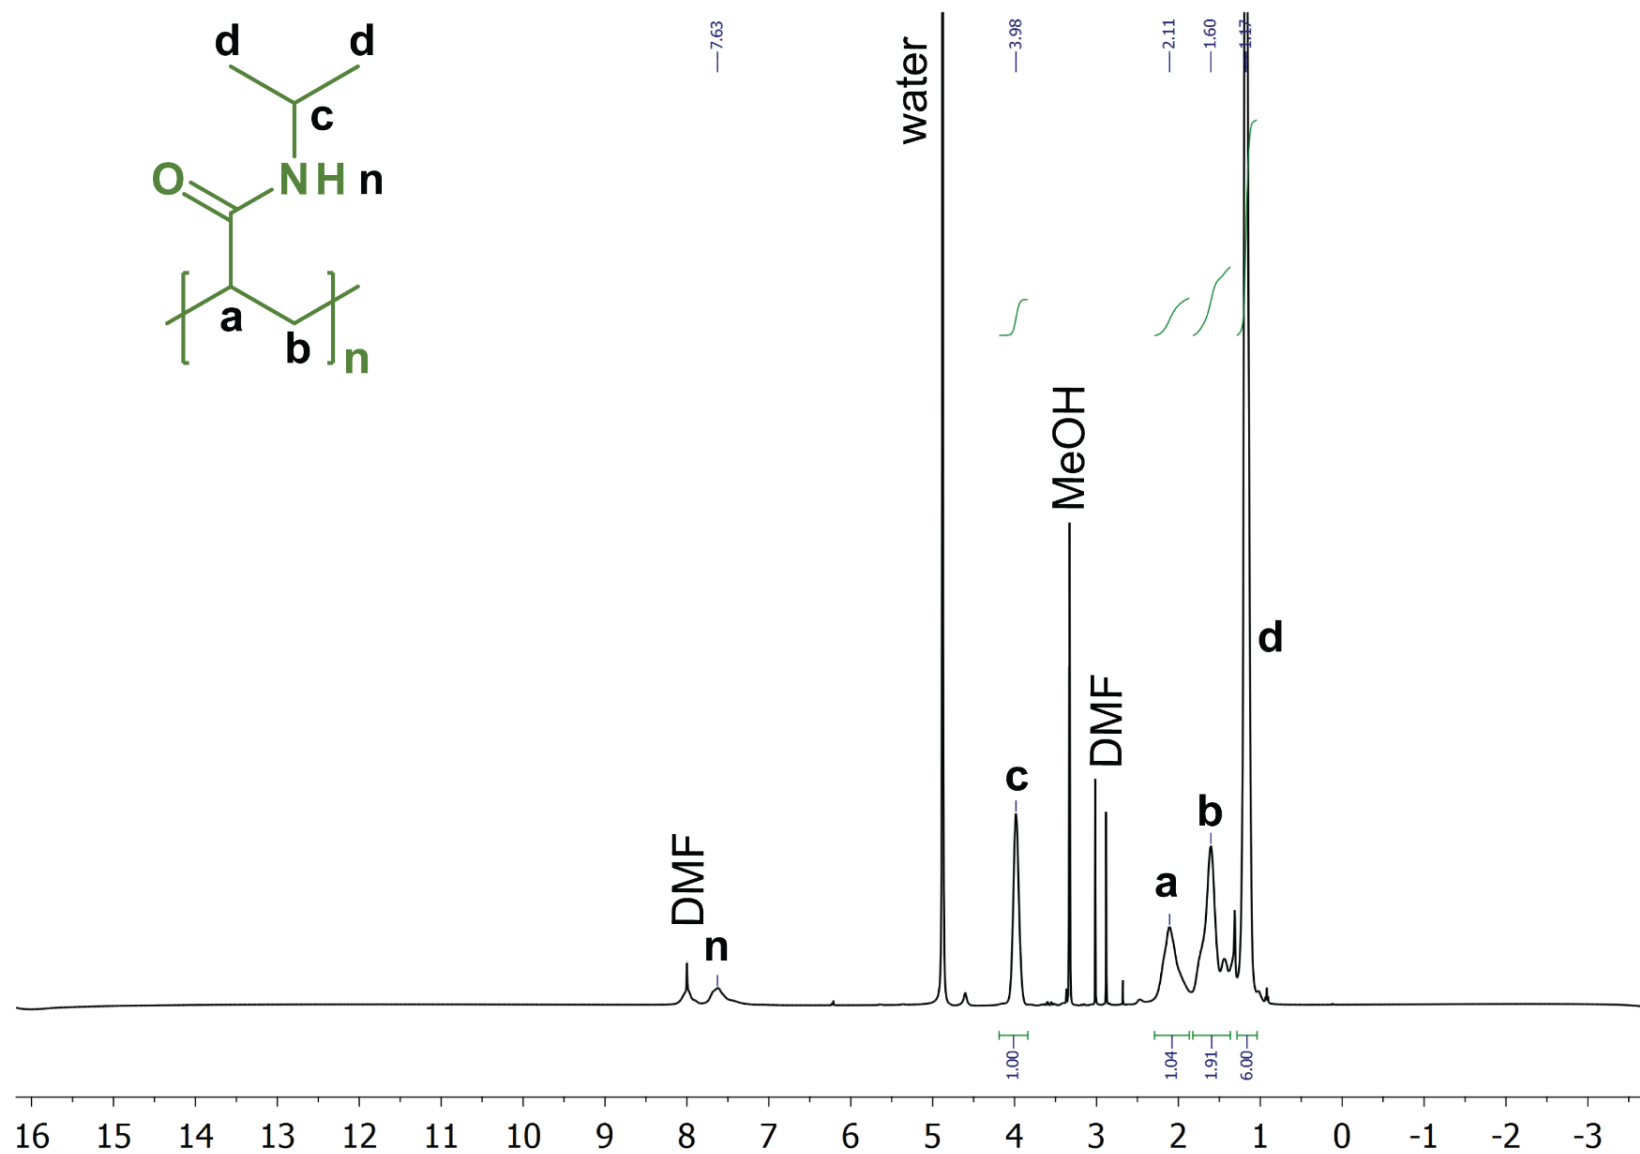

**Figure S12.**  $^1\text{H}$  NMR (400 MHz) spectrum of the **pNIPAM** polymer in  $\text{MeOH-d}_4$ : 7.63 (1H), 3.98 (1H), 2.11 (1H), 1.60 (2H), and 1.17 ppm (6H)

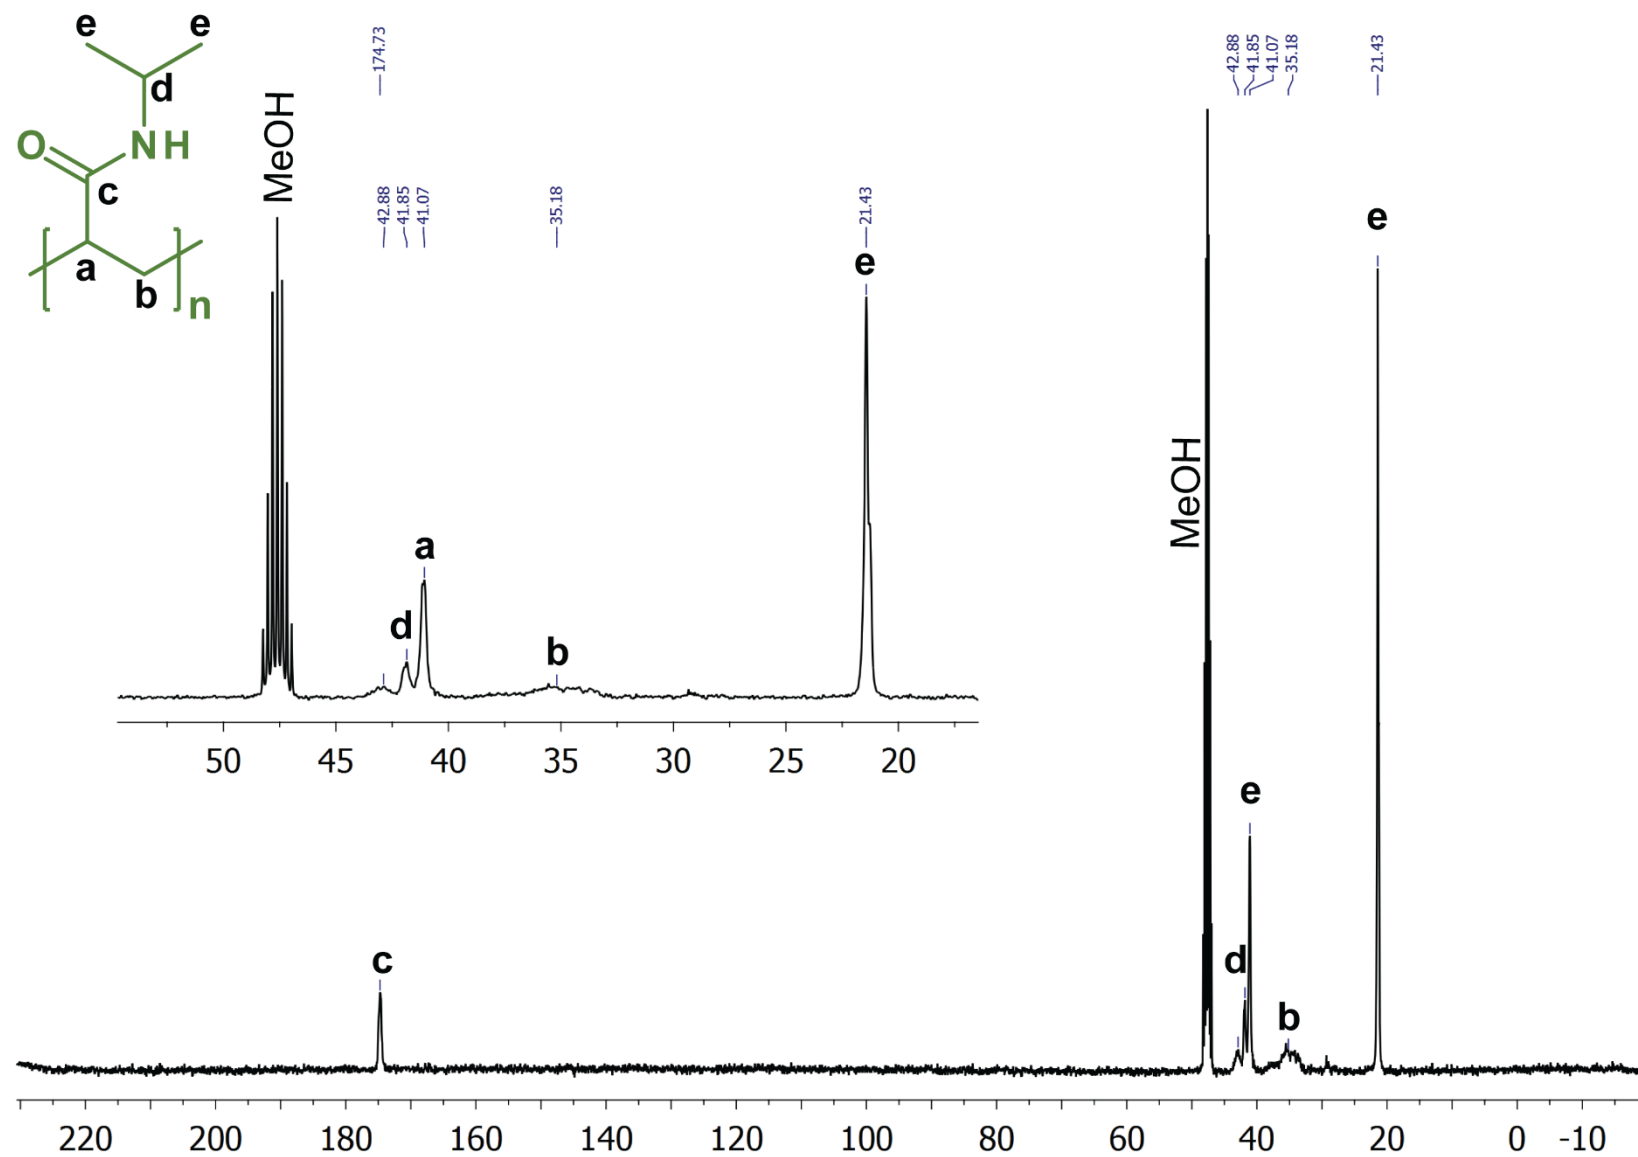

**Figure S13.**  $^{13}\text{C}\{^1\text{H}\}$  NMR (101 MHz) spectrum of the **pNIPAM** polymer in  $\text{MeOH-4d}$ : 174.8, 42.9, 41.1-41.9, 35.0, and 21.4 ppm

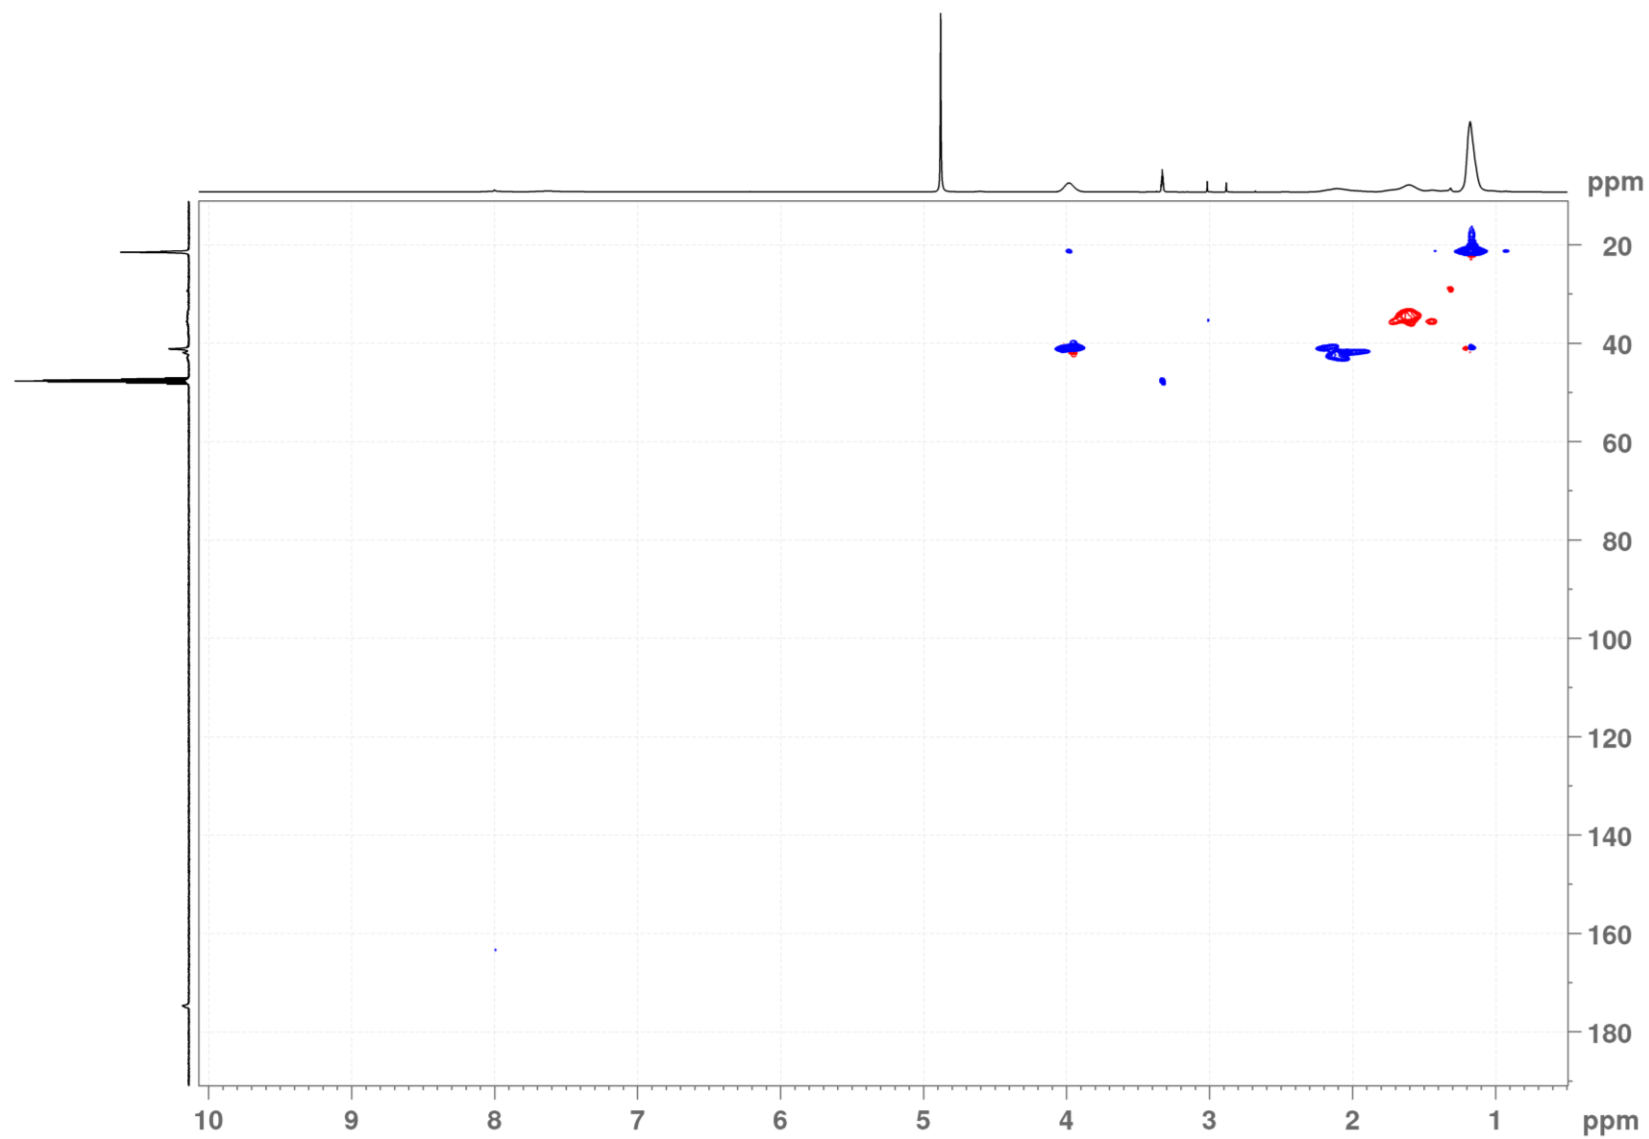

**Figure S14.** Multiplicity-edited HSQC NMR (400 MHz) spectrum of the **pNIPAM** polymer in MeOH-*d*<sub>4</sub>; negative values (**red**) indicate CH<sub>2</sub> moieties, while positive values (**blue**) indicate CH or CH<sub>3</sub> moieties.

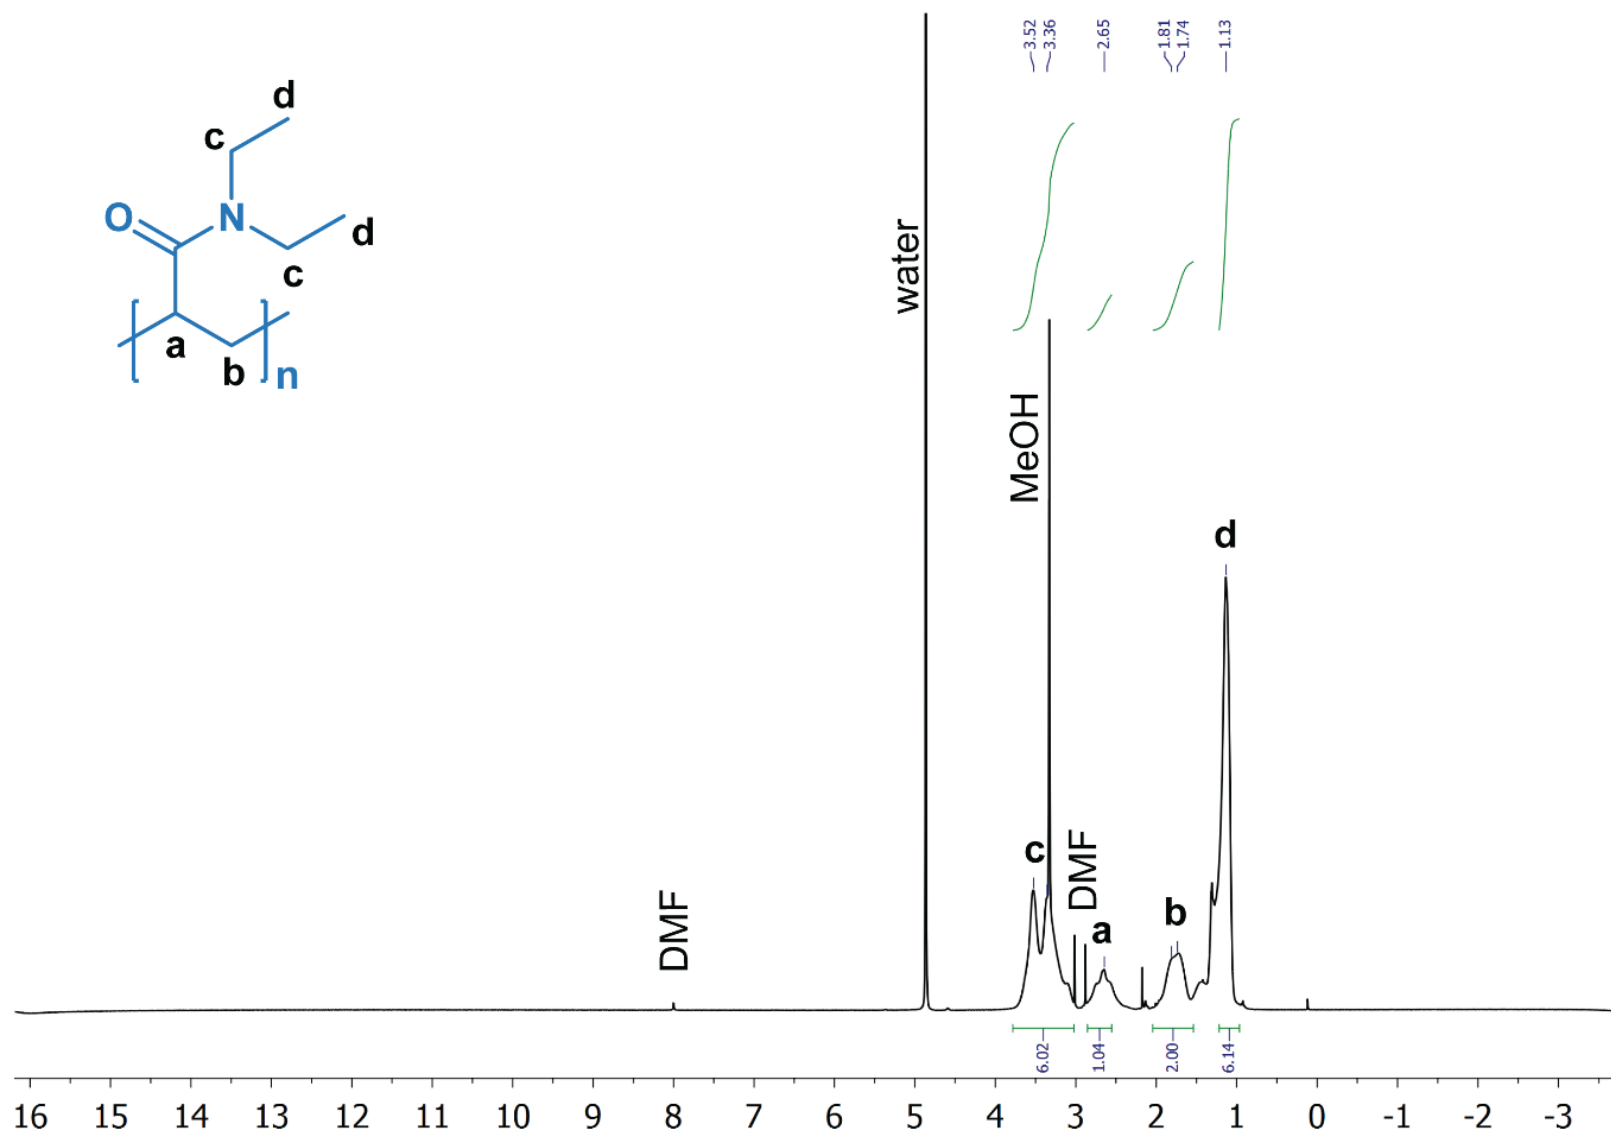

**Figure S15.**  $^1\text{H}$  NMR (400 MHz) spectrum of the pDEA polymer in MeOH-4d: 3.52-3.36 (4H), 2.65 (1H), 1.74-1.81 (2H), and 1.13 ppm (6H)

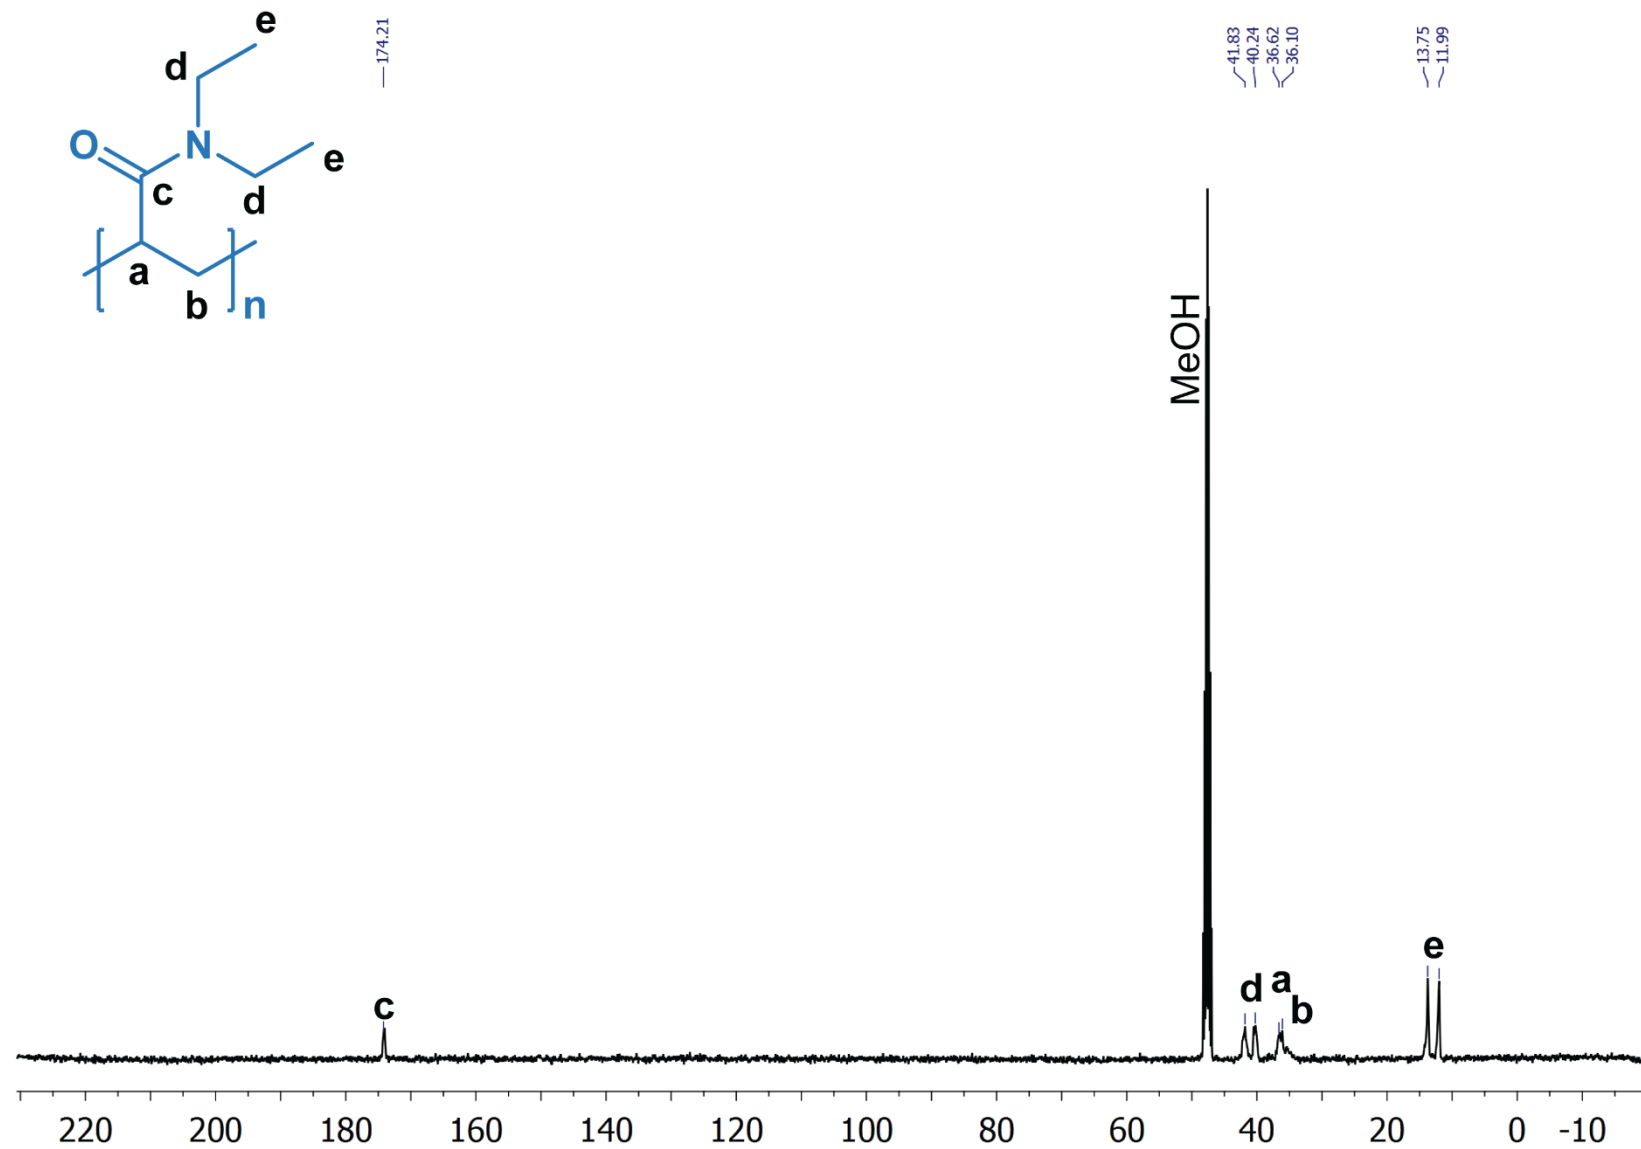

**Figure S16.**  $^{13}\text{C}\{^1\text{H}\}$  NMR (101 MHz) spectrum of the pDEA polymer in MeOH-4d: 174.2, 40.2-41.8, 36.6, 36.1, and 12.0-13.8 ppm

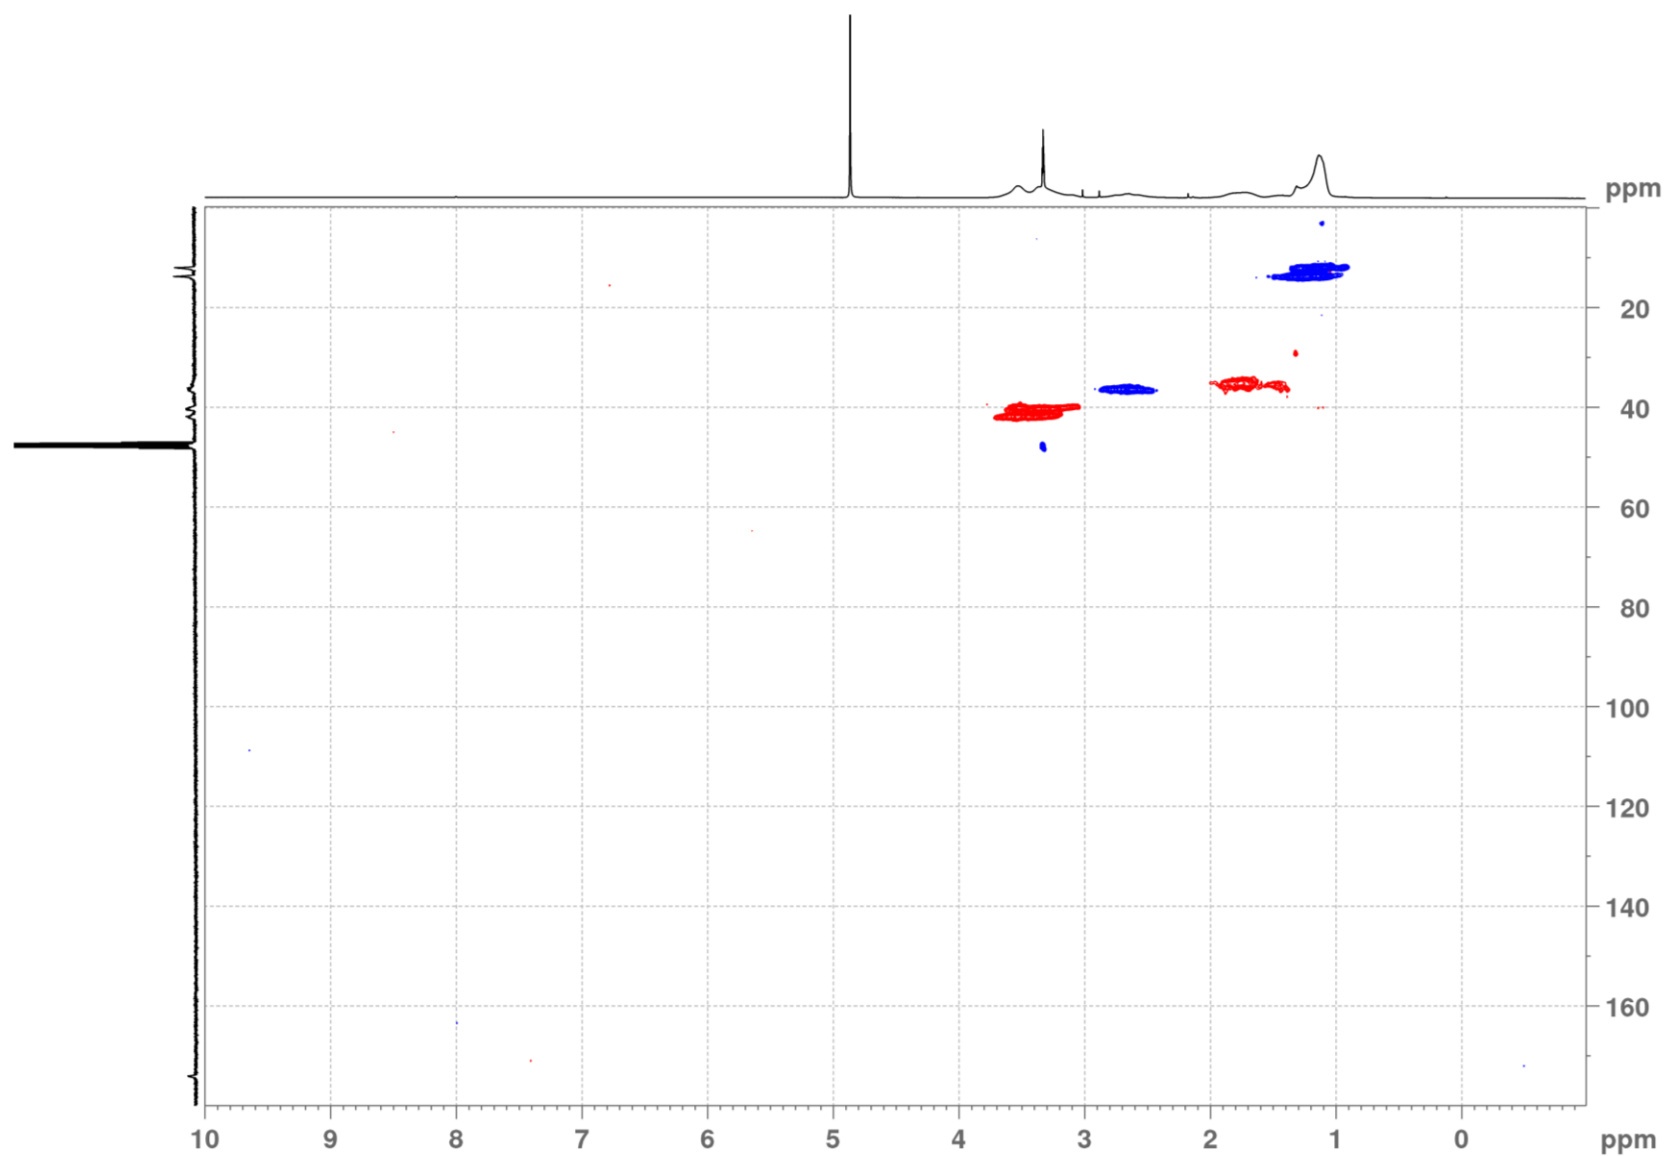

**Figure S17.** Multiplicity-edited HSQC NMR (400 MHz) spectrum of the **pDEA** polymer in MeOH-4d; negative values (**red**) indicate CH<sub>2</sub> moieties, while positive values (**blue**) indicate CH or CH<sub>3</sub> moieties.

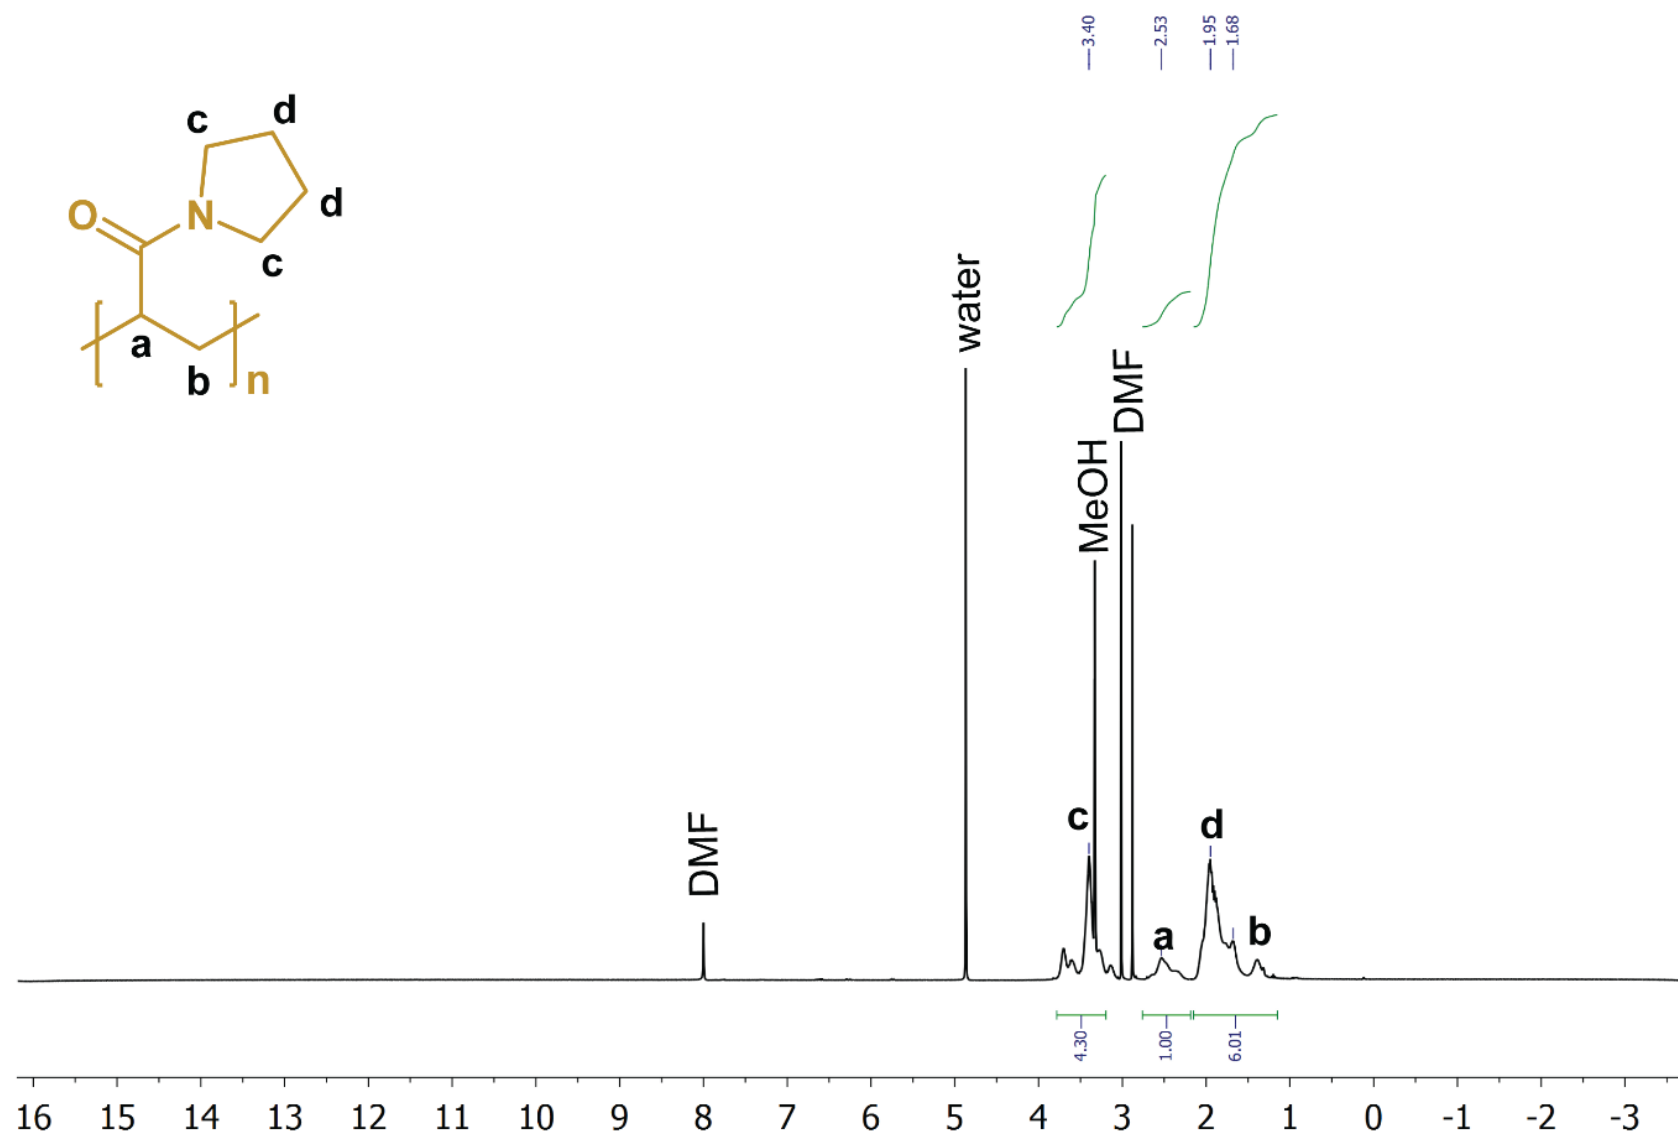

**Figure S18.**  $^1\text{H}$  NMR (400 MHz) spectrum of the pAP polymer in MeOH-4d: 3.1-3.8 (4H), 2.3-2.7 (1H), 1.96 (4H), and 1.68 ppm (2H)

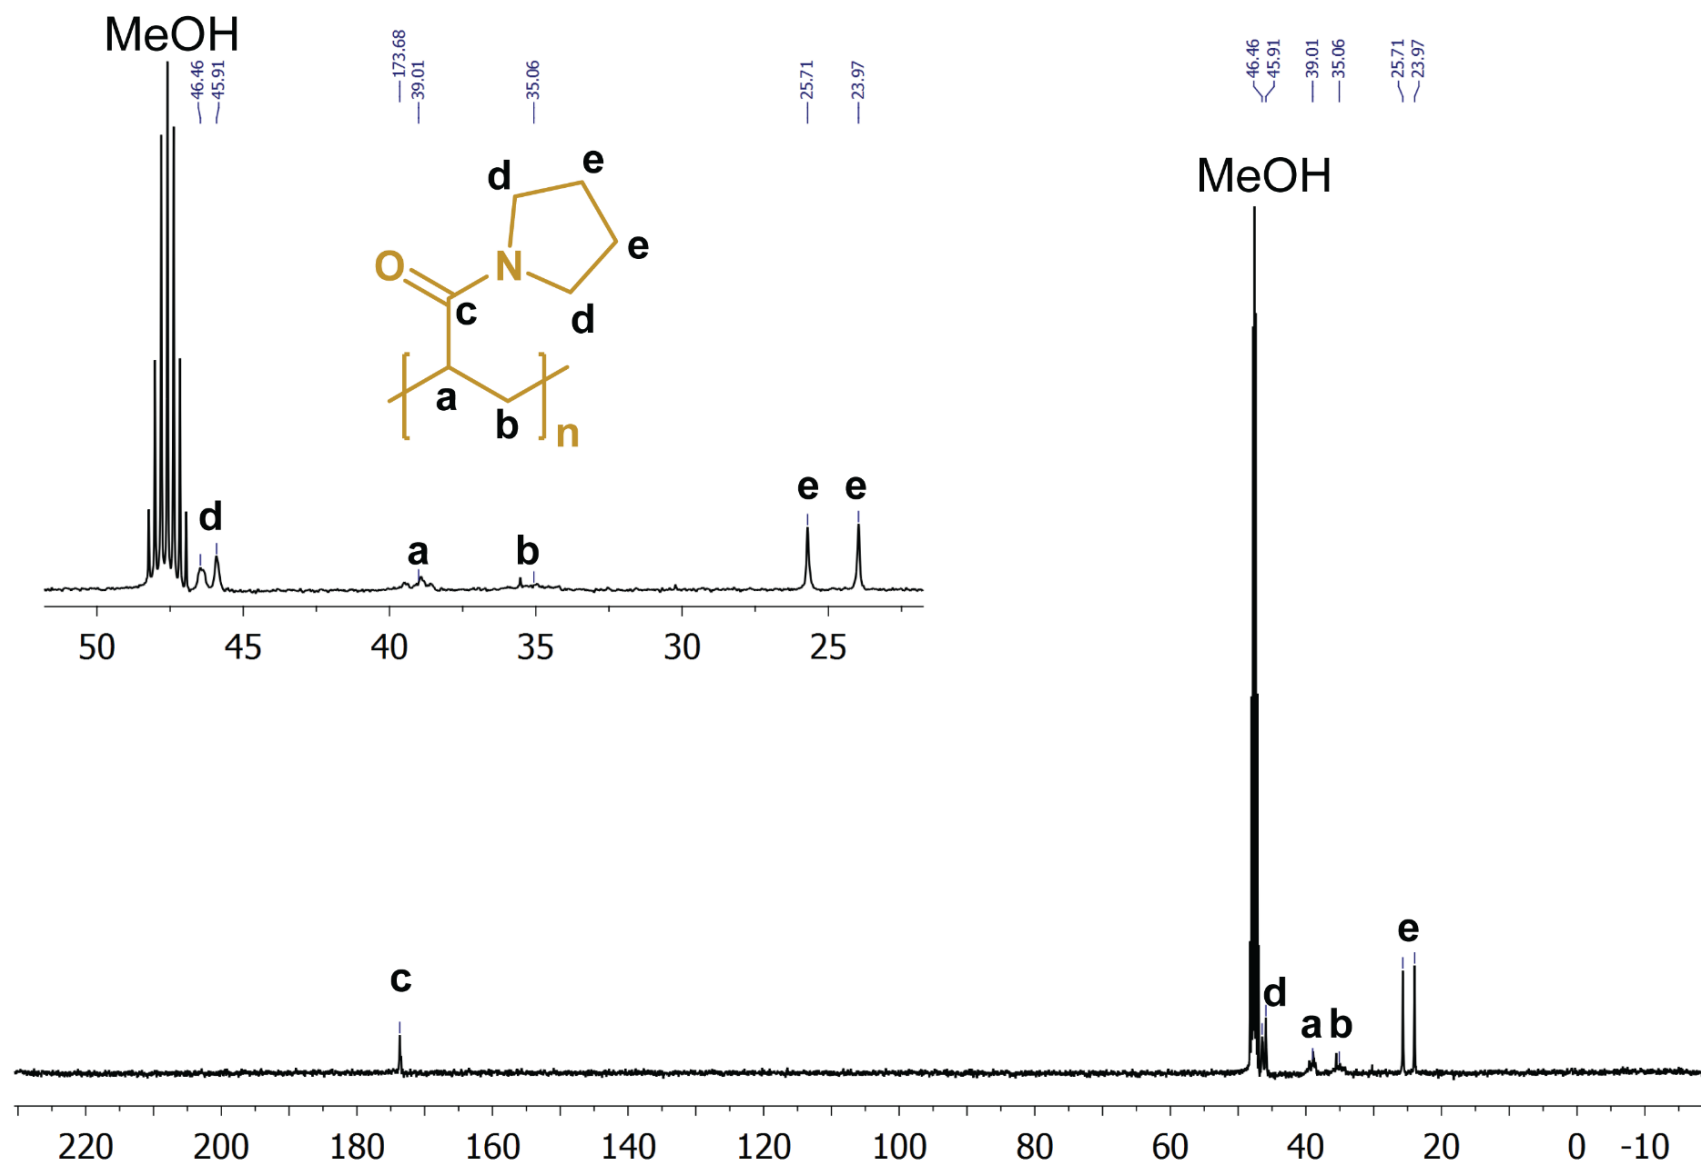

**Figure S19.**  $^{13}\text{C}\{^1\text{H}\}$  NMR (101 MHz) spectrum of the pAP polymer in MeOH-4d: 173.7, 45.9-46.5, 39.0, 35.0, 24.0-25.7 ppm



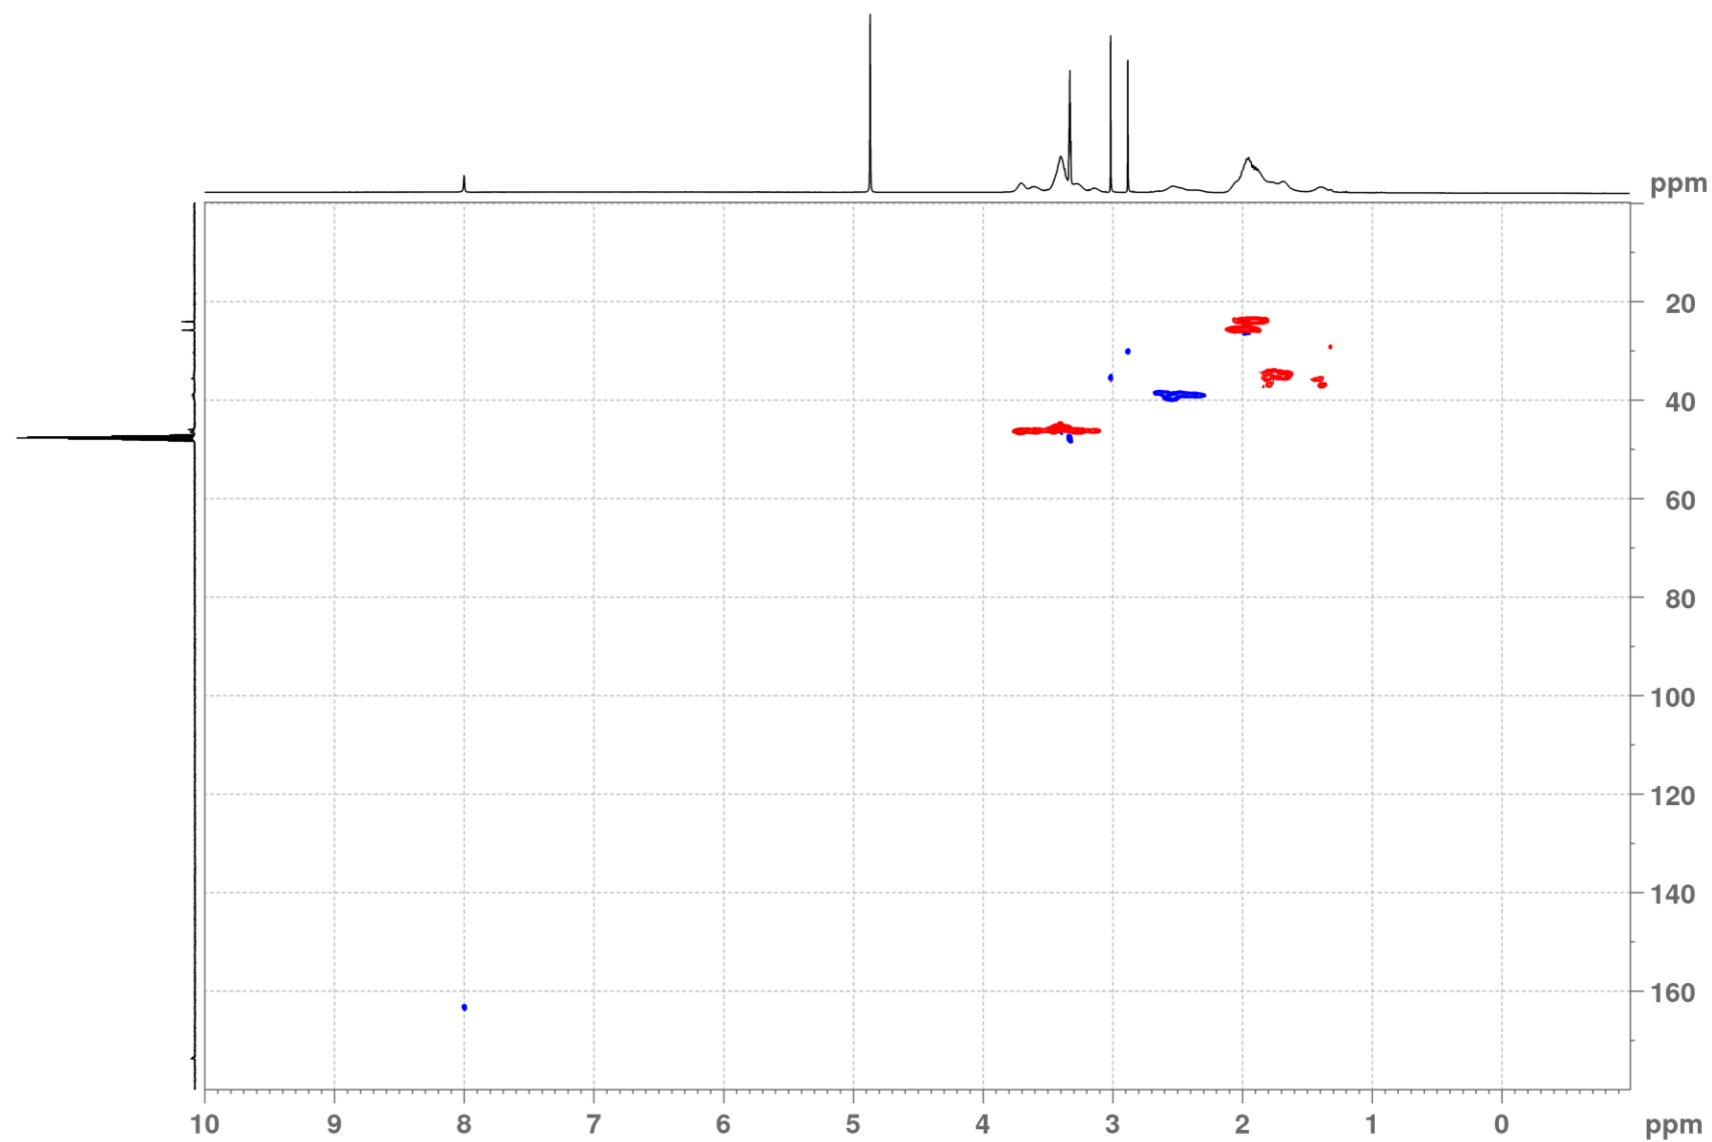

**Figure S20.** Multiplicity-edited HSQC NMR (400 MHz) spectrum of the **pAP** polymer in MeOH-4d; negative values (**red**) indicate CH<sub>2</sub> moieties, while positive values (**blue**) indicate CH or CH<sub>3</sub> moieties.

**S4. Size exclusion chromatograms (SEC traces)**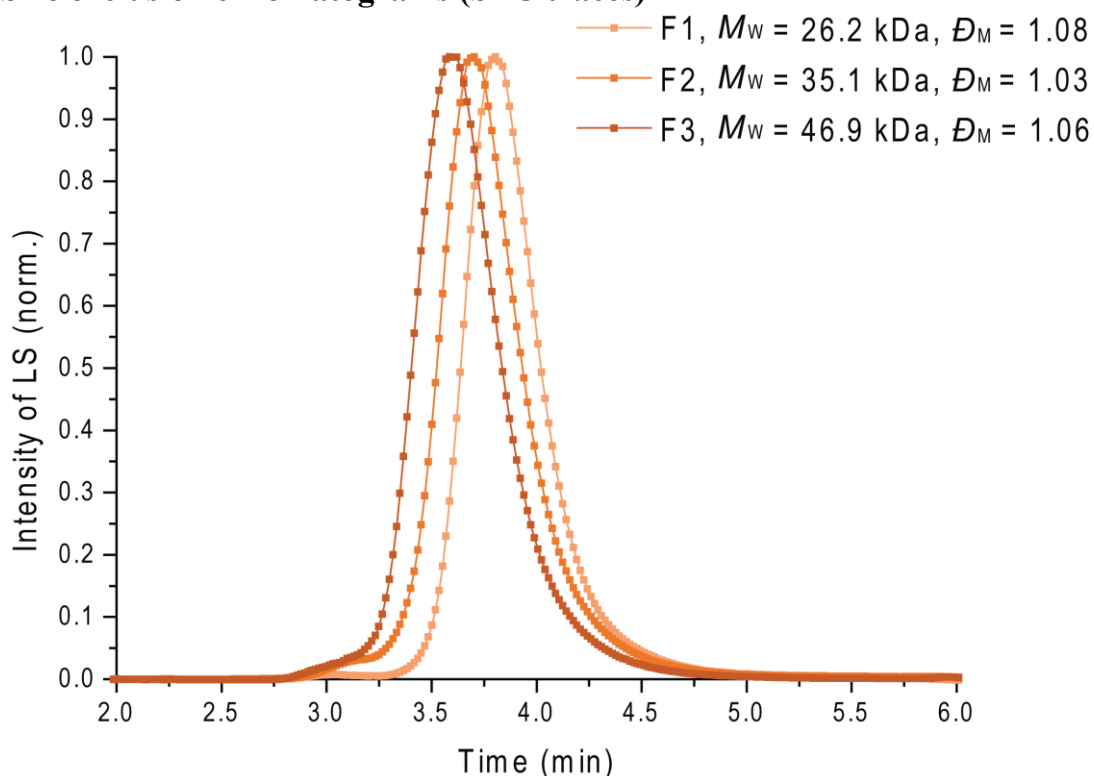

**Figure S21.** Size exclusion chromatograms of **pDFEA** polymers; mobile phase methanol and sodium acetate buffer (0.3 M, pH 6.5) mixture (80:20 v/v, flow rate of  $0.6 \text{ mL} \cdot \text{min}^{-1}$ ). These data were subsequently used to determine the  $M_w$ ,  $M_n$ , and dispersity ( $D_M$ ) of the polymers

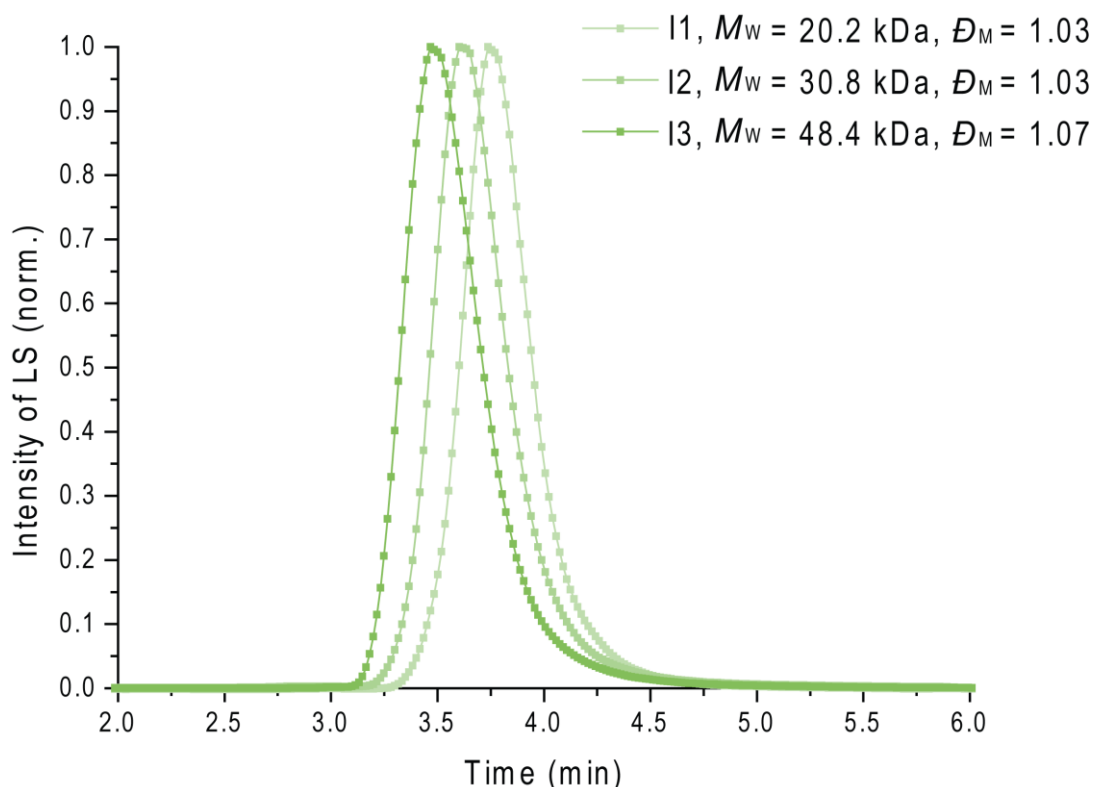

**Figure S22.** Size exclusion chromatograms of **pNIPAM** polymers; mobile phase methanol and sodium acetate buffer (0.3 M, pH 6.5) mixture (80:20 v/v, flow rate of  $0.6 \text{ mL} \cdot \text{min}^{-1}$ ). These data were subsequently used to determine the  $M_w$ ,  $M_n$ , and dispersity ( $D_M$ ) of the polymers

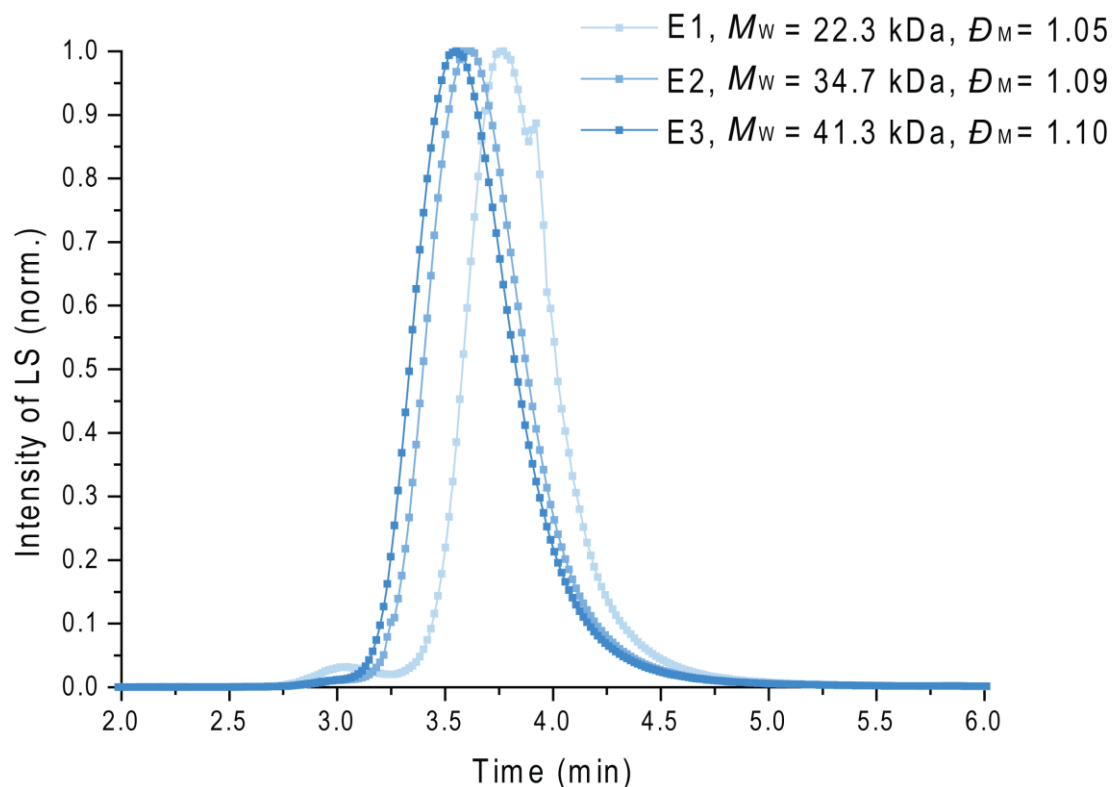

**Figure S23.** Size exclusion chromatograms of **pDEA** polymers; mobile phase methanol and sodium acetate buffer (0.3 M, pH 6.5) mixture (80:20 v/v, flow rate of 0.6 mL·min<sup>-1</sup>). These data were subsequently used to determine the  $M_w$ ,  $M_n$ , and dispersity ( $\mathcal{D}_M$ ) of the polymers

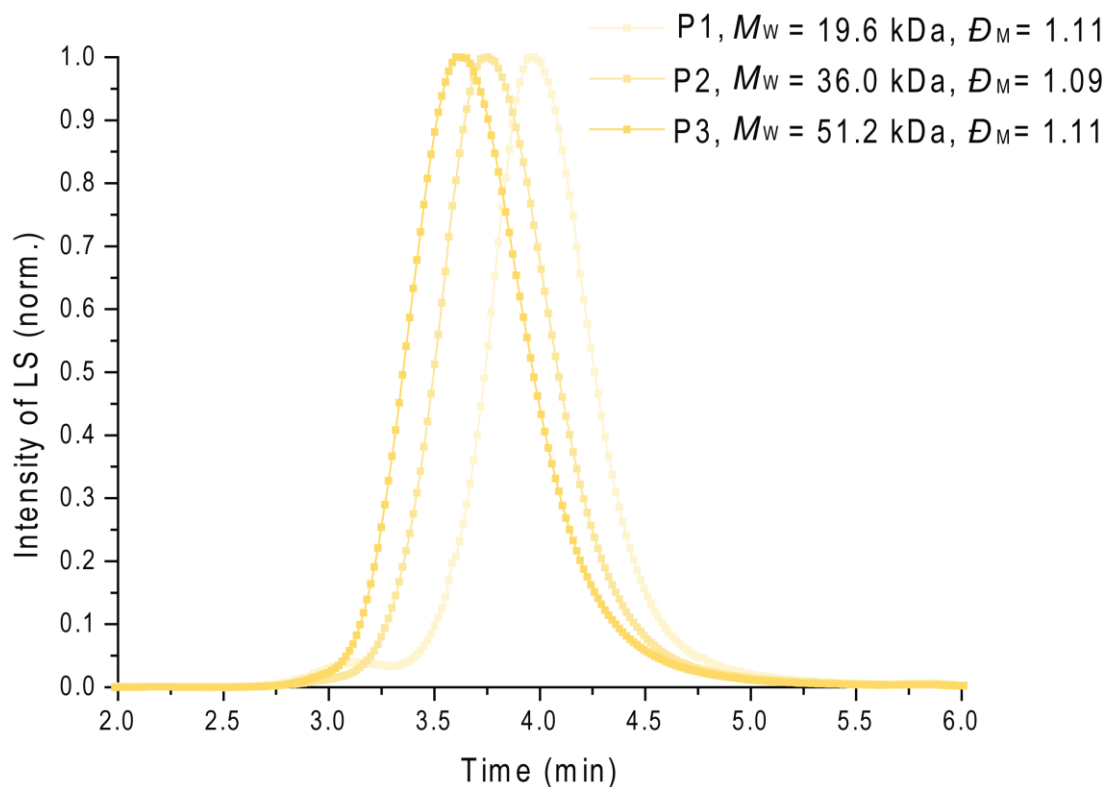

**Figure S24.** Size exclusion chromatograms of **pAP** polymers; mobile phase methanol and sodium acetate buffer (0.3 M, pH 6.5) mixture (80:20 v/v, flow rate of 0.6 mL·min<sup>-1</sup>). These data were subsequently used to determine the  $M_w$ ,  $M_n$ , and dispersity ( $\mathcal{D}_M$ ) of the polymers

## S5. Turbidimetric data – tables

**Table S3.**  $T_{CP}$  values in various solvents (water, PBS and FBS) as a function of the concentration of **pDfEA** polymers (**F1**, **F2**, and **F3**); the data are expressed as mean of 6 experiments and their standard deviation (SD). An asterisk (\*) indicates concentration points with multiple outlier points, which were discarded.

| Polymer<br><i>c</i> (mg/ml) | F1 (°C)<br>$T_{CP} \pm SD$ | F2 (°C)<br>$T_{CP} \pm SD$ | F3 (°C)<br>$T_{CP} \pm SD$ | F1 (°C)<br>$T_{CP} \pm SD$ | F2 (°C)<br>$T_{CP} \pm SD$ | F3 (°C)<br>$T_{CP} \pm SD$ | F1 (°C)<br>$T_{CP} \pm SD$ | F2 (°C)<br>$T_{CP} \pm SD$ | F3 (°C)<br>$T_{CP} \pm SD$ |
|-----------------------------|----------------------------|----------------------------|----------------------------|----------------------------|----------------------------|----------------------------|----------------------------|----------------------------|----------------------------|
| Medium                      | Ultrapure water            |                            |                            | Phosphate saline buffer    |                            |                            | Foetal Bovine Serum        |                            |                            |
| 1.25                        | -                          | -                          | -                          | 64.07 ± 0.05               | 55.25 ± 0.04               | 52.22 ± 0.04               | 33.85 ± 0.10               | 48.00 ± 0.17               | 49.97 ± 0.35               |
| 2.50                        | -                          | -                          | -                          | 27.07 ± 0.23               | 30.75 ± 0.12               | 42.32 ± 0.25               | 28.25 ± 0.19               | 37.90 ± 0.23               | 34.60 ± 0.11               |
| 5.0                         | -                          | -                          | -                          | 29.17 ± 0.14               | 29.95 ± 0.10               | 42.08 ± 0.24               | 24.58 ± 0.08               | 32.52 ± 0.10               | 29.99 ± 0.08               |
| 10.0                        | 27.21 ± 0.62               | 34.00 ± 0.90               | 27.33 ± 0.68               | 27.05 ± 0.25               | 29.30 ± 0.11               | 42.48 ± 0.43               | 22.60 ± 0.06               | 30.10 ± 0.22               | 28.67 ± 0.10               |
| 20.0                        | -                          | -                          | -                          | 25.57 ± 0.05               | 31.64 ± 0.20               | 43.88 ± 0.23               | 24.63 ± 0.15               | 28.87 ± 0.12               | 40.35 ± 0.10*              |
| 40.0                        | -                          | -                          | -                          | 24.14 ± 0.10               | 24.96 ± 0.36               | 26.73 ± 0.29               | 24.90 ± 0.35               | 28.41 ± 0.08               | 43.80 ± 0.14               |

**Table S4.**  $T_{CP}$  values in various solvents (water, PBS and FBS) as a function of the concentration of **pNIPAM** polymers (**I1**, **I2**, and **I3**); the data are expressed as mean of 6 experiments and their standard deviation (SD). An asterisk (\*) indicates concentration points with multiple outlier points, which were discarded.

| Polymer<br><i>c</i> (mg/ml) | I1 (°C)<br>$T_{CP} \pm SD$ | I2 (°C)<br>$T_{CP} \pm SD$ | I3 (°C)<br>$T_{CP} \pm SD$ | I1 (°C)<br>$T_{CP} \pm SD$ | I2 (°C)<br>$T_{CP} \pm SD$ | I3 (°C)<br>$T_{CP} \pm SD$ | I1 (°C)<br>$T_{CP} \pm SD$ | I2 (°C)<br>$T_{CP} \pm SD$ | I3 (°C)<br>$T_{CP} \pm SD$ |
|-----------------------------|----------------------------|----------------------------|----------------------------|----------------------------|----------------------------|----------------------------|----------------------------|----------------------------|----------------------------|
| Medium                      | Ultrapure water            |                            |                            | Phosphate saline buffer    |                            |                            | Foetal Bovine Serum        |                            |                            |
| 1.25                        | -                          | -                          | -                          | 33.42 ± 0.04               | 30.98 ± 0.04               | 29.65 ± 0.10               | 33.62 ± 0.08               | 30.88 ± 0.04               | 29.72 ± 0.04               |
| 2.50                        | -                          | -                          | -                          | 32.25 ± 0.18               | 30.18 ± 0.11               | 29.13 ± 0.05               | 30.90 ± 0.15               | 28.62 ± 0.10               | 27.64 ± 0.05               |
| 5.0                         | -                          | -                          | -                          | 31.08 ± 0.10               | 29.48 ± 0.08               | 28.75 ± 0.05               | 28.98 ± 0.10               | 26.30 ± 0.11               | 25.70 ± 0.06               |
| 10.0                        | 29.98 ± 0.27               | 31.39 ± 0.17               | 31.59 ± 0.43               | 29.25 ± 0.10               | 28.30 ± 0.06               | 28.05 ± 0.10               | 25.67 ± 0.10               | 24.39 ± 0.10               | 24.60 ± 0.06               |
| 20.0                        | -                          | -                          | -                          | 28.95 ± 0.05               | 26.80 ± 0.00               | 28.29 ± 0.04               | 28.90 ± 0.09               | 29.23 ± 0.15               | 33.05 ± 0.32               |
| 40.0                        | -                          | -                          | -                          | 26.90 ± 0.34               | 28.37 ± 0.05               | 28.28 ± 0.04               | 28.82 ± 0.34               | 28.43 ± 0.16               | 31.03 ± 0.13               |

**Table S5.**  $T_{CP}$  values in various solvents (water, PBS and FBS) as a function of the concentration of **pDEA** polymers (**E1**, **E2**, and **E3**); the data are expressed as mean of 6 experiments and their standard deviation (SD). An asterisk (\*) indicates concentration points with multiple outlier points, which were discarded.

| Polymer<br><i>c</i> (mg/ml) | E1 (°C)<br>$T_{CP} \pm SD$ | E2 (°C)<br>$T_{CP} \pm SD$ | E3 (°C)<br>$T_{CP} \pm SD$ | E1 (°C)<br>$T_{CP} \pm SD$ | E2 (°C)<br>$T_{CP} \pm SD$ | E3 (°C)<br>$T_{CP} \pm SD$ | E1 (°C)<br>$T_{CP} \pm SD$ | E2 (°C)<br>$T_{CP} \pm SD$ | E3 (°C)<br>$T_{CP} \pm SD$ |
|-----------------------------|----------------------------|----------------------------|----------------------------|----------------------------|----------------------------|----------------------------|----------------------------|----------------------------|----------------------------|
| Medium                      | Ultrapure water            |                            |                            | Phosphate saline buffer    |                            |                            | Foetal Bovine Serum        |                            |                            |
| 1.25                        | -                          | -                          | -                          | 31.88 ± 0.04               | 31.72 ± 0.04               | 31.17 ± 0.05               | 35.77 ± 0.25               | 32.60 ± 0.24               | 31.53 ± 0.23               |
| 2.50                        | -                          | -                          | -                          | 29.58 ± 0.08               | 30.85 ± 0.08               | 29.30 ± 0.09               | 31.90 ± 0.14               | 30.00 ± 0.20               | 29.12 ± 0.15               |
| 5.0                         | -                          | -                          | -                          | 28.20 ± 0.06               | 29.98 ± 0.04               | 28.35 ± 0.08               | 28.03 ± 0.20               | 27.97 ± 0.16               | 27.07 ± 0.15               |
| 10.0                        | 29.28 ± 0.04               | 30.16 ± 0.11               | 29.92 ± 0.12               | 27.37 ± 0.08               | 28.47 ± 0.10               | 27.60 ± 0.11               | 23.95 ± 0.12               | 25.82 ± 0.17               | 25.27 ± 0.19               |
| 20.0                        | -                          | -                          | -                          | 28.92 ± 0.16*              | 29.17 ± 0.06*              | 29.18 ± 0.05*              | 27.93 ± 0.13               | 29.47 ± 0.09               | 29.34 ± 0.07               |
| 40.0                        | -                          | -                          | -                          | 28.85 ± 1.34*              | 28.75 ± 0.07*              | 28.87 ± 0.06*              | 27.57 ± 0.23               | 28.33 ± 0.05               | 27.88 ± 0.08               |

**Table S6.**  $T_{CP}$  values in various solvents (water, PBS and FBS) as a function of the concentration of **pAP** polymers (**P1**, **P2**, and **P3**); the data are expressed as mean of 6 experiments and their standard deviation (SD). An asterisk (\*) indicates concentration points with multiple outlier points, which were discarded.

| Polymer<br><i>c</i> (mg/ml) | P1 (°C)<br>$T_{CP} \pm SD$ | P2 (°C)<br>$T_{CP} \pm SD$ | P3 (°C)<br>$T_{CP} \pm SD$ | P1 (°C)<br>$T_{CP} \pm SD$ | P2 (°C)<br>$T_{CP} \pm SD$ | P3 (°C)<br>$T_{CP} \pm SD$ | P1 (°C)<br>$T_{CP} \pm SD$ | P2 (°C)<br>$T_{CP} \pm SD$ | P3 (°C)<br>$T_{CP} \pm SD$ |
|-----------------------------|----------------------------|----------------------------|----------------------------|----------------------------|----------------------------|----------------------------|----------------------------|----------------------------|----------------------------|
| Medium                      | Ultrapure water            |                            |                            | Phosphate saline buffer    |                            |                            | Foetal Bovine Serum        |                            |                            |
| 1.25                        | -                          | -                          | -                          | 64.06 ± 0.05               | 55.28 ± 0.06               | 52.22 ± 0.04               | 75.02 ± 0.79               | 59.18 ± 0.08               | 55.31 ± 0.08               |
| 2.50                        | -                          | -                          | -                          | 58.35 ± 0.16               | 52.68 ± 0.08               | 50.23 ± 0.10               | 70.70 ± 0.57               | 53.67 ± 0.19               | 50.55 ± 0.14               |
| 5.0                         | -                          | -                          | -                          | 55.15 ± 0.08               | 49.15 ± 0.10               | 47.73 ± 0.08               | 60.85 ± 0.37               | 51.83 ± 0.08               | 48.53 ± 0.08               |
| 10.0                        | 58.10 ± 0.10               | 56.78 ± 0.42               | 56.2 ± 0.58                | 53.65 ± 0.10               | 47.30 ± 0.17               | 46.27 ± 0.10               | 56.72 ± 0.34               | 48.63 ± 0.14               | 45.73 ± 0.08               |
| 20.0                        | -                          | -                          | -                          | 54.65 ± 0.04               | 50.09 ± 0.02               | 50.13 ± 0.05               | 54.62 ± 0.40               | 58.40 ± 0.14*              | 49.57 ± 0.08               |
| 40.0                        | -                          | -                          | -                          | 54.00 ± 0.14               | 48.38 ± 0.22               | 48.08 ± 0.12               | 49.53 ± 0.38               | 33.65 ± 0.20               | 48.98 ± 0.12               |

**Note:** At high polymer concentrations (20 and 40 mg/mL), the cloud point temperatures were poorly reproducible and unreliable, and the inter-run-differences were up to 20°C (particularly in **pDFEA** in PBS). At low concentrations (1.25 to 10.0 mg/mL), multiple independent experiments provided the same value of  $T_{CP}$  (within a margin of 0.5°C). We kept repeating measurements until two independent runs provided *similar* results and reliable turbidimetry-as-a-function-of-temperature graphs (*i.e.*, the turbidity decreased monotonously and relatively quickly with no sudden or inexplicable changes in trends). Therefore, we concluded that turbidimetry is not a reliable method for determining  $T_{CP}$ s at high polymer concentrations and these data were accordingly disregarded from further interpretations. Nevertheless, we present the complete set of our results in **Tables S3 to S6**.

## S6. Turbidimetric data

Every polymer solution was measured at least 6 times. If the data from all runs were similar, the data was processed: we calculated the mean values and standard deviations of  $T_{\text{CPS}}$  (Table S3 to S6). Only one cycle is shown in Figures S25 to S36 for clarity.

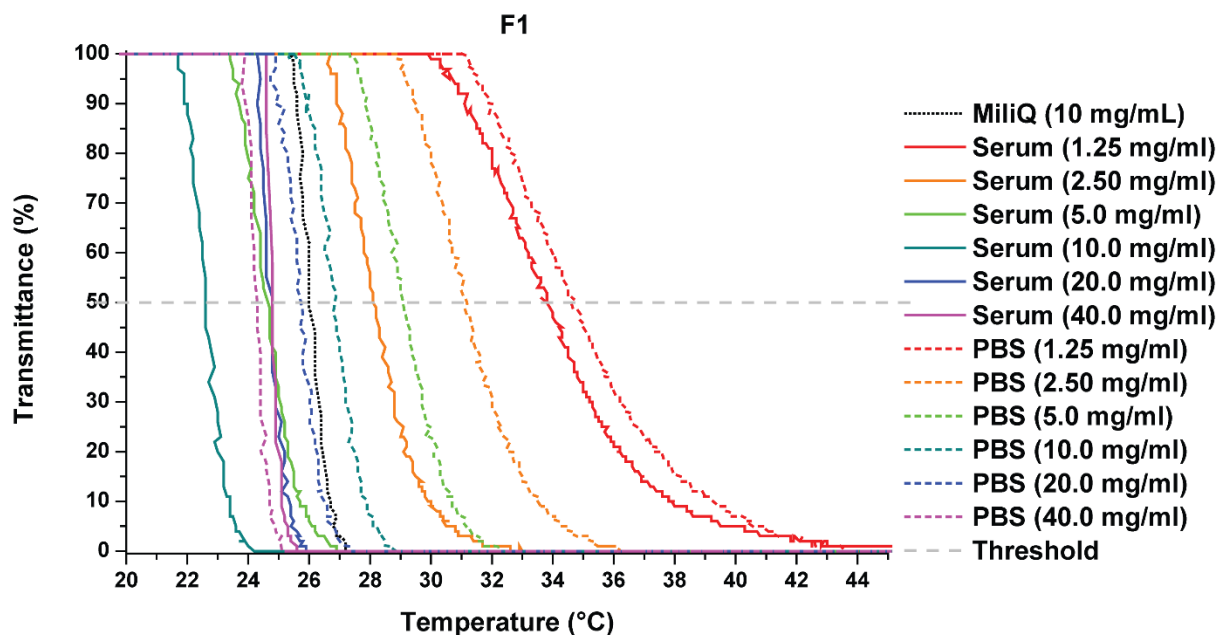

**Figure S25.** Transmittance of the F1 (pDfEA) solution in ultrapure water (MiliQ), PBS, and FBS (serum), respectively, as a function of temperature

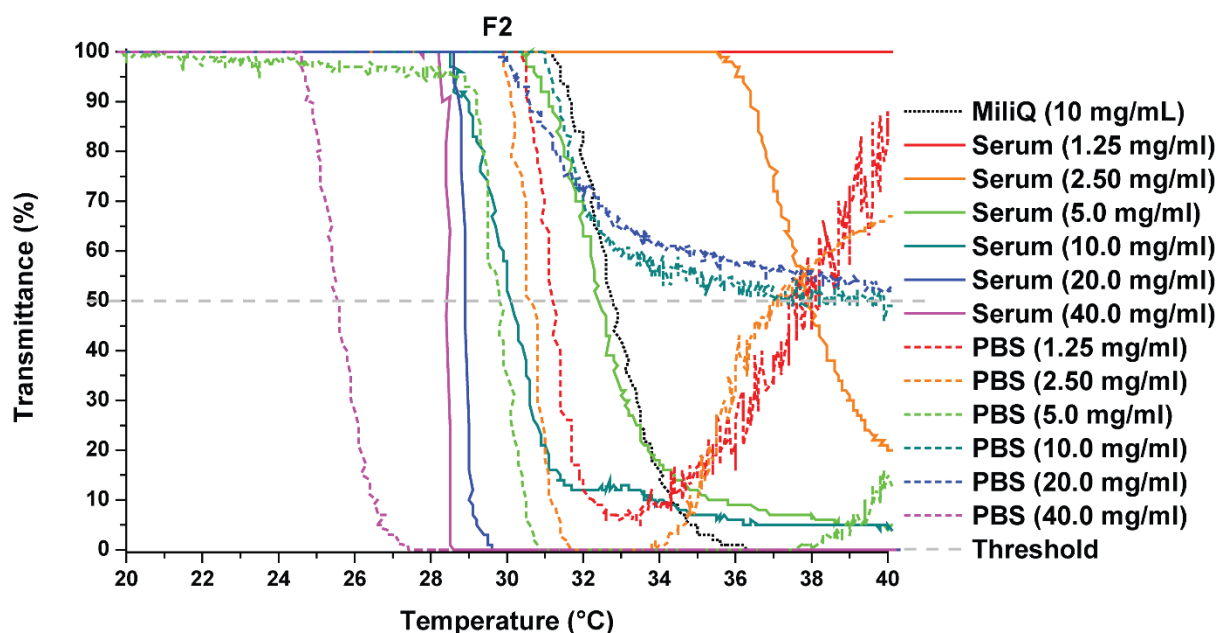

**Figure S26.** Transmittance of the F2 (pDfEA) solution in ultrapure water (MiliQ), PBS, and FBS (serum), respectively, as a function of temperature

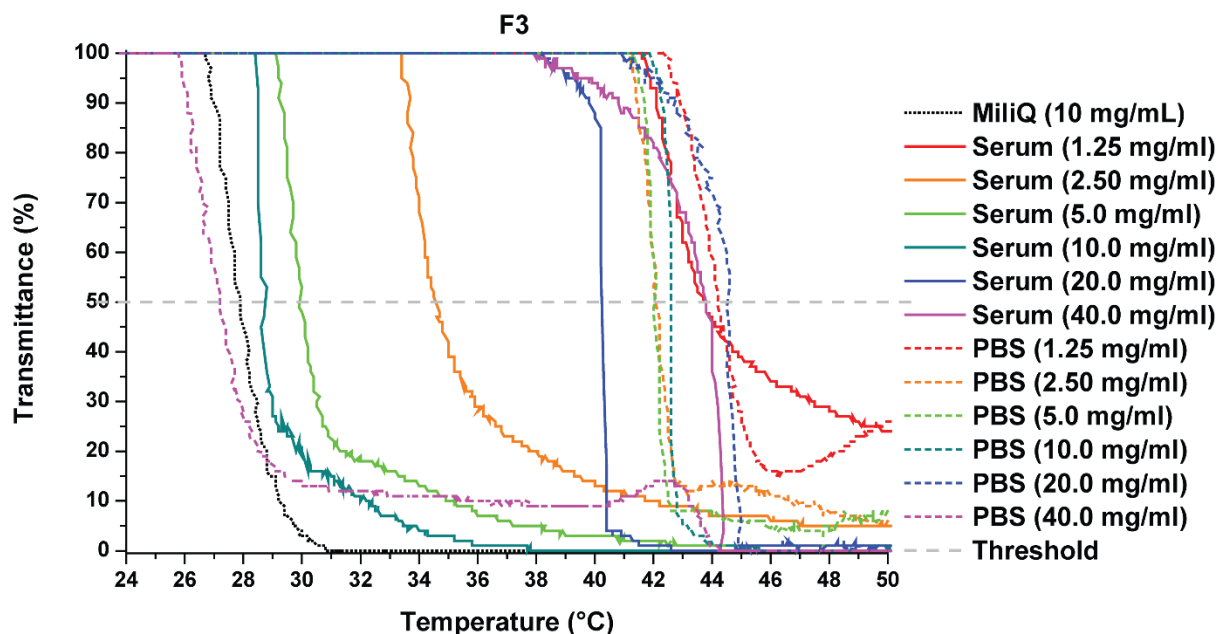

**Figure S27.** Transmittance of the F3 (pDfEA) solution in ultrapure water (MiliQ), PBS, and FBS (serum), respectively, as a function of temperature

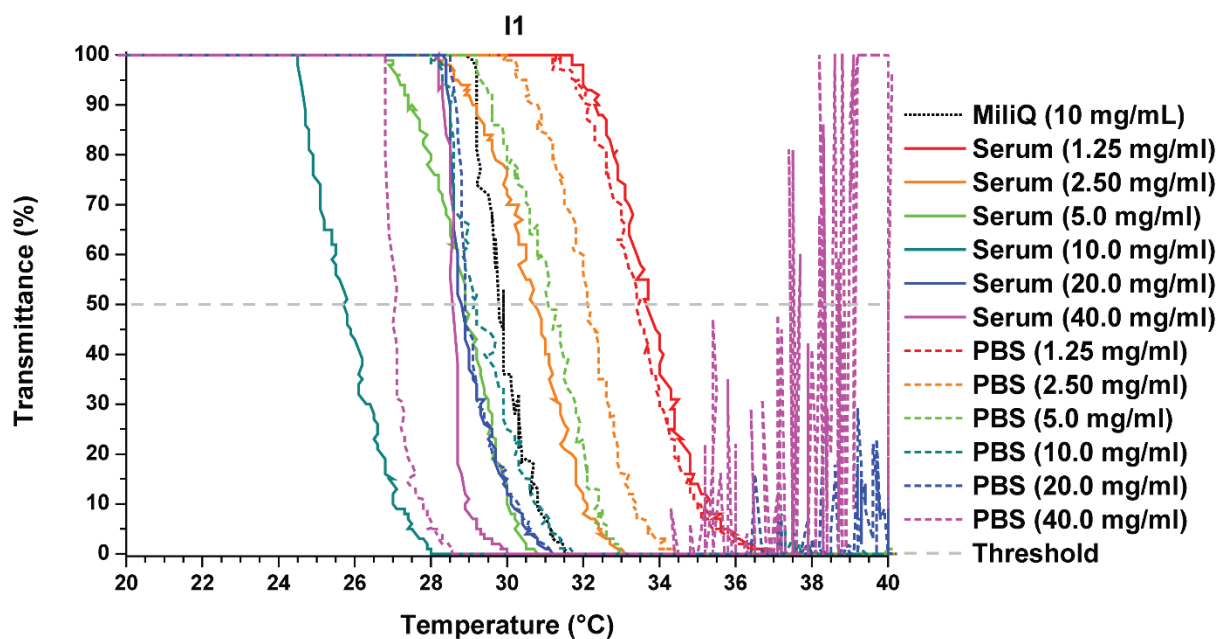

**Figure S28.** Transmittance of the I1 (pNIPAM) solution in ultrapure water (MiliQ), PBS, and FBS (serum), respectively, as a function of temperature

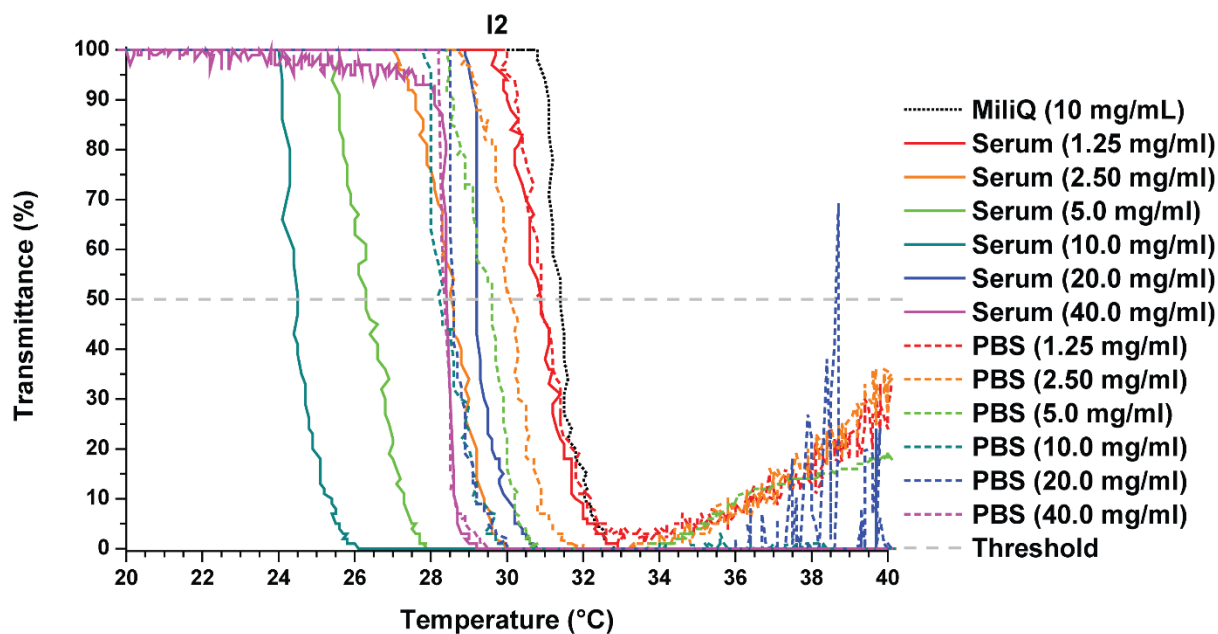

**Figure S29.** Transmittance of the I2 (pNIPAM) solution in ultrapure water (MiliQ), PBS, and FBS (serum), respectively, as a function of temperature

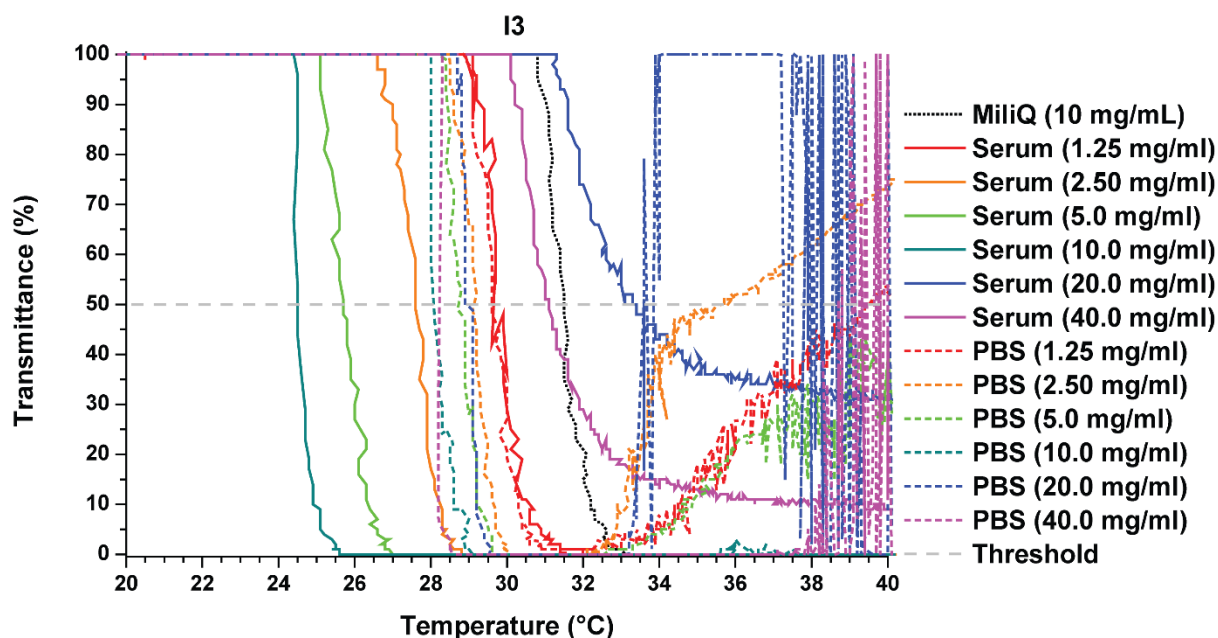

**Figure S30.** Transmittance of the I3 (pNIPAM) solution in ultrapure water (MiliQ), PBS, and FBS (serum), respectively, as a function of temperature



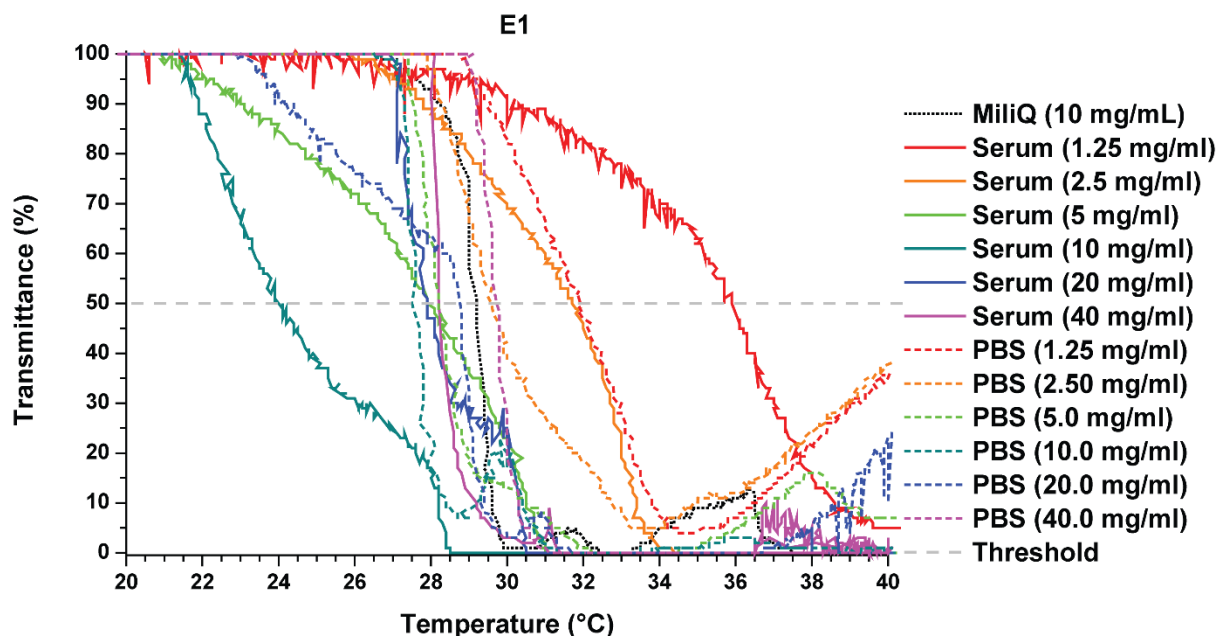

**Figure S31.** Transmittance of the **E1** (**pDEA**) solution in ultrapure water (MiliQ), PBS, and FBS (serum), respectively, as a function of temperature

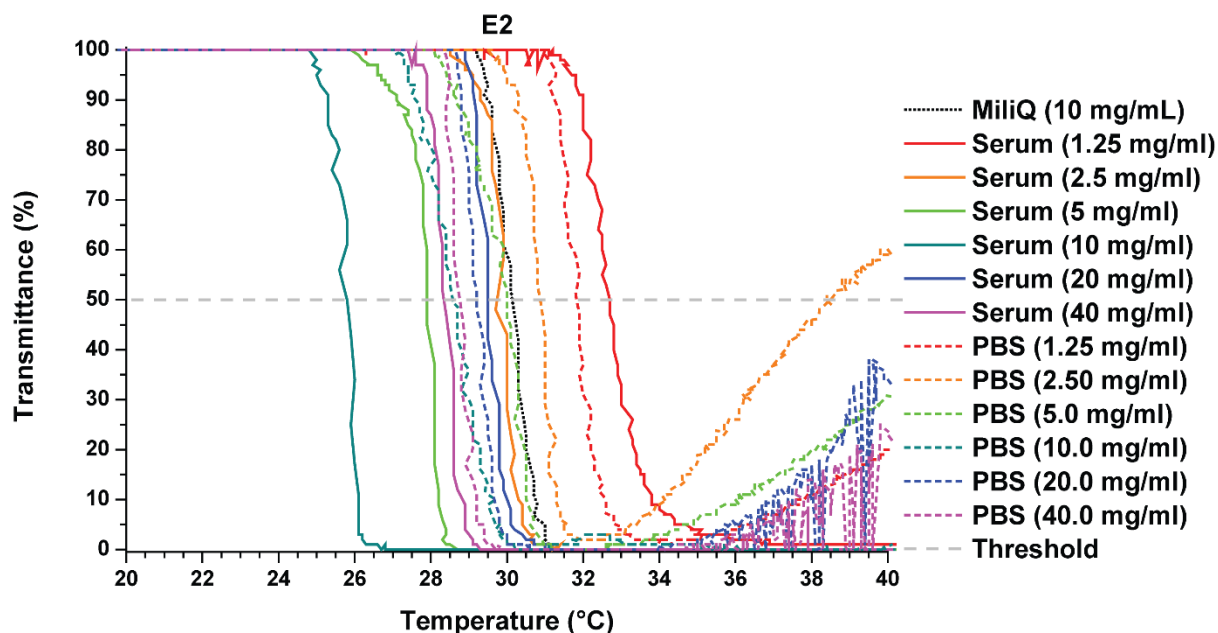

**Figure S32.** Transmittance of the **E2** (**pDEA**) solution in ultrapure water (MiliQ), PBS, and FBS (serum), respectively, as a function of temperature

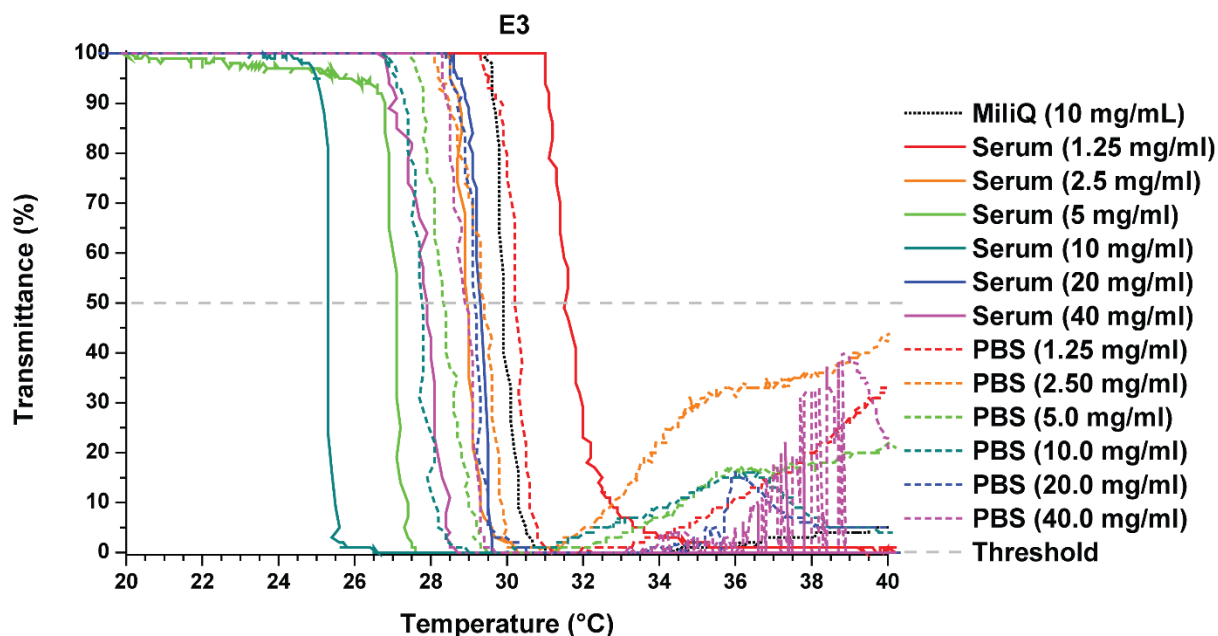

**Figure S33.** Transmittance of the E3 (pDEA) solution in ultrapure water (MiliQ), PBS, and FBS (serum), respectively, as a function of temperature

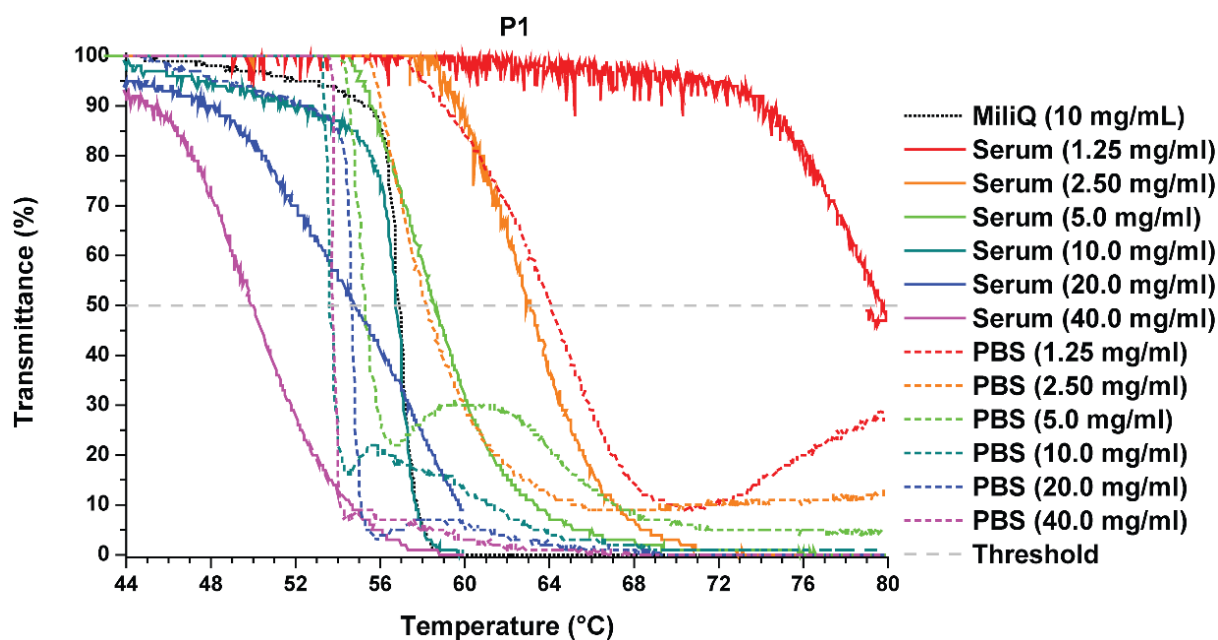

**Figure S34.** Transmittance of the P1 (pAP) solution in ultrapure water (MiliQ), PBS, and FBS (serum), respectively, as a function of temperature

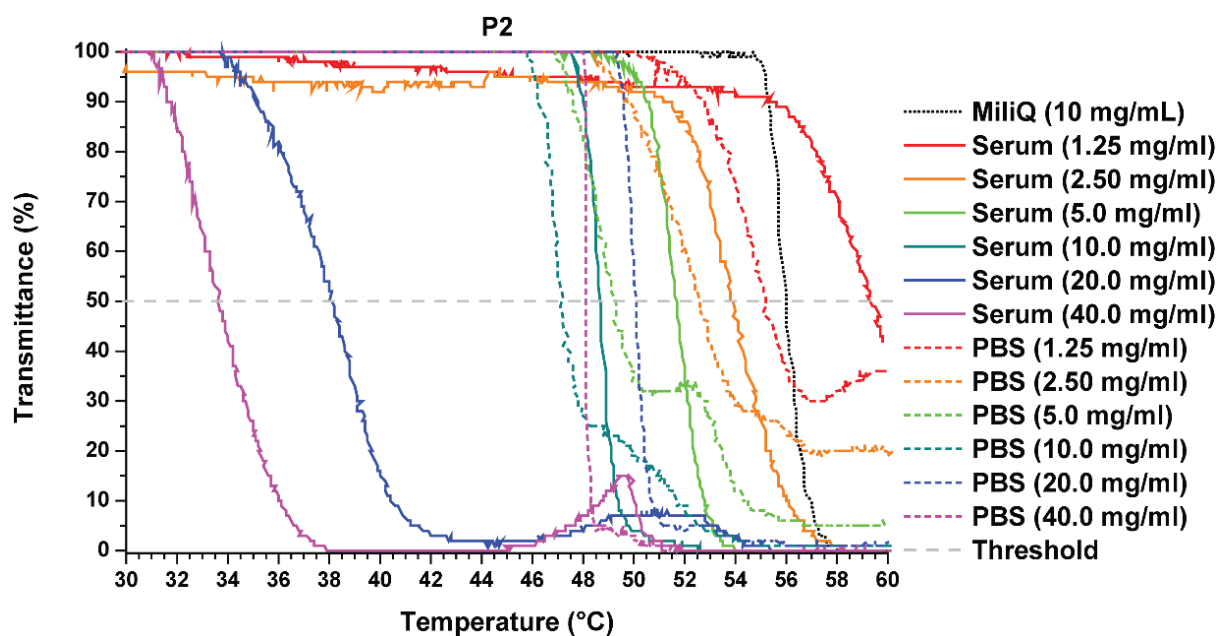

**Figure S35.** Transmittance of the P2 (pAP) solution in ultrapure water (MiliQ), PBS, and FBS (serum), respectively, as a function of temperature

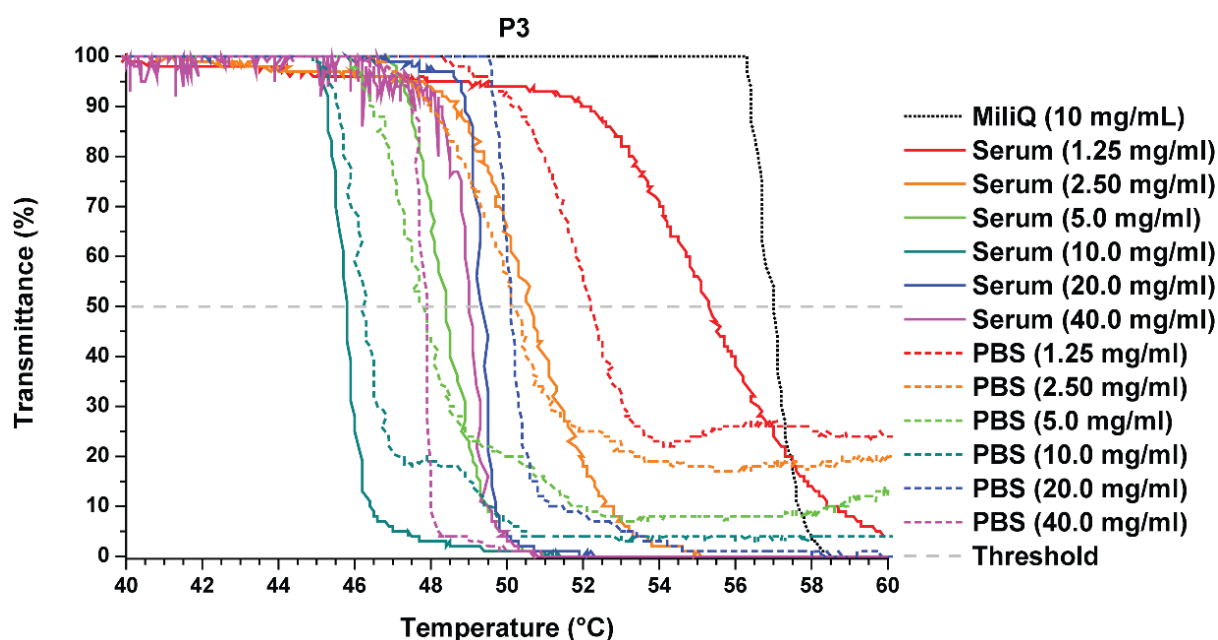

**Figure S36.** Transmittance of the P3 (pAP) solution in ultrapure water (MiliQ), PBS, and FBS (serum), respectively, as a function of temperature

## S7. Isothermal titration calorimetry

Polymers **F1**, **F2**, **F3**, **I3**, **E3**, or **P3** were dissolved in ultrapure water and thermally equilibrated at 3 specific temperatures: (i) below the  $T_{CP}$  of the study polymers in all solvents (no aggregates were visible to the naked eye neither before nor after the titration); (ii) above the  $T_{CP}$  of the polymer in PBS and FBS, but below the  $T_{CP}$  of the polymer in water (titration triggered aggregation); and (iii) above the  $T_{CP}$  of polymer in all solvents (the polymer aggregates were titrated). Subsequently, we disrupted the system equilibrium by consecutively adding small portions of PBS or FBS and measuring the heat flux caused by the establishment of a new equilibrium (see *e.g.* **Figure 5A**, black line). Then, we measured the heat flux corresponding to the PBS or FBS addition to ultrapure water (no added polymer, blank samples; **Figure 5A**, red line) to subtract the heat flux caused by PBS/ FBS dilution. After subtracting the heat flux of the blank sample from the heat flux of the sample solution, we obtained a complex titration isotherm<sup>S13</sup> (**Figure 5B**), with three phases: **I**, **II** and **III** (**Figure 5A**).

### S7.1. ITC – titration of polymers **F3**, **I3**, **E3**, and **P3**

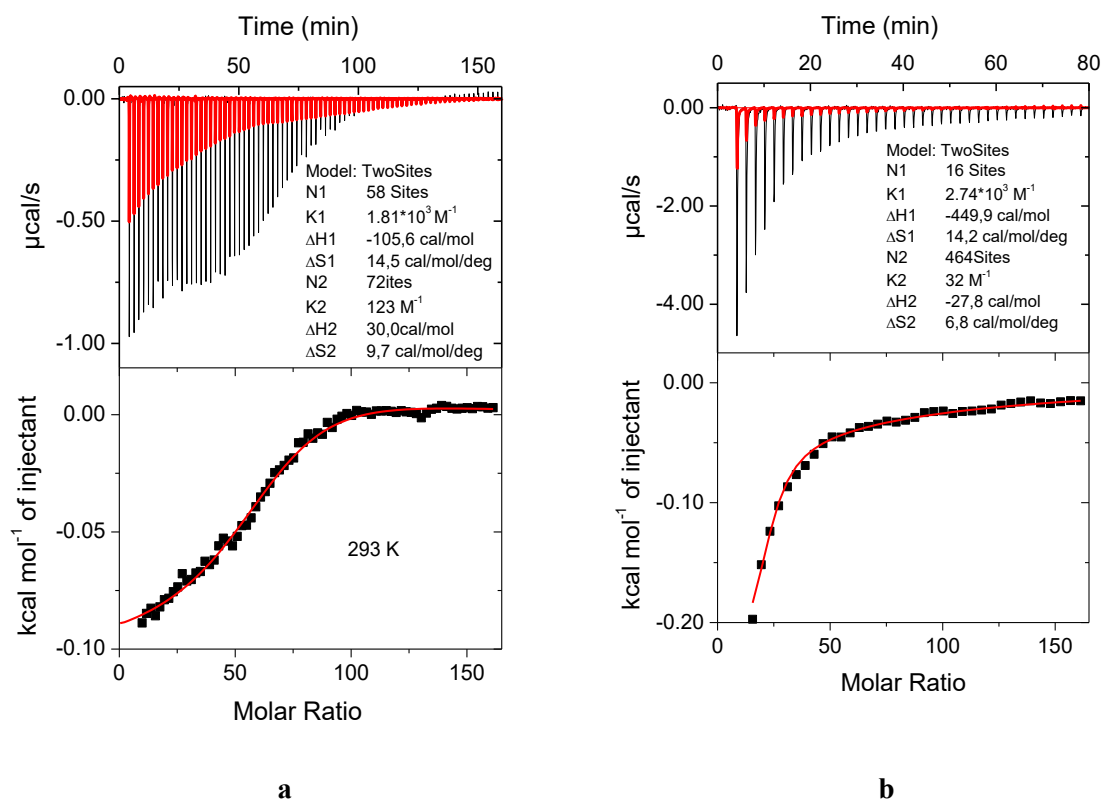

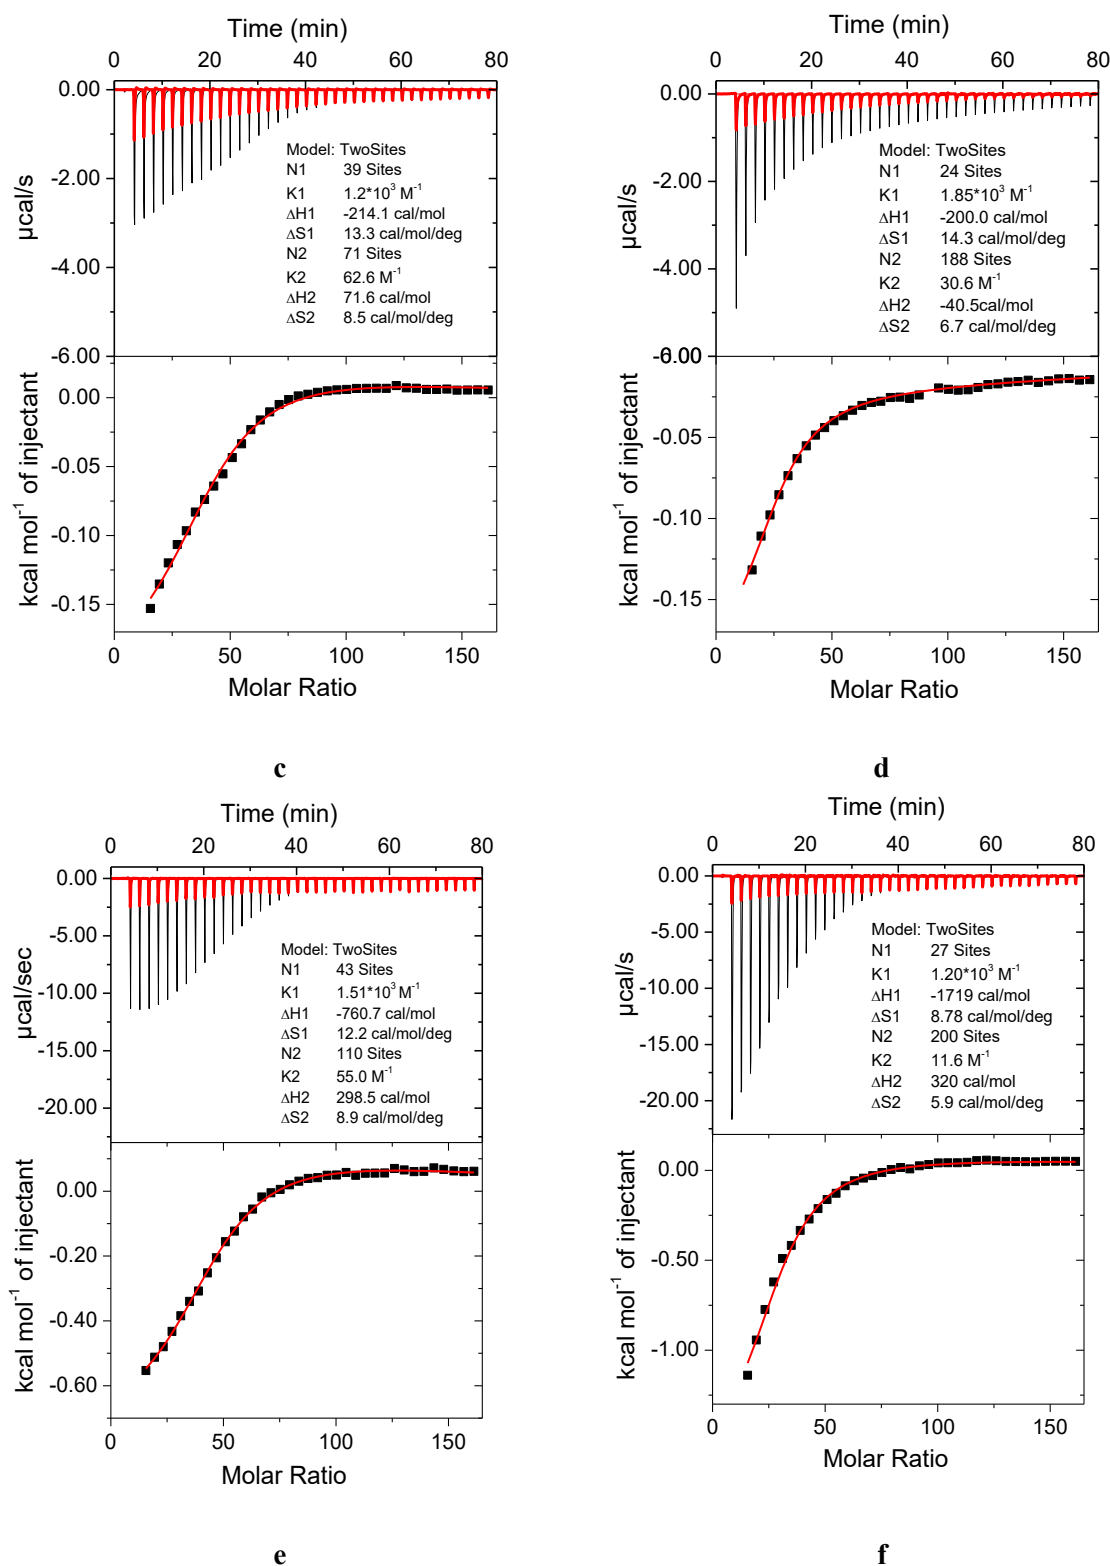

**Figure S37.** Titration of the **F3 (pDFFA)** solution in ultrapure water with PBS (a,c,e) and FBS (b,d,f) respectively; 293 K (a,b), 301 K (c,d) and 323 K (e,f). Upper graph – heat flux as a function of time; red line – titration of PBS or FBS, respectively, into ultrapure water; black line – titration into polymer solution. Lower graph – integrated heat per 1 mol of titrant (scatter); fit to a two-site model (line).

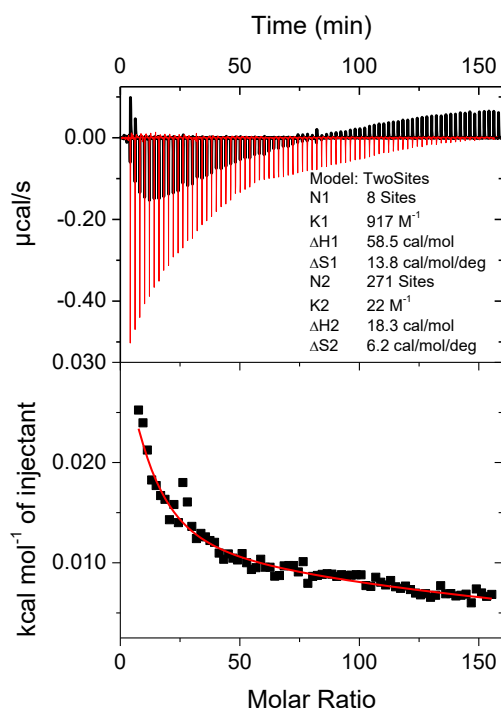**a**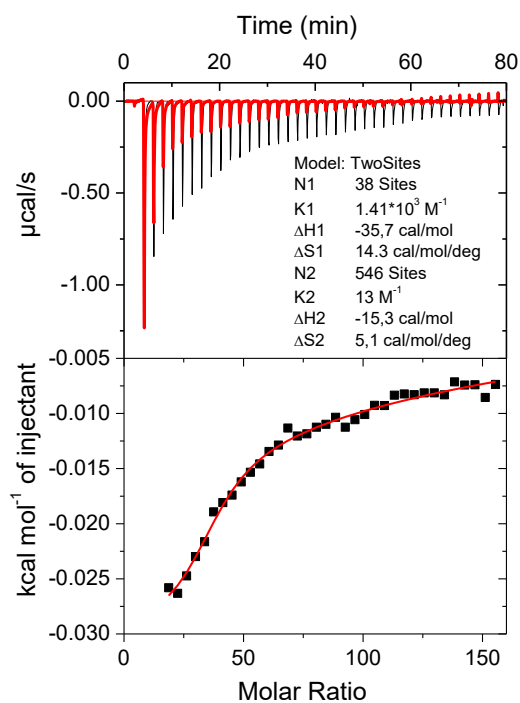**b**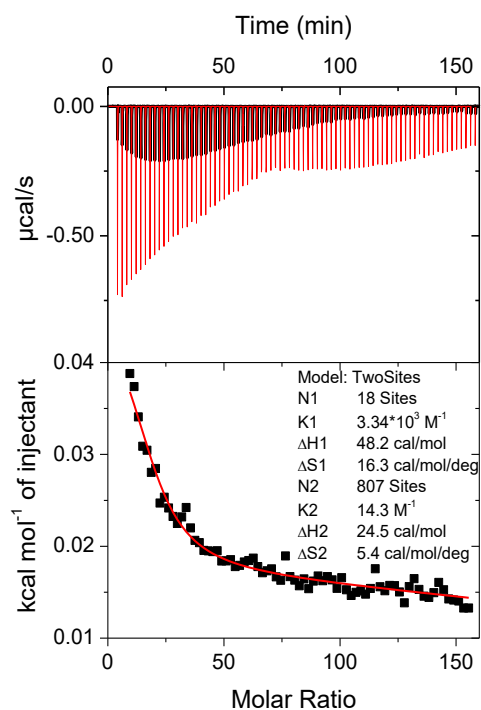**c**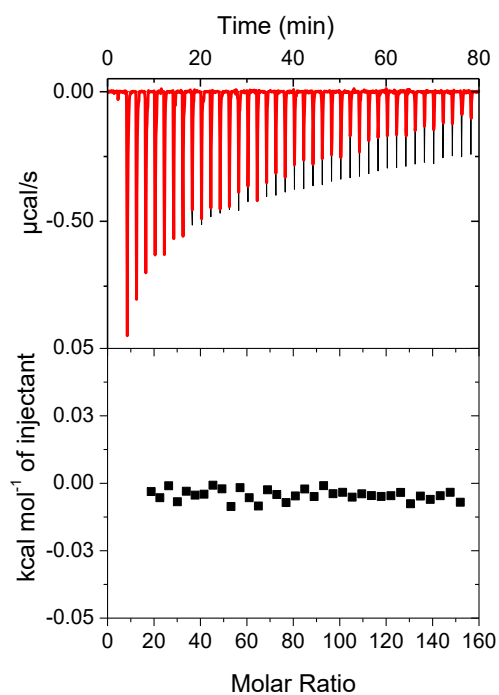**d**

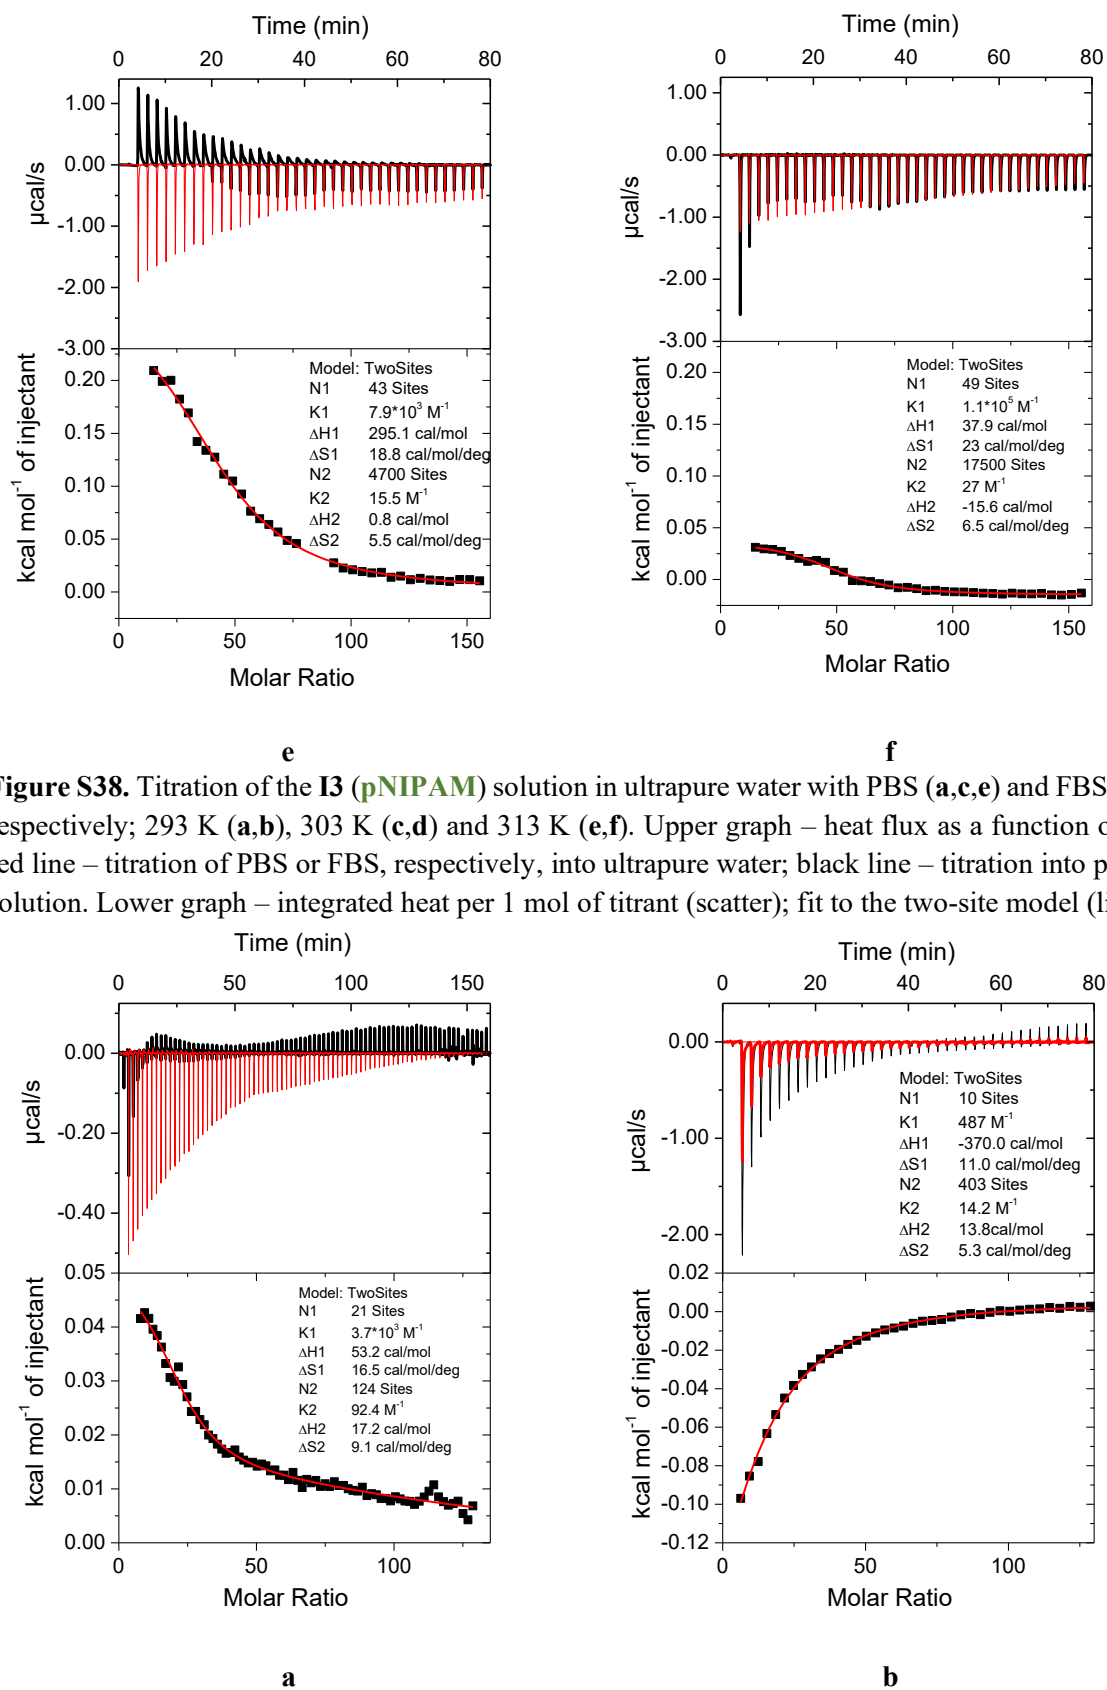

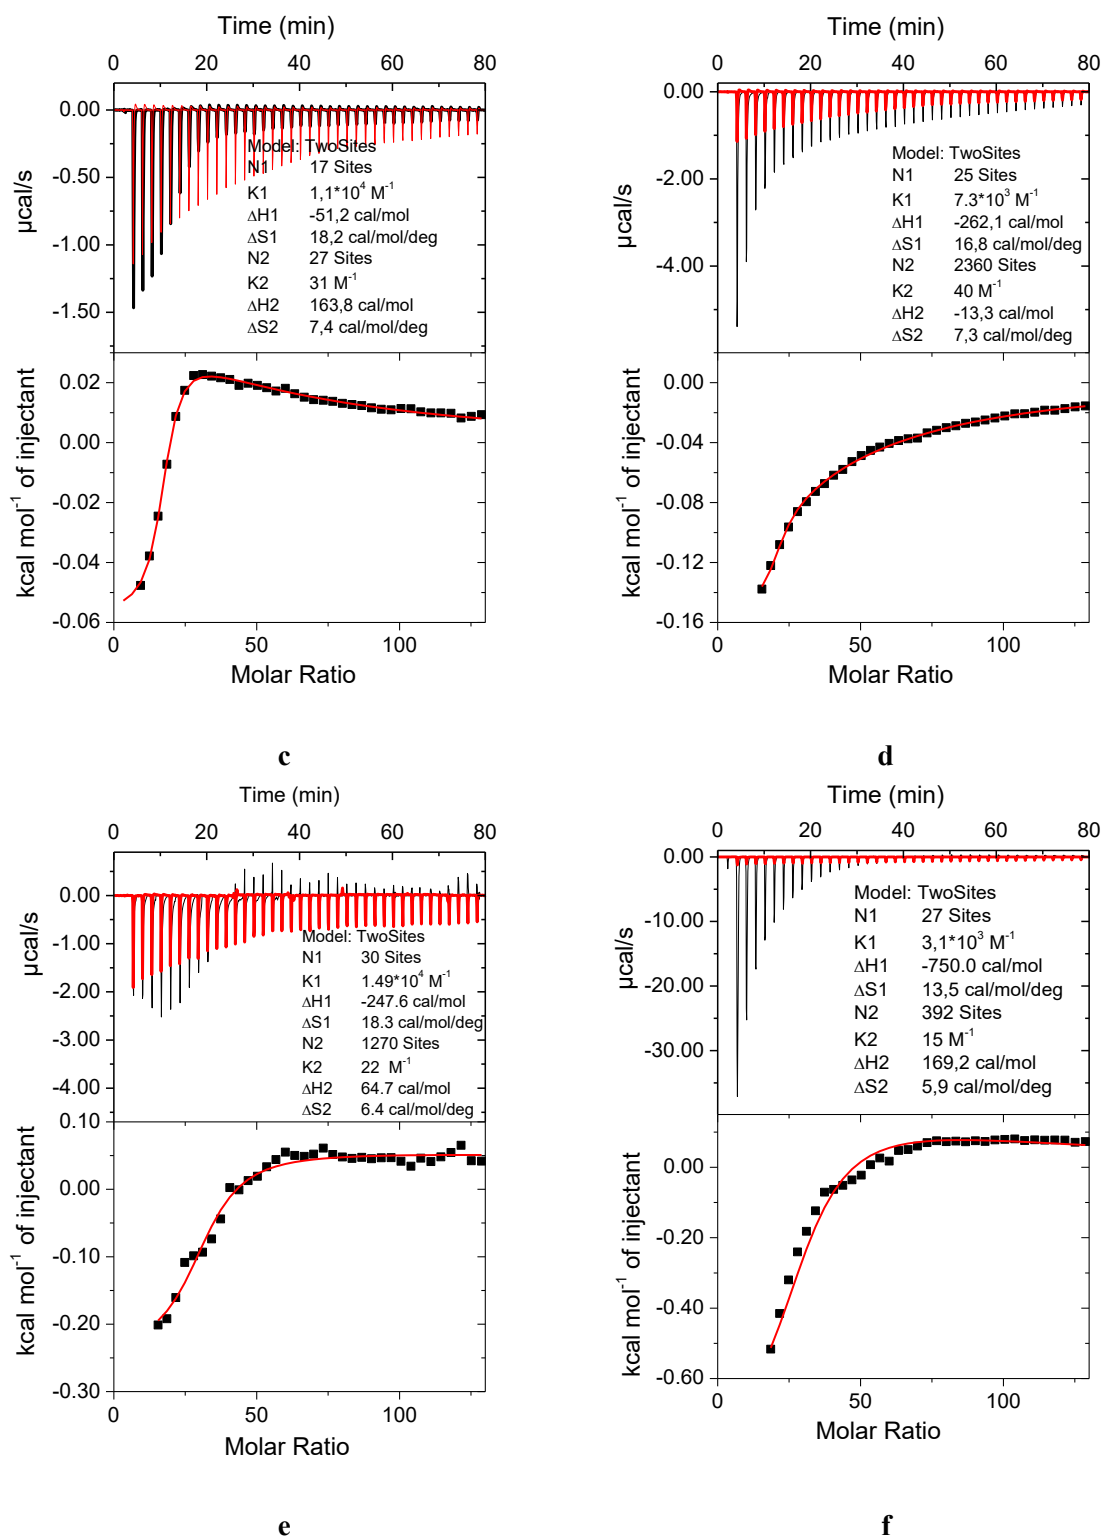

**Figure S39.** Titration of the **E3 (pDEA)** solution in ultrapure water with PBS (**a,c,e**) and FBS (**b,d,f**) respectively; 293 K (**a,b**), 301 K (**c,d**) and 313 K (**e,f**). Upper graph – heat flux as a function of time; red line – titration of PBS or FBS, respectively, into ultrapure water; black line – titration into polymer solution. Lower graph – integrated heat per 1 mol of titrant (scatter); fit to the two independent binding sites model (line).



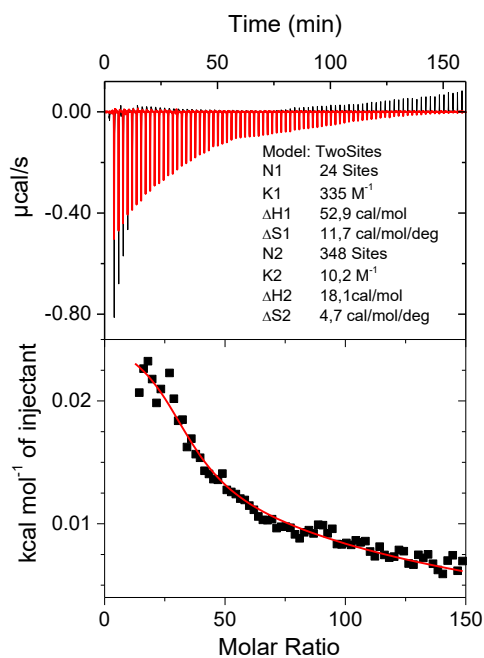**a**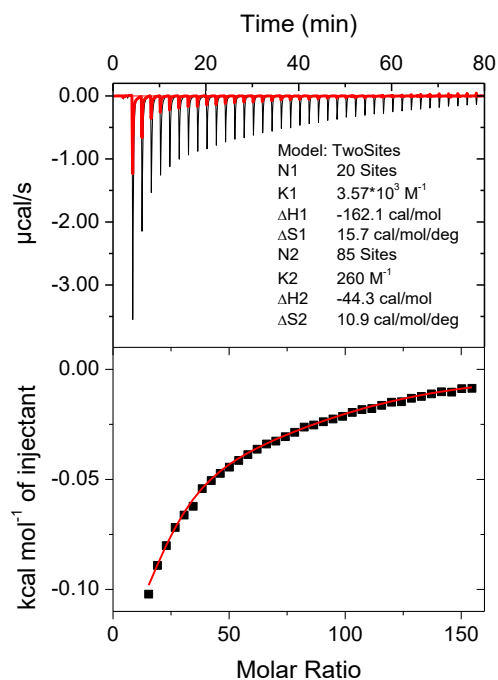**b**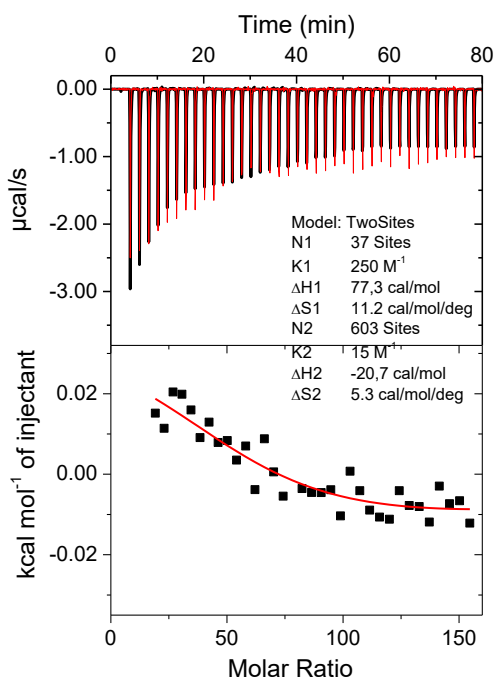**c**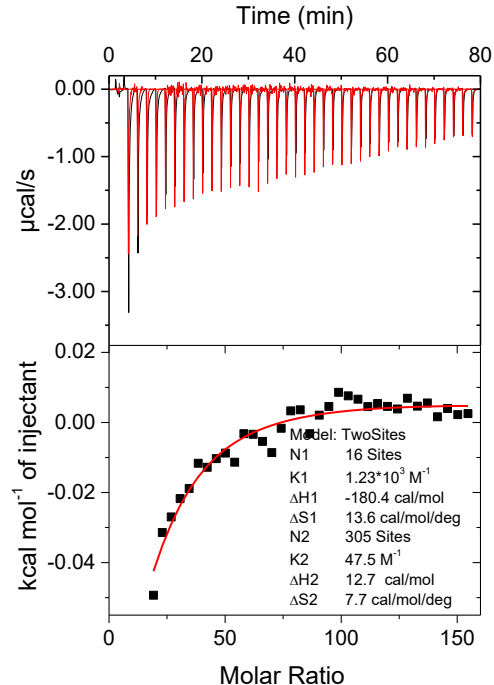**d**

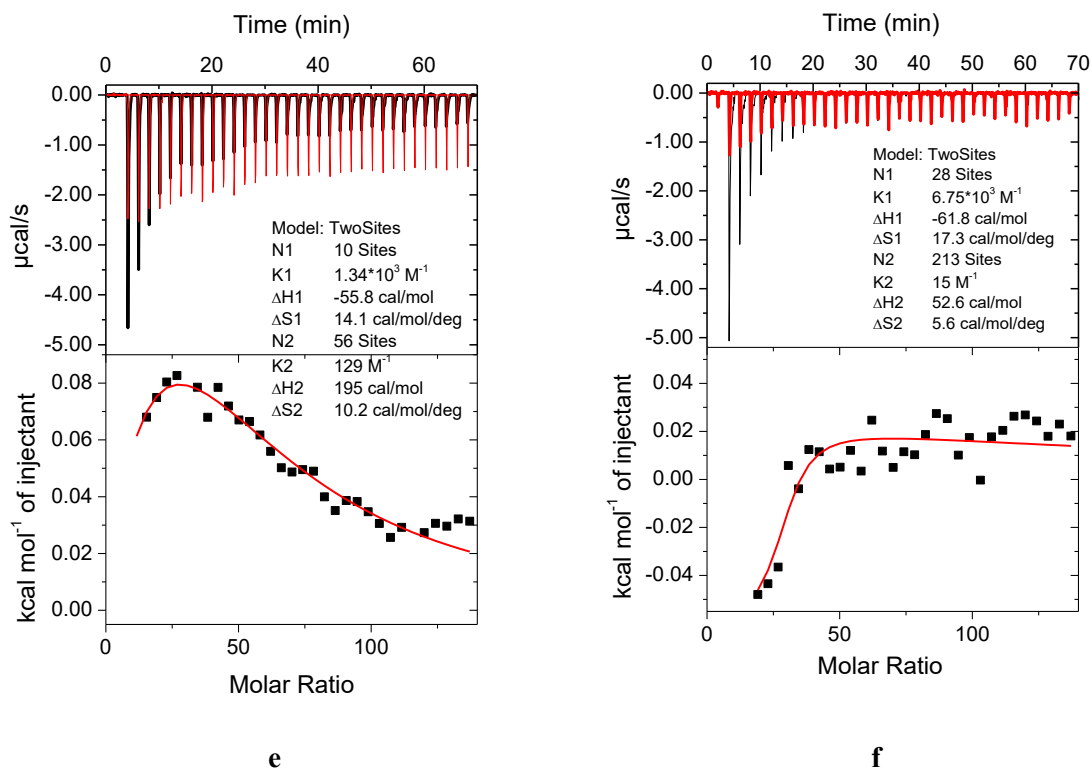

**Figure S40.** Titration of the **P3** (pAP) solution in ultrapure water with PBS (a,c,e) and FBS (b,d,f) respectively; 293 K (a,b), 323 K (c,d) and 333 K (e,f). Upper graph – heat flux as a function of time; red line – titration of PBS or FBS, respectively into ultrapure water; black line – titration into polymer solution. Lower graph – integrated heat per 1 mol of titrant (scatter); fit to the two independent binding sites model (line).

The titration isotherms of complex shape consist of heat effects originating from (i) “pseudo-binding” event and (ii) non-linear heat of mixing. Therefore, we fitted the cumulated reaction heat as a function of titrant-to-analyte molar ratio to **two** independent binding sites model (one Wiseman isotherm<sup>S13</sup> for each effect, both **i** and **ii**). Because the concentration of the titrant (PBS or FBS) is unknown (as these mixtures contain many compounds in various concentrations), we chose an arbitrary value 162.7 mM (ionic strength of PBS) for **both** PBS and FBS. Reaction enthalpy, as an independent fitting parameter, was then normalized to the analyte concentration (polymer). The remaining fitting parameters (stoichiometry  $n$ , binding constant  $K_a$ ) are affected by the titrant-to-analyte molar ratio and, therefore, not included in the results.

The fitting parameters for the second binding site (**ii**) were:

- a)  $K_{a1} \gg K_{a2}$
- b)  $\Delta H_1 > \Delta H_2$

## S7.2. ITC – enthalpies of F3, I3, E3, and P3

**Table S7.** Concentrations and pH of polymer solutions; enthalpy  $\Delta H$  (J/mol of monomer) of mixing of polymer solutions with PBS and FBS at various temperatures

| Sample                       | F3 (pD <sup>+</sup> FEA) |        |        |       |       |        | I3 (pNIPAM) |      |       |       |       |      | E3 (pDEA) |       |        |       |       |        | P3 (pAP) |      |      |       |       |       |
|------------------------------|--------------------------|--------|--------|-------|-------|--------|-------------|------|-------|-------|-------|------|-----------|-------|--------|-------|-------|--------|----------|------|------|-------|-------|-------|
| Conc. (mM)*                  | 0.213                    |        |        |       |       |        | 0.221       |      |       |       |       |      | 0.267     |       |        |       |       |        | 0.216    |      |      |       |       |       |
| pH in H <sub>2</sub> O**     | ≈ 4.9                    |        |        |       |       |        | ≈ 4.6       |      |       |       |       |      | ≈ 4.0     |       |        |       |       |        | ≈ 5.5    |      |      |       |       |       |
| Titrant                      | PBS                      |        |        | FBS   |       |        | PBS         |      |       | FBS   |       |      | PBS       |       |        | FBS   |       |        | PBS      |      |      | FBS   |       |       |
| T, K                         | 293                      | 301    | 323    | 293   | 301   | 323    | 293         | 303  | 313   | 293   | 303   | 313  | 293       | 301   | 313    | 293   | 301   | 313    | 293      | 323  | 333  | 293   | 323   | 333   |
| $\Delta H$ , (J/mol)         | -73.9                    | -100.7 | -394.4 | -86.7 | -57.9 | -559.6 | 4.9         | 9.1  | 113.1 | -14.2 | ≈ 0.0 | 19.5 | 15.8      | -12.3 | -105.4 | -52.5 | -92.9 | -287.2 | 14.4     | 32.3 | -6.3 | -36.7 | -32.6 | -19.6 |
| transition conc. (mM)***     | 17.4                     | 13.4   | 17.5   | 9.3   | 8.8   | 16.3   | 11.0        | 11.0 | 19.0  | 21.1  | N/A   | 21.2 | 9.7       | 7.0   | 14.6   | 8.9   | 11.6  | 17.3   | 12.3     | 16.3 | 20.0 | 12.0  | 14.6  | 8.1   |
| transition conc. (mg/mL)**** | 1.0                      | 0.8    | 1.0    | 3.0   | 2.9   | 5.3    | 0.6         | 0.6  | 1.1   | 6.9   | N/A   | 6.9  | 0.5       | 0.4   | 0.8    | 2.9   | 3.8   | 5.6    | 0.7      | 0.9  | 1.1  | 3.9   | 4.8   | 2.6   |

\* polymer concentration in the analyte solution

\*\* pH of aqueous solution of polymer, 10 mg/mL

\*\*\* concentration of titrant (PBS or FBS) in units of ionic strength of PBS solution, determined from the coordinate on the *x*-axis (molar ratio) on

Figures S37 to 40.

\*\*\*\* concentration of titrant in mg/mL

**S7.3. ITC - titration of benzoic acid**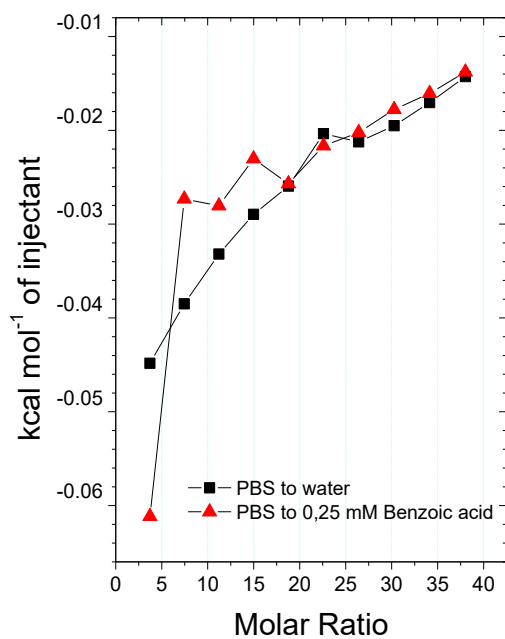**a**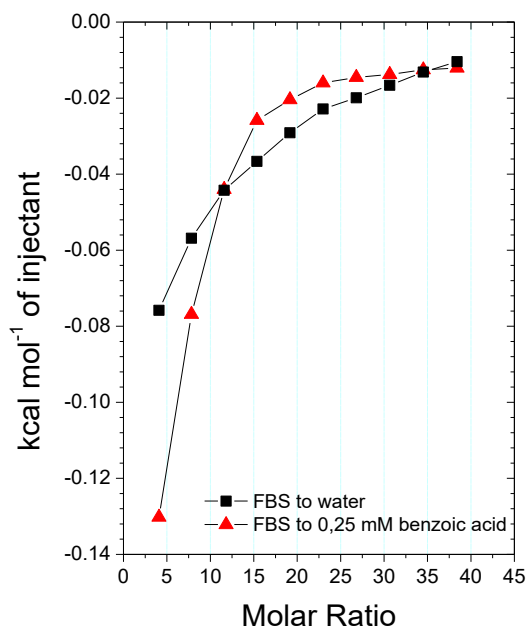**b**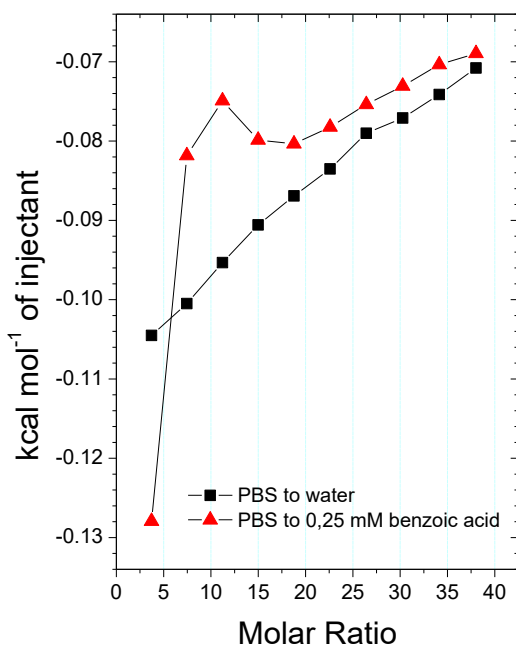**c**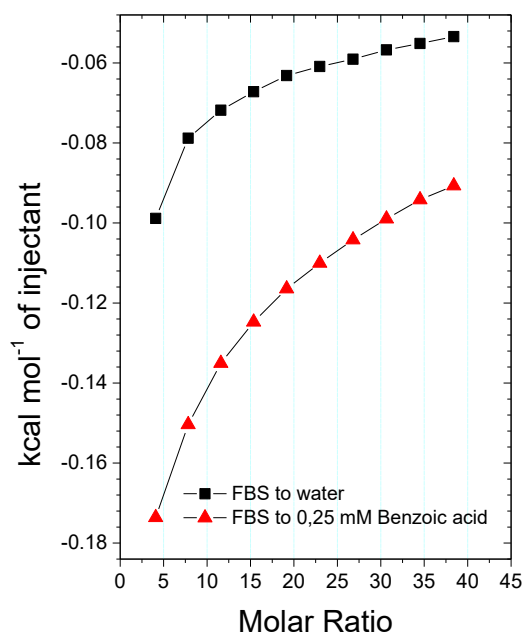**d**

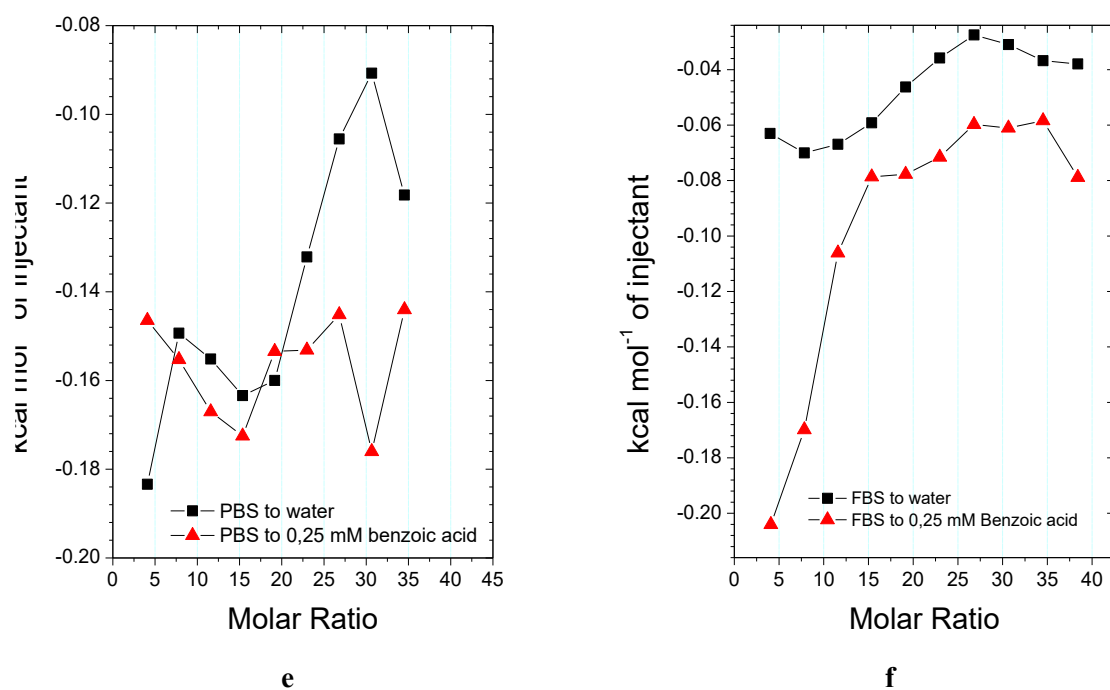

**Figure S41.** ITC isotherms of the titration of the solution of benzoic acid (0.25 mM) with PBS (a, c, e) and FBS (b, d, f) at 293 K (a, b), 313 K(c, d) and 333 K (e, f).

## S7.3. ITC – titration of polymers F1 and F2

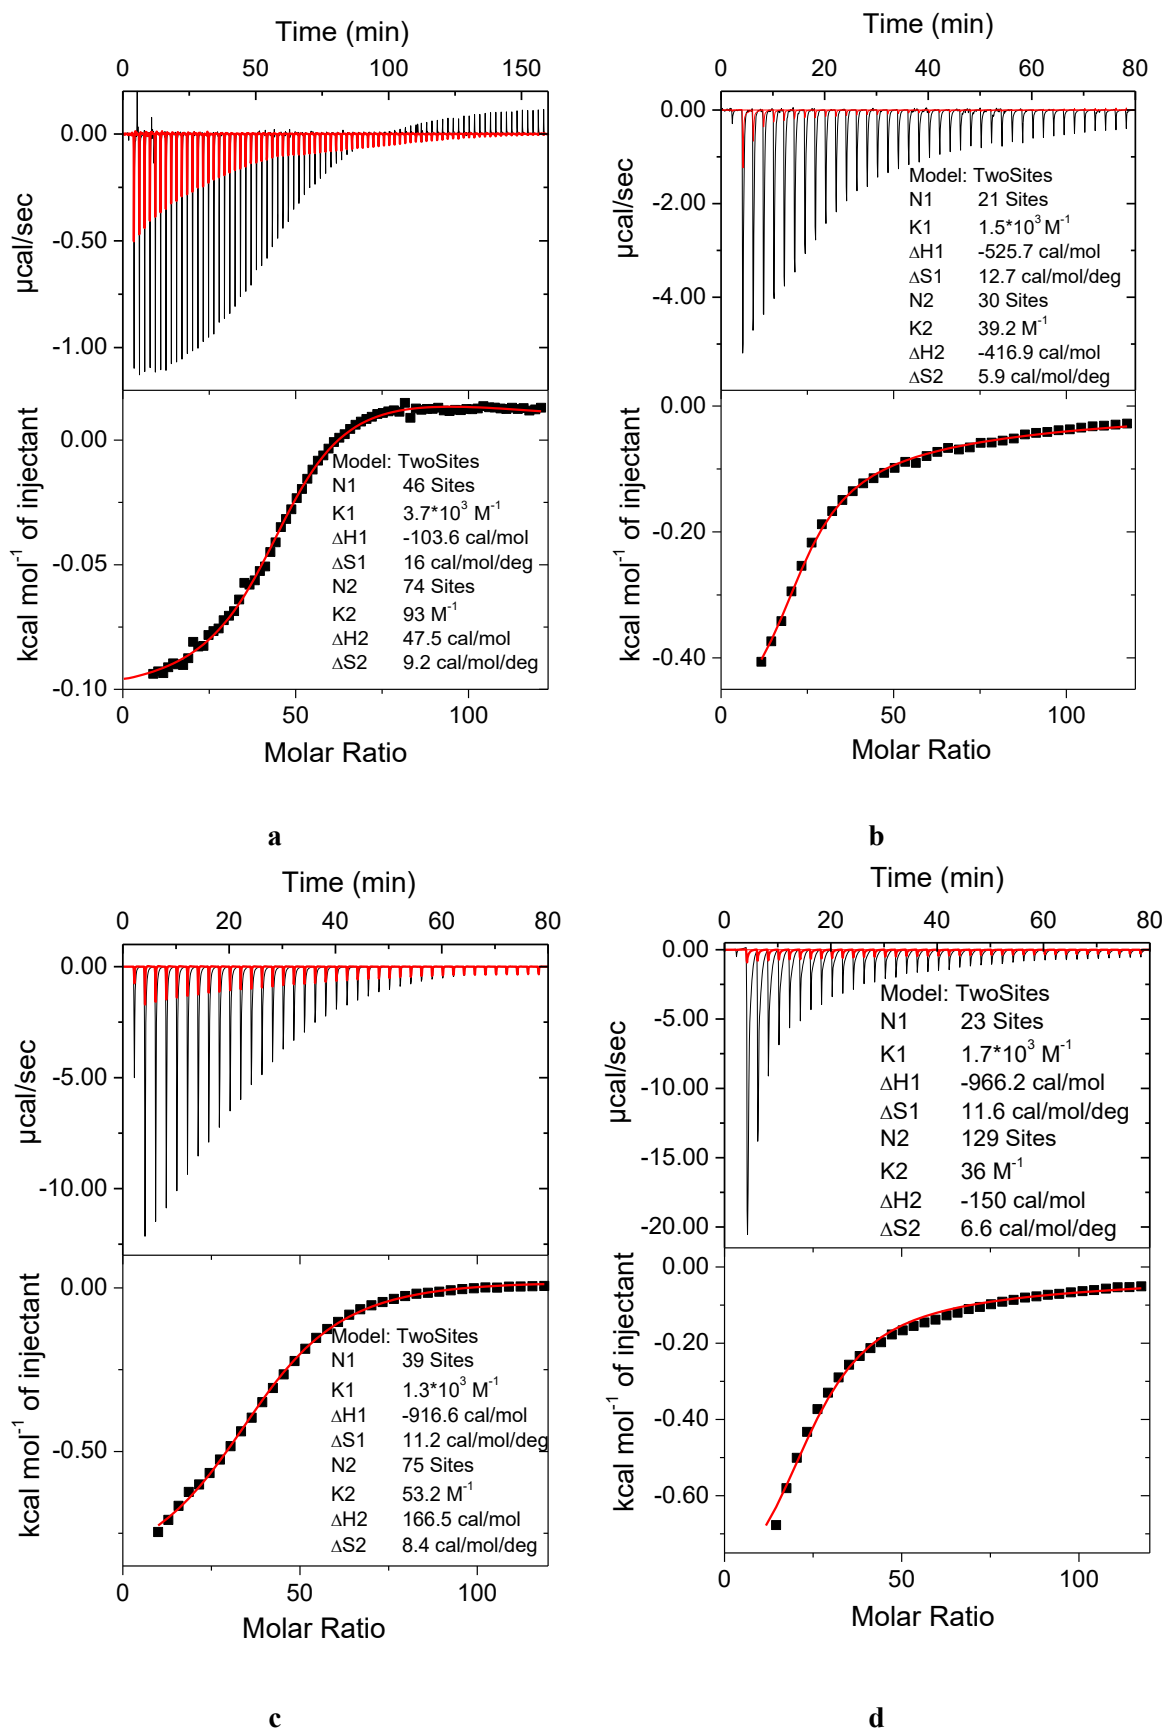

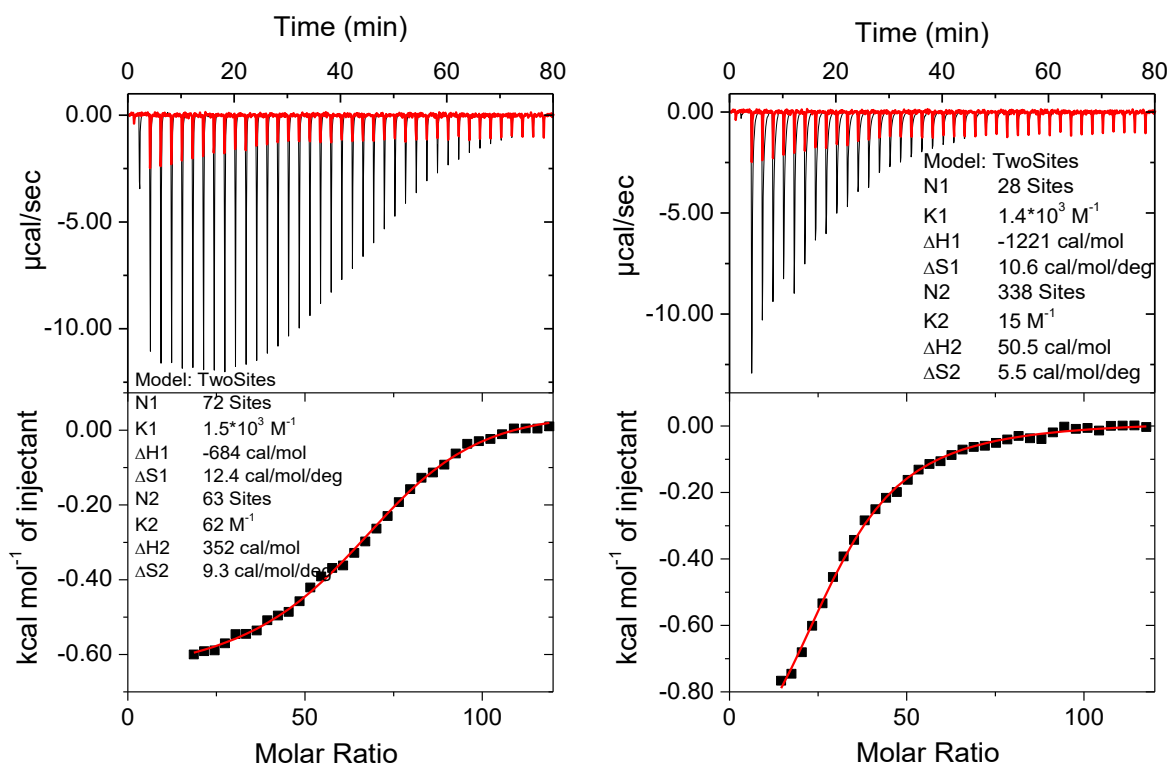

**Figure S42.** Titration of the F2 (pDFEA) solution in ultrapure water with PBS (a,c,e) and FBS (b,d,f) respectively; 293 K (a,b), 305 K (c,d) and 323 K (e,f). Upper graph – heat flux as a function of time; red line – titration of PBS or FBS, respectively into ultrapure water; black line – titration into polymer solution. Lower graph – integrated heat per 1 mol of titrant (scatter); fit to the two independent binding sites model (line).



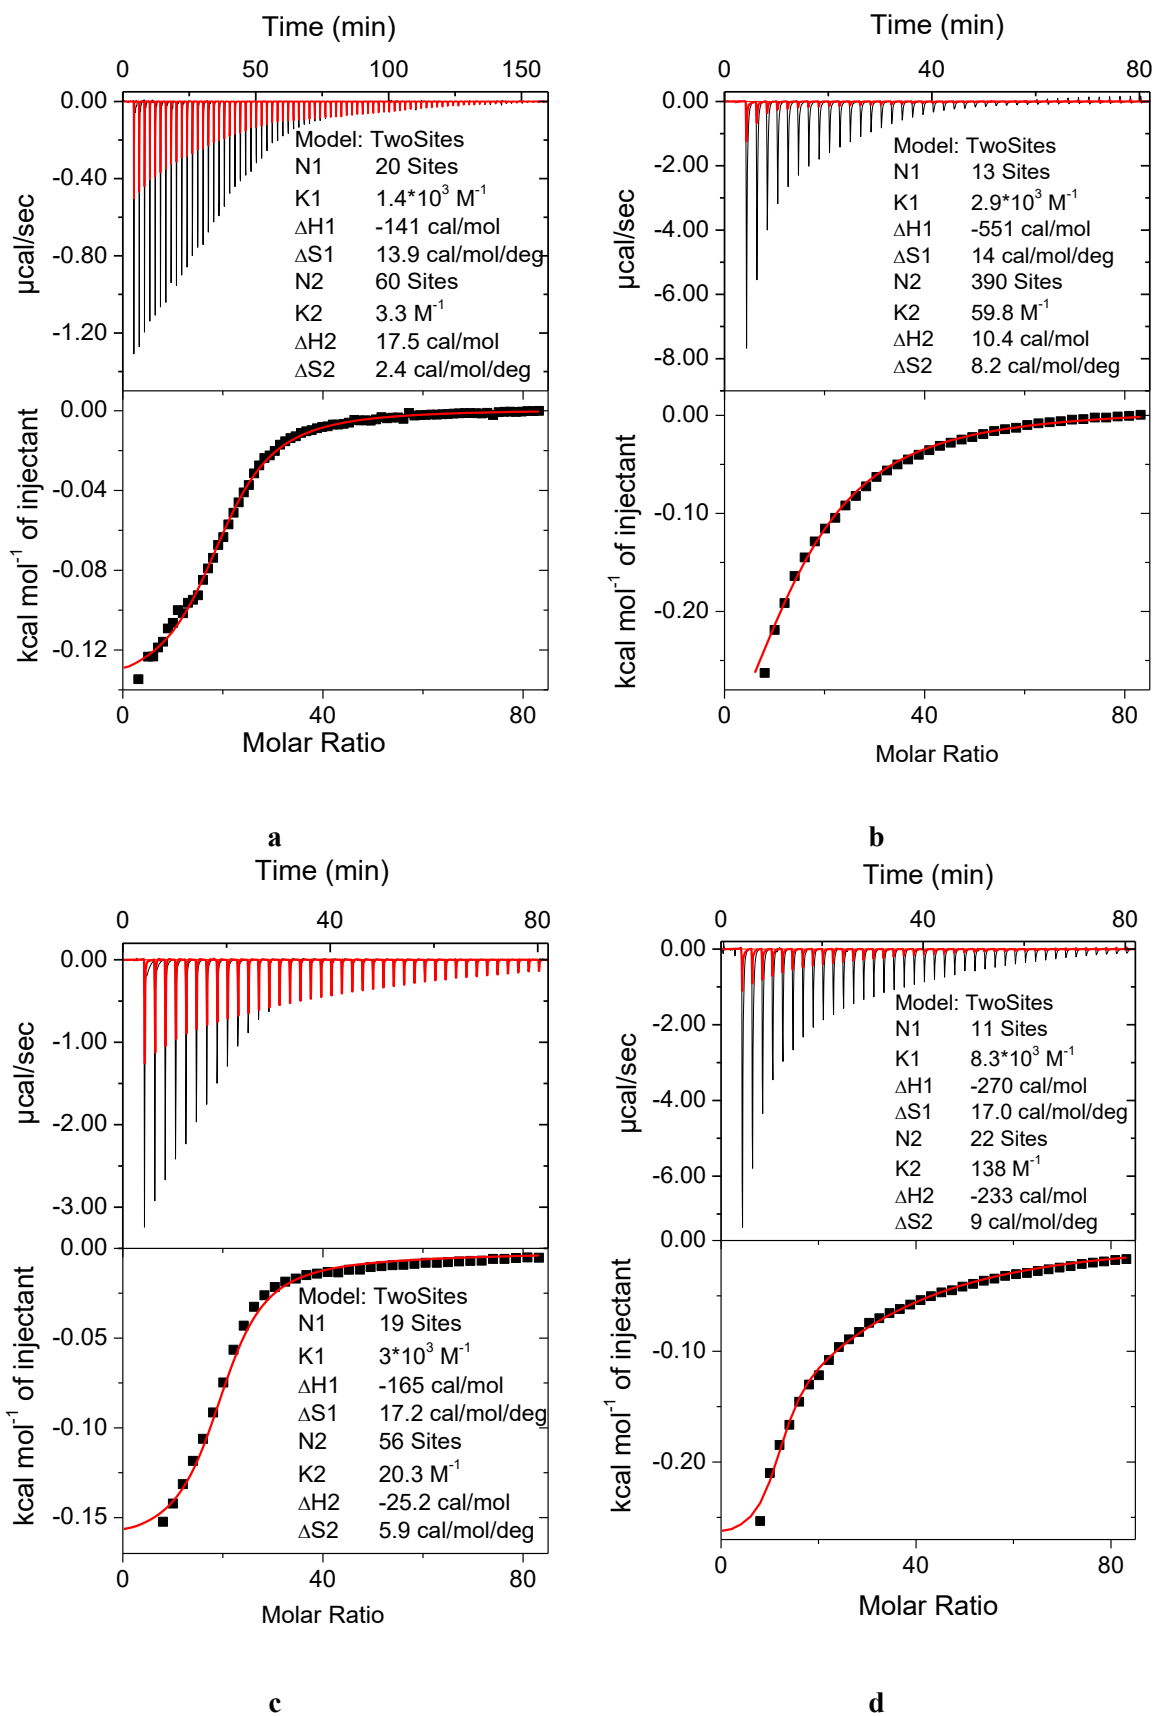

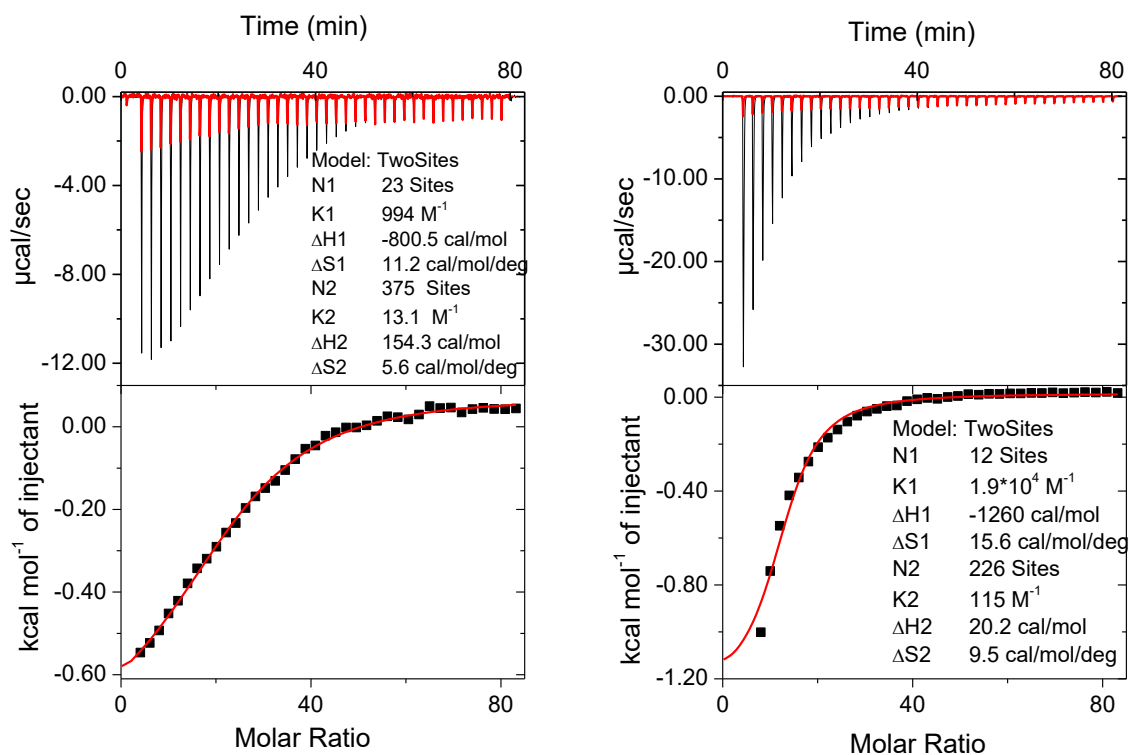

**Figure S43.** Titration of the F1 (pDFAA) solution in ultrapure water with PBS (a,c,e) and FBS (b,d,f) respectively; 293 K (a,b), 298 K (c,d) and 323 K (e,f). Upper graph – heat flux as a function of time; red line – titration of PBS or FBS, respectively into ultrapure water; black line – titration into polymer solution. Lower graph – integrated heat per 1 mol of titrant (scatter); fit to the two independent binding sites model (line).

## S7.4. ITC – enthalpies of F1, F2, and F3

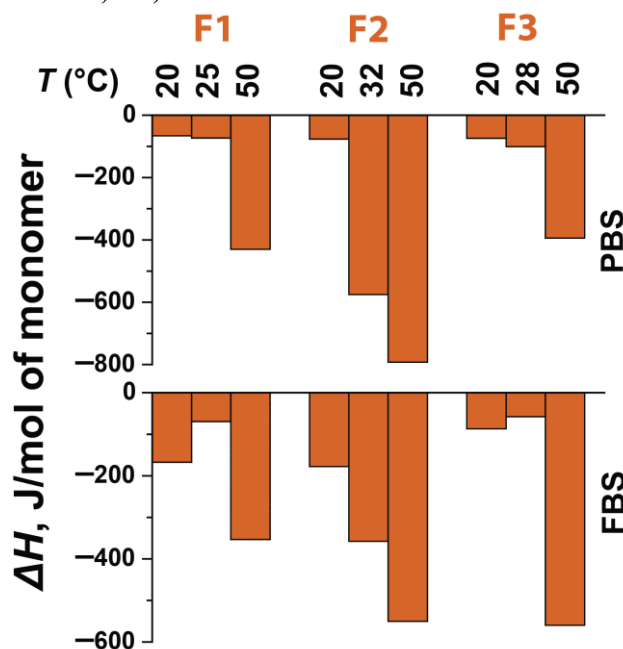

**Figure S44.** Enthalpy of titration of 10 mg/mL **F1**, **F2** and **F3** solutions with PBS and FBS, normalised to 1 mol of monomer units at three different temperatures with PBS (top) and FBS (bottom). The values of enthalpies are shown in **Table S8**.

We assessed the effect of the polymer molar weight on the enthalpy of aggregation of **pDFEA**. Under all conditions, the **pDFEA** aggregation was exothermic, possibly caused by strong interactions (due to hydrogen bonding of  $\text{CF}_2\text{H}$  moieties<sup>S14</sup>). The interaction of **pDFEA** and PBS or FBS was more exothermic at high (50 °C) than at low (20 °C) temperatures, most likely due to the salting-out effect and subsequent aggregation. Furthermore, adding FBS to the solution of the non-aggregated polymer was always more exothermic than adding only PBS, thus indicating the formation of **pDFEA**-protein complexes. Adding FBS to aggregated polymer was in some cases (**F1**, **F2**) less and in others more (**F3**) exothermic than adding only PBS. The differences in enthalpy of aggregation between **F1**, **F2**, and **F3** in PBS can be ascribed to different the architecture of the particles (as discussed in the Manuscript).

While the reaction enthalpy in both PBS and FBS can be ascribed to changes in polymer solvation, polymer interactions with ions and aggregation, the reaction enthalpy in FBS can be also ascribed to protein-polymer interactions.

**Table S8.** Concentrations and pH of polymer solutions; enthalpy  $\Delta H$  (J/mol of monomer) of mixing of polymer solutions with PBS and FBS at various temperatures

| Sample                       | F1 (pD <sub>FEA</sub> ) |       |        |        |       |        | F2 (pD <sub>FEA</sub> ) |        |        |        |        |        | F3 (pD <sub>FEA</sub> ) |       |       |       |       |       |
|------------------------------|-------------------------|-------|--------|--------|-------|--------|-------------------------|--------|--------|--------|--------|--------|-------------------------|-------|-------|-------|-------|-------|
| Conc. (mM)*                  | 0.413                   |       |        |        |       |        | 0.284                   |        |        |        |        |        | 0.213                   |       |       |       |       |       |
| pH in H <sub>2</sub> O**     | ≈ 4.9                   |       |        |        |       |        | ≈ 4.8                   |        |        |        |        |        | ≈ 4.9                   |       |       |       |       |       |
| Titrant                      | PBS                     |       |        | FBS    |       |        | PBS                     |        |        | FBS    |        |        | PBS                     |       |       | FBS   |       |       |
| T, K                         | 293                     | 298   | 323    | 293    | 298   | 323    | 293                     | 305    | 313    | 293    | 305    | 313    | 293                     | 301   | 293   | 301   | 293   | 301   |
| $\Delta H$ , (J/mol)         | -65.9                   | -73.3 | -430.4 | -167.4 | -69.4 | -353.4 | -76.7                   | -575.3 | -792.5 | -177.7 | -357.6 | -550.2 | -1.23                   | -2.59 | -1.23 | -2.59 | -1.23 | -2.59 |
| transition conc. (mM)***     | 12.0                    | 10.1  | 18.1   | 11.6   | 10.9  | 8.7    | 17.8                    | 17.03  | 24.6   | 10.9   | 10.9   | 13.1   | 17.4                    | 13.4  | 17.4  | 13.4  | 17.4  | 13.4  |
| transition conc. (mg/mL)**** | 0.7                     | 0.6   | 1.0    | 3.8    | 3.6   | 2.8    | 1.0                     | 0.9    | 1.4    | 3.6    | 3.6    | 4.3    | 1.0                     | 0.8   | 1.0   | 0.8   | 1.0   | 0.8   |

\* polymer concentration in the analyte solution

\*\* pH of aqueous solution of polymer, 10 mg/mL

\*\*\* concentration of titrant (PBS or FBS) in units of ionic strength of PBS solution, determined from the coordinate on the *x*-axis (molar ratio) on**Figures S41 to 43.**

\*\*\*\* concentration of titrant in mg/mL

## S8. Dynamic light scattering data

At a low temperature, almost all study polymers showed a population of unimers (approximately 5 nm), which formed larger aggregates with the increase in temperature. In some samples, we detected a small number of large assemblies (in the order of hundreds of nanometres), even below the  $T_{\text{CPS}}$ , which had remained undetected by turbidimetry. These ‘pre-aggregation’ molecular assemblies confirmed our previous observations.<sup>S15–S17</sup> However, large particles scatter light in DLS at a higher intensity than small particles (the scattering intensity is proportional to  $R_{\text{h}}^3$ ),<sup>S18</sup> so the concentration of large particles is substantially lower than our DLS data suggest.

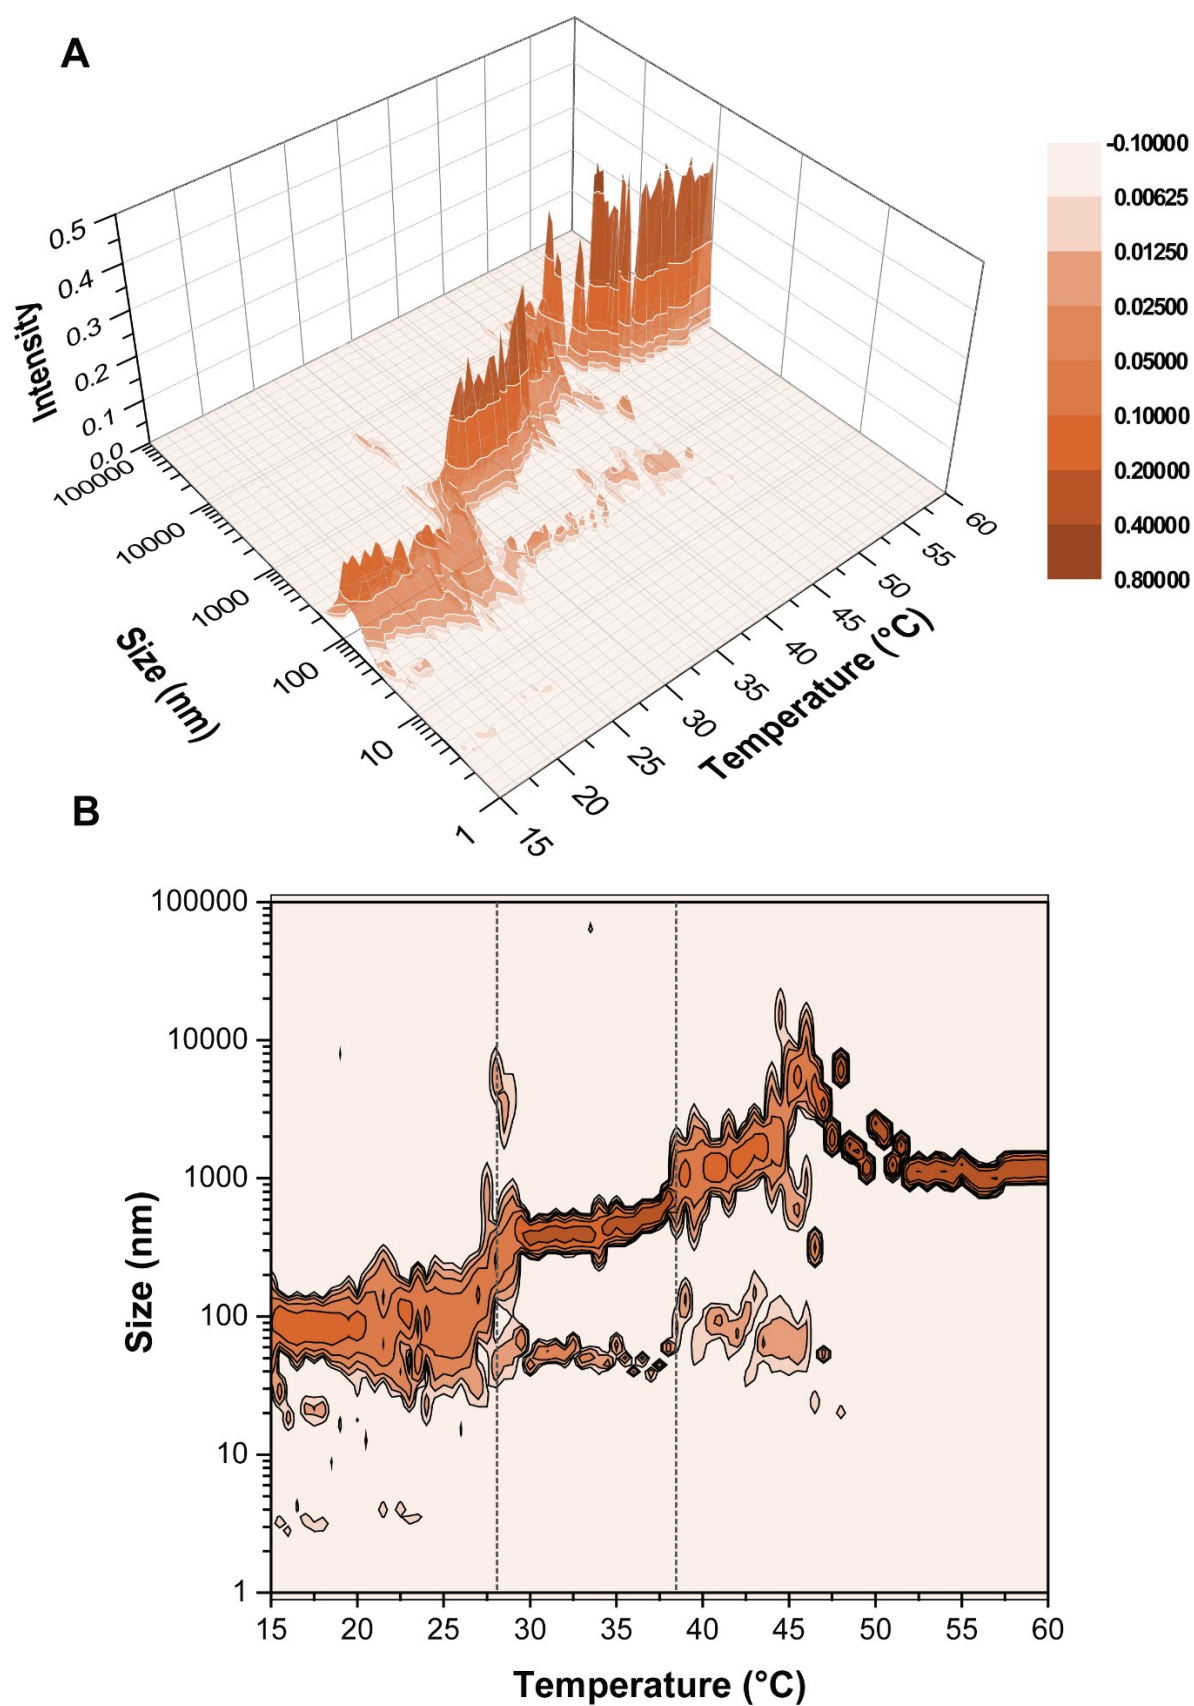

**Figure S45.** Size distributions of molecular assemblies of polymer F1 (10 mg/mL in PBS) as a function of temperature; depicted as 3D plot (A) and contour graph (B).  $T_{CP1}$  (dashed lines) was assigned to 28 °C,  $T_{CP2}$  was assigned to 38 °C.

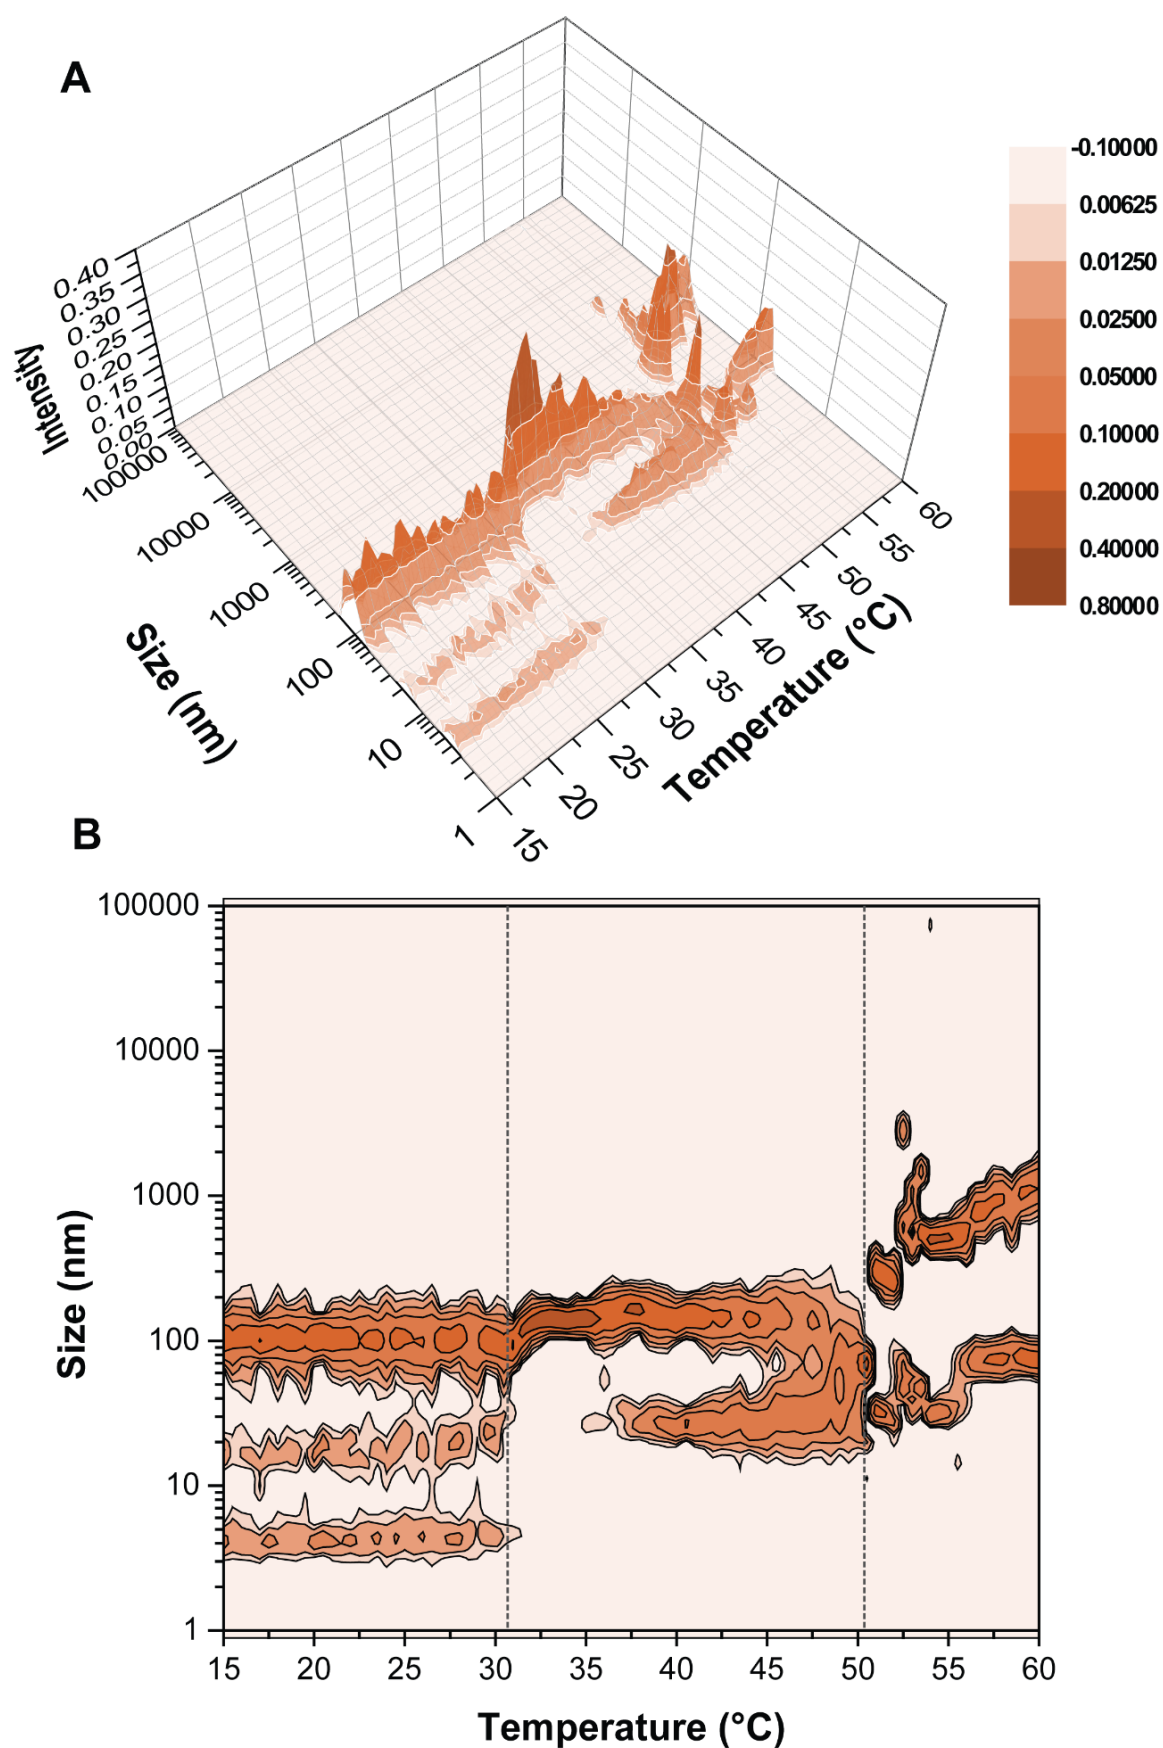

**Figure S46.** Size distributions of molecular assemblies of polymer **F2** (10 mg/mL in PBS) as a function of temperature; depicted as 3D plot (**A**) and contour graph (**B**).  $T_{CP1}$  (dashed lines) was assigned to 31 °C,  $T_{CP2}$  was assigned to 50 °C.



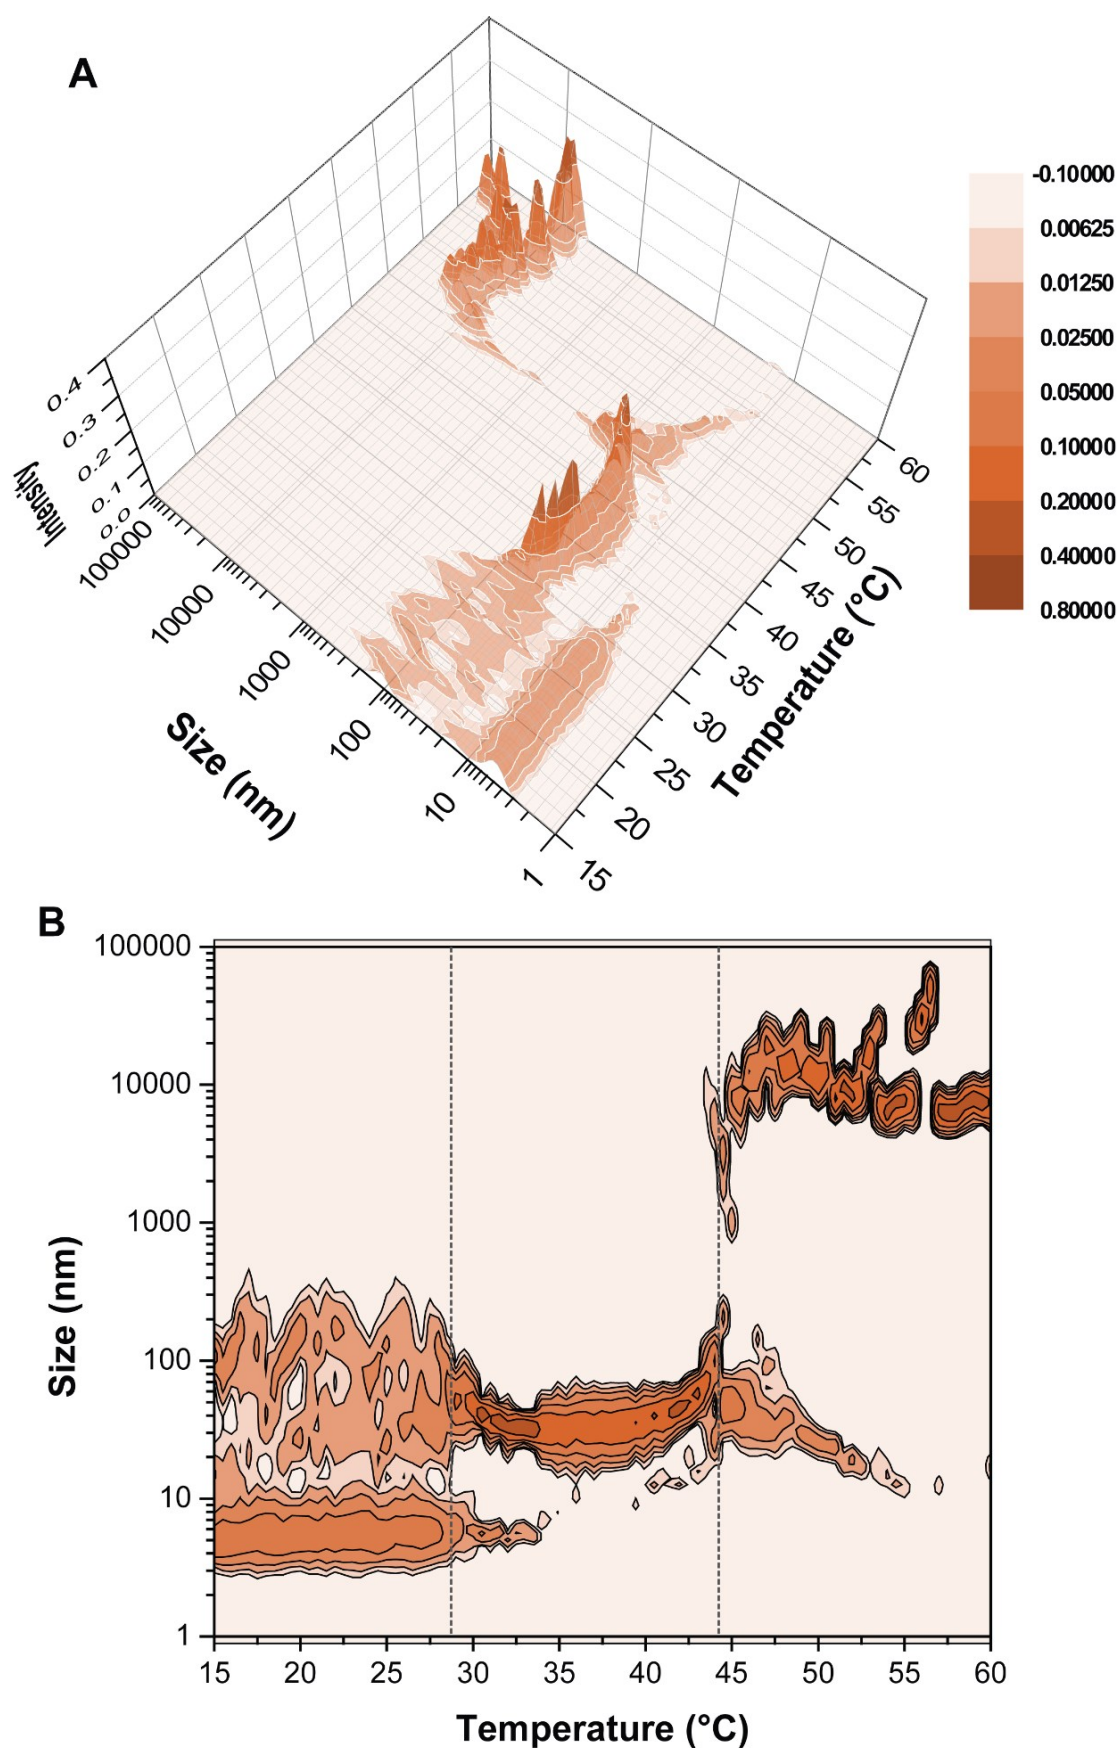

**Figure S47.** Size distributions of molecular assemblies of polymer F3 (10 mg/mL in PBS) as a function of temperature; depicted as 3D plot (A) and contour graph (B).  $T_{CP1}$  (dashed lines) was assigned to 28 °C,  $T_{CP2}$  was assigned to 44 °C.



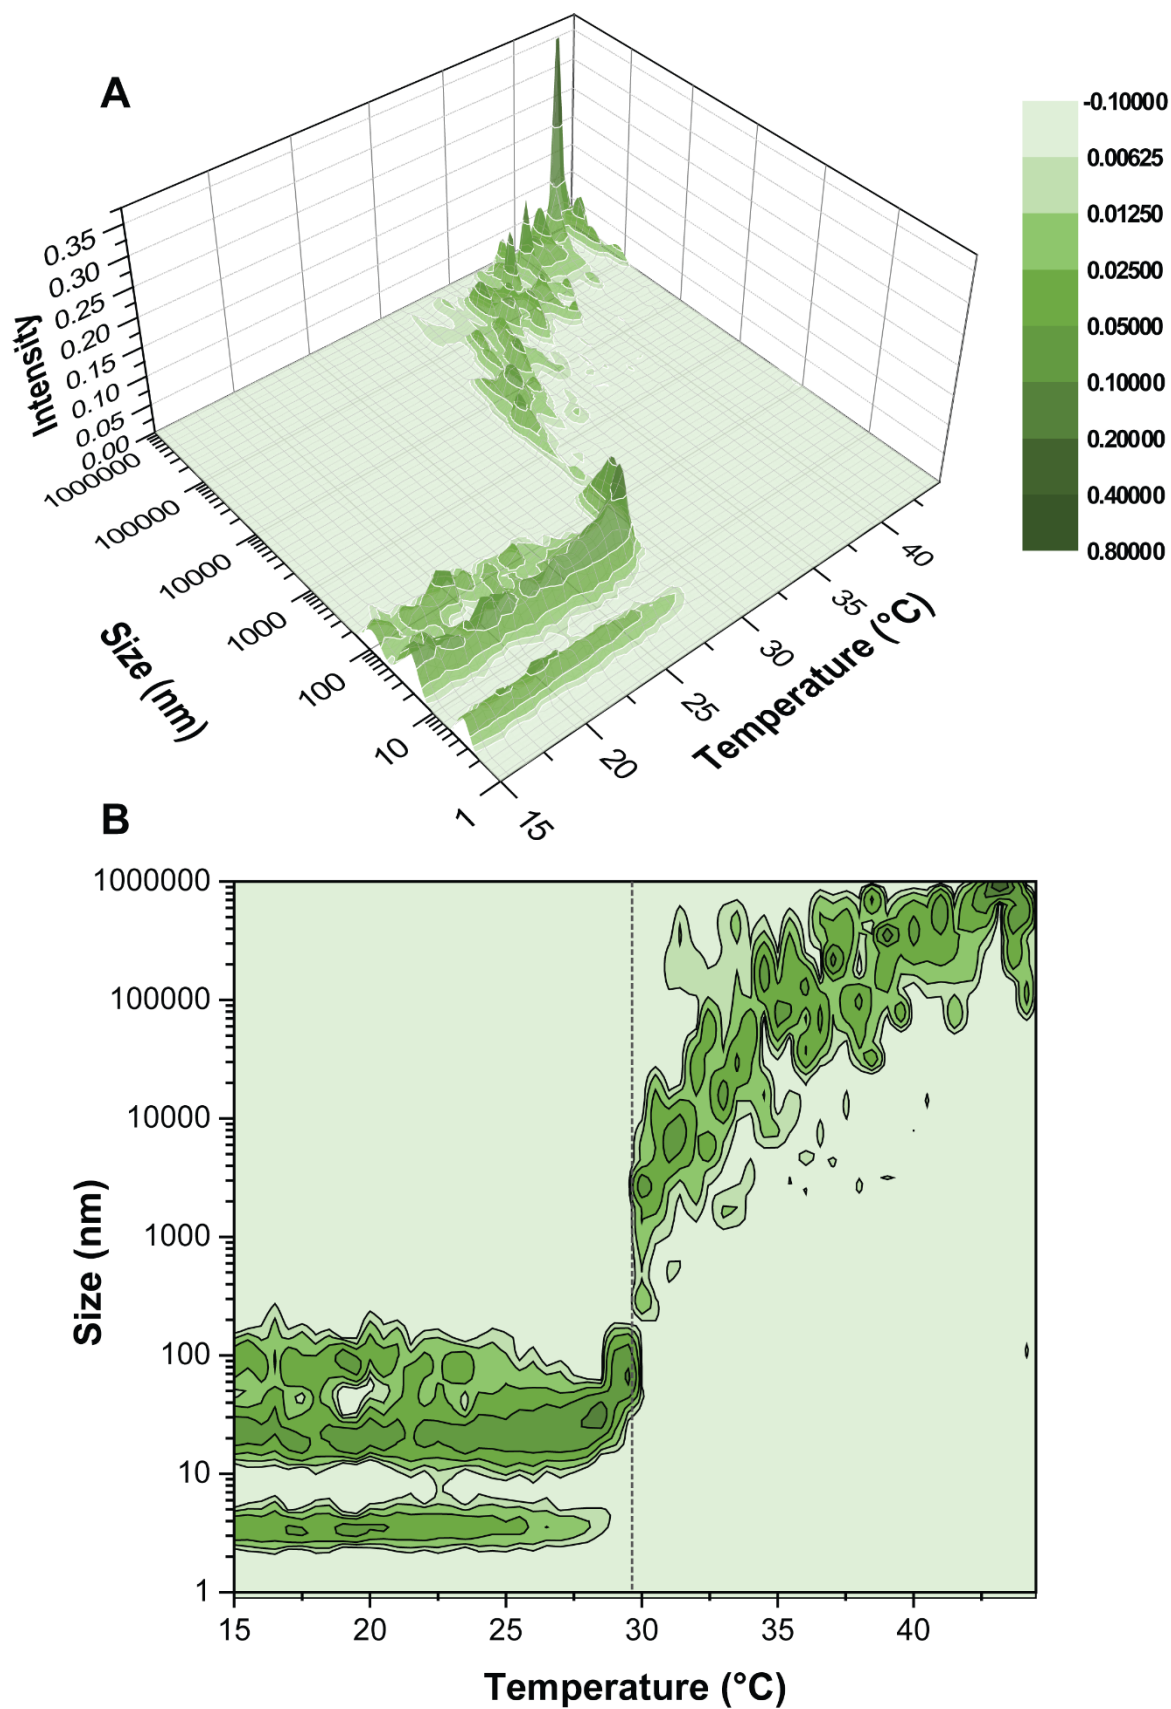

**Figure S48.** Size distributions of molecular assemblies of polymer **II** (10 mg/mL in PBS) as a function of temperature; depicted as 3D plot (A) and contour graph (B).  $T_{CP}$  (dashed line) was assigned to 30 °C. The measurement stopped prematurely because the size of the aggregates exceeded the detection limit.

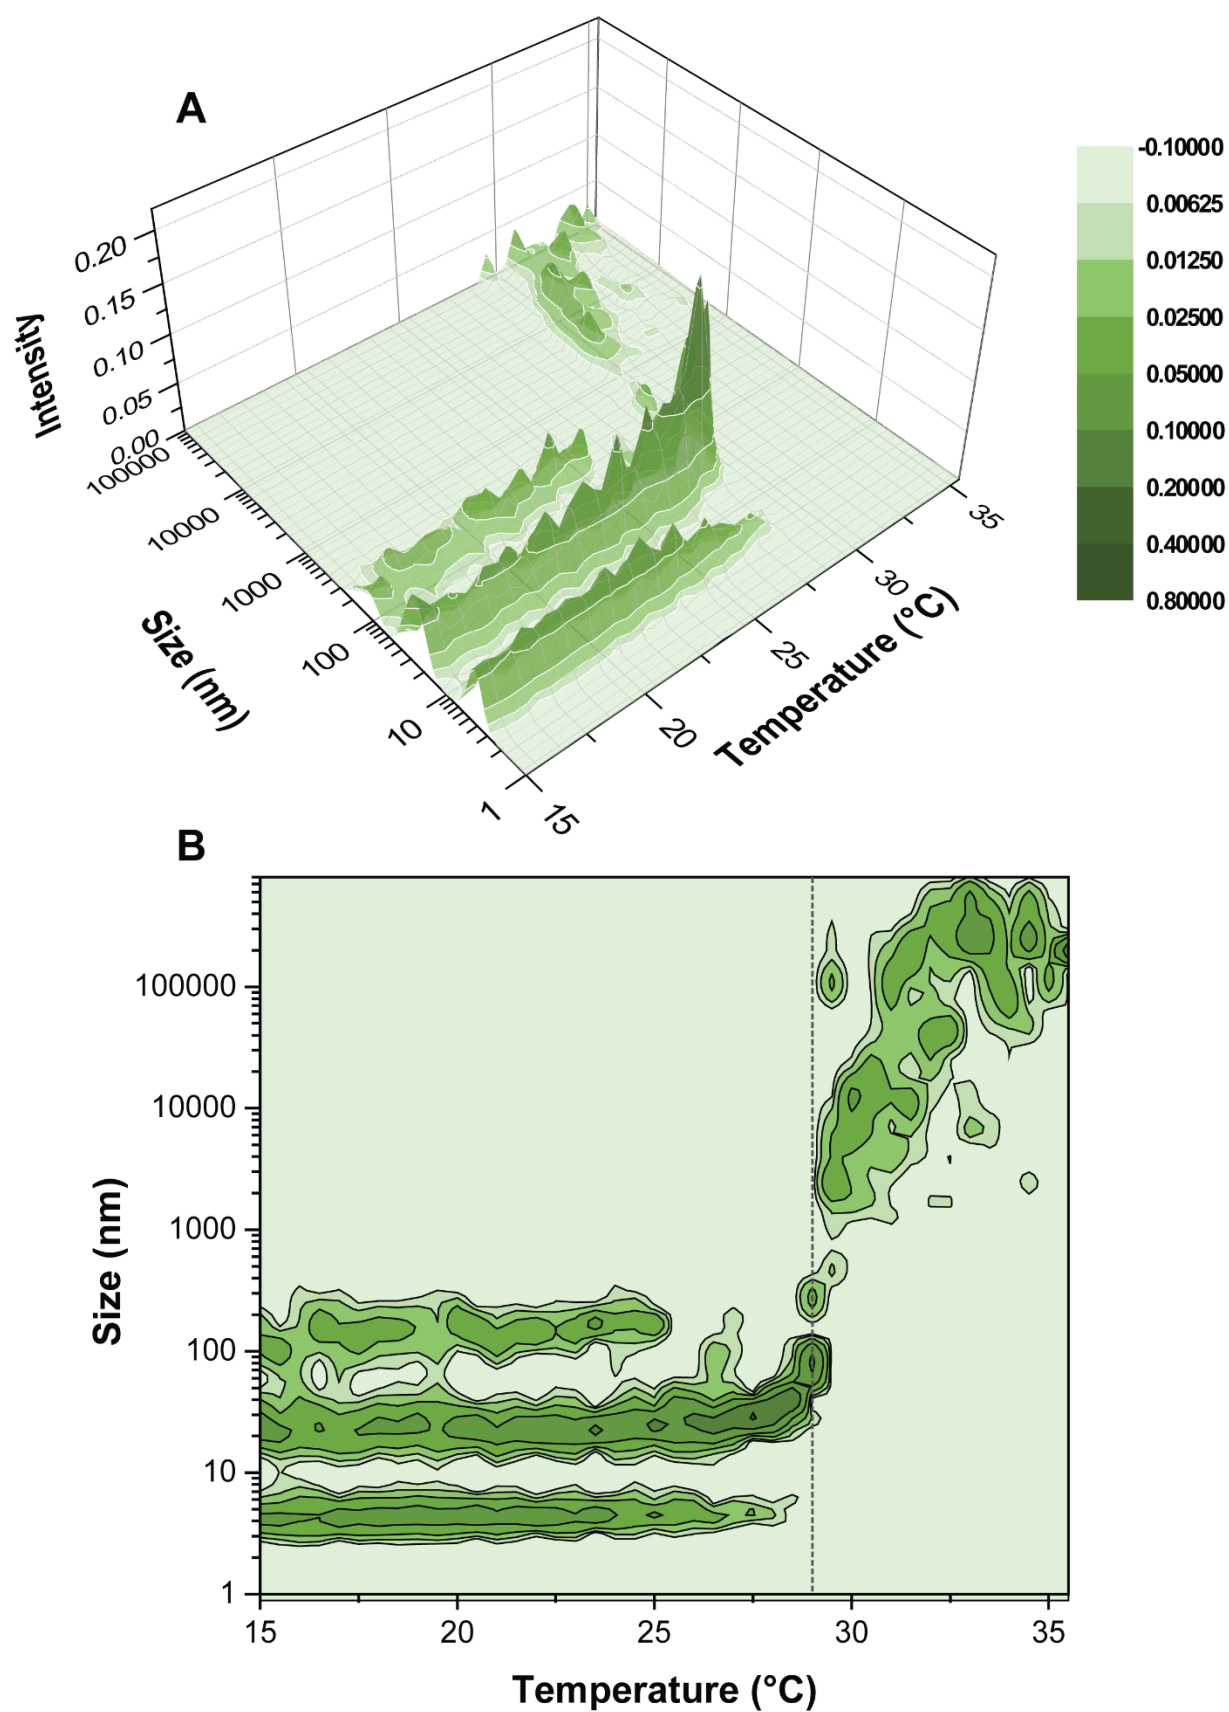

**Figure S49.** Size distributions of molecular assemblies of polymer **I2** (10 mg/mL in PBS) as a function of temperature; depicted as 3D plot (A) and contour graph (B).  $T_{CP}$  (dashed line) was assigned to 29 °C. The measurement stopped prematurely because the size of the aggregates exceeded the detection limit.

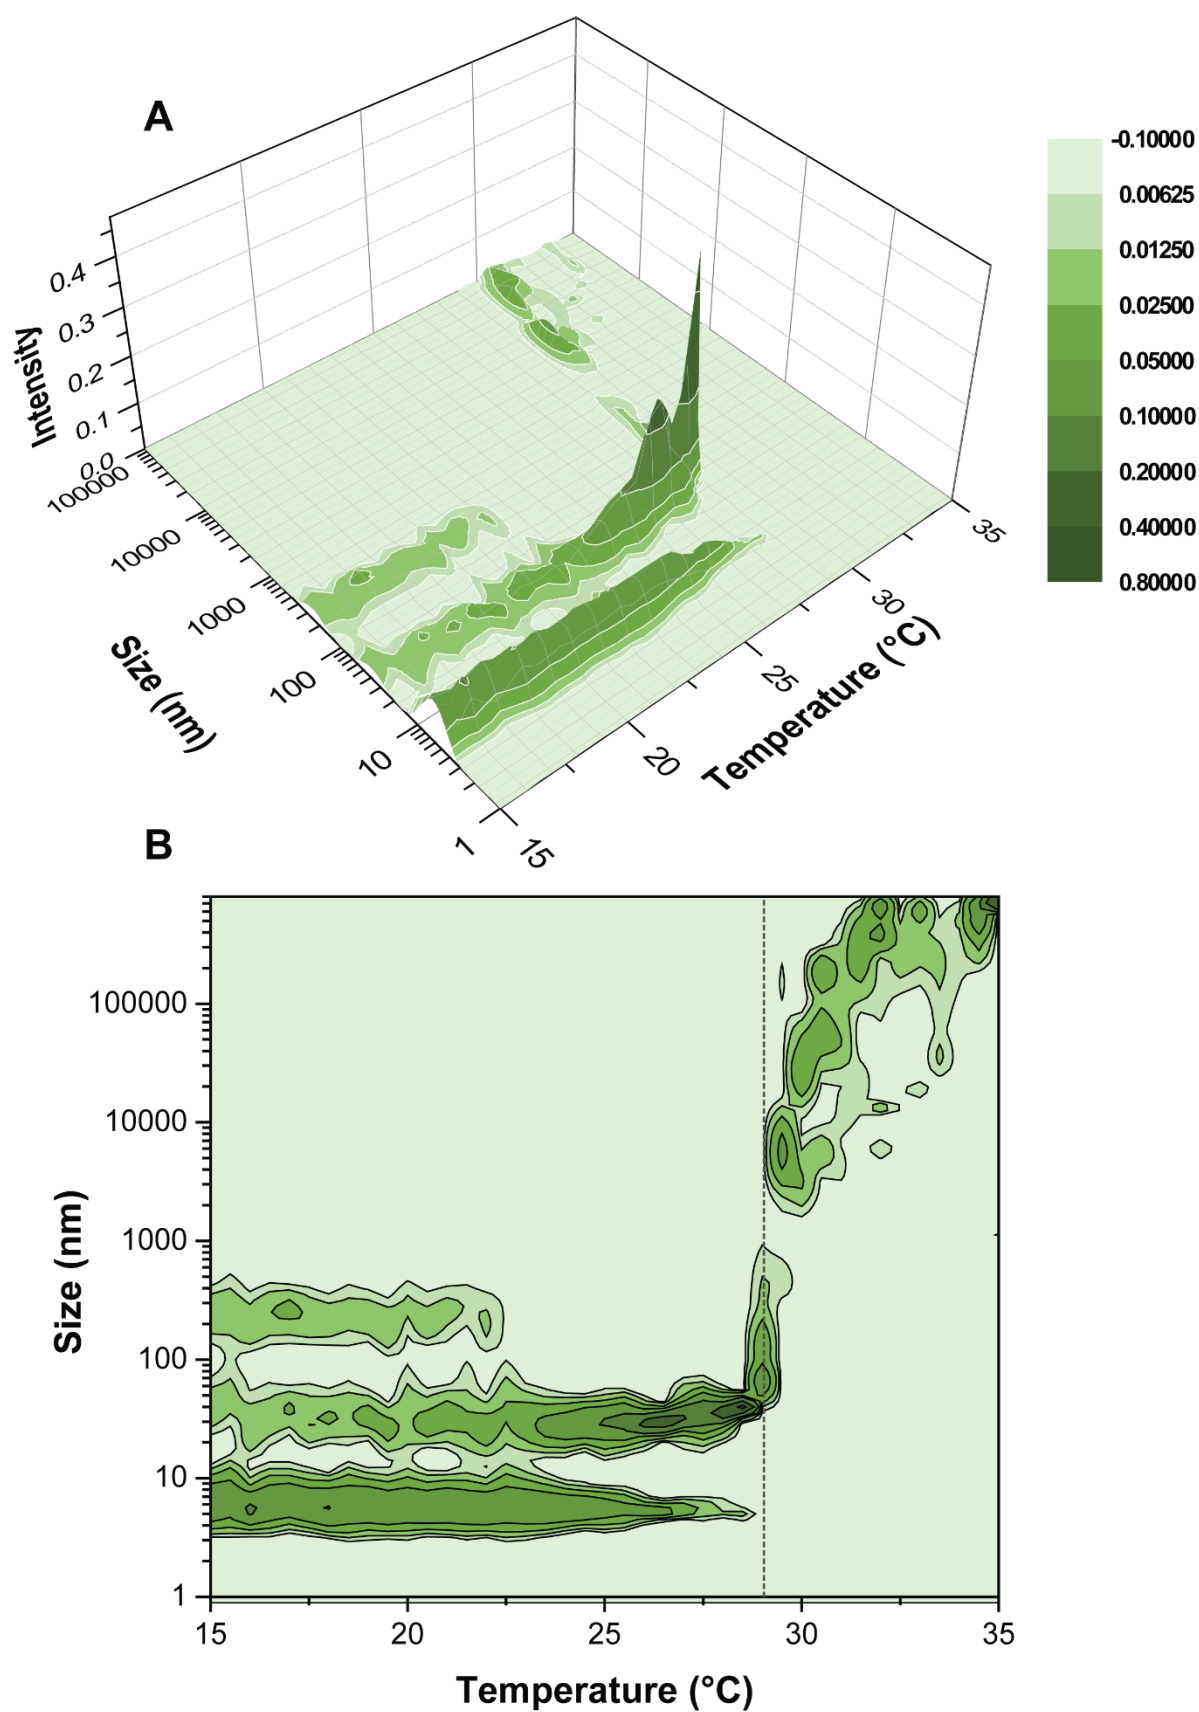

**Figure S50.** Size distributions of molecular assemblies of polymer **I3** (10 mg/mL in PBS) as a function of temperature; depicted as 3D plot (A) and contour graph (B).  $T_{CP}$  (dashed line) was assigned to 29 °C. The measurement stopped prematurely because the size of the aggregates exceeded the detection limit.

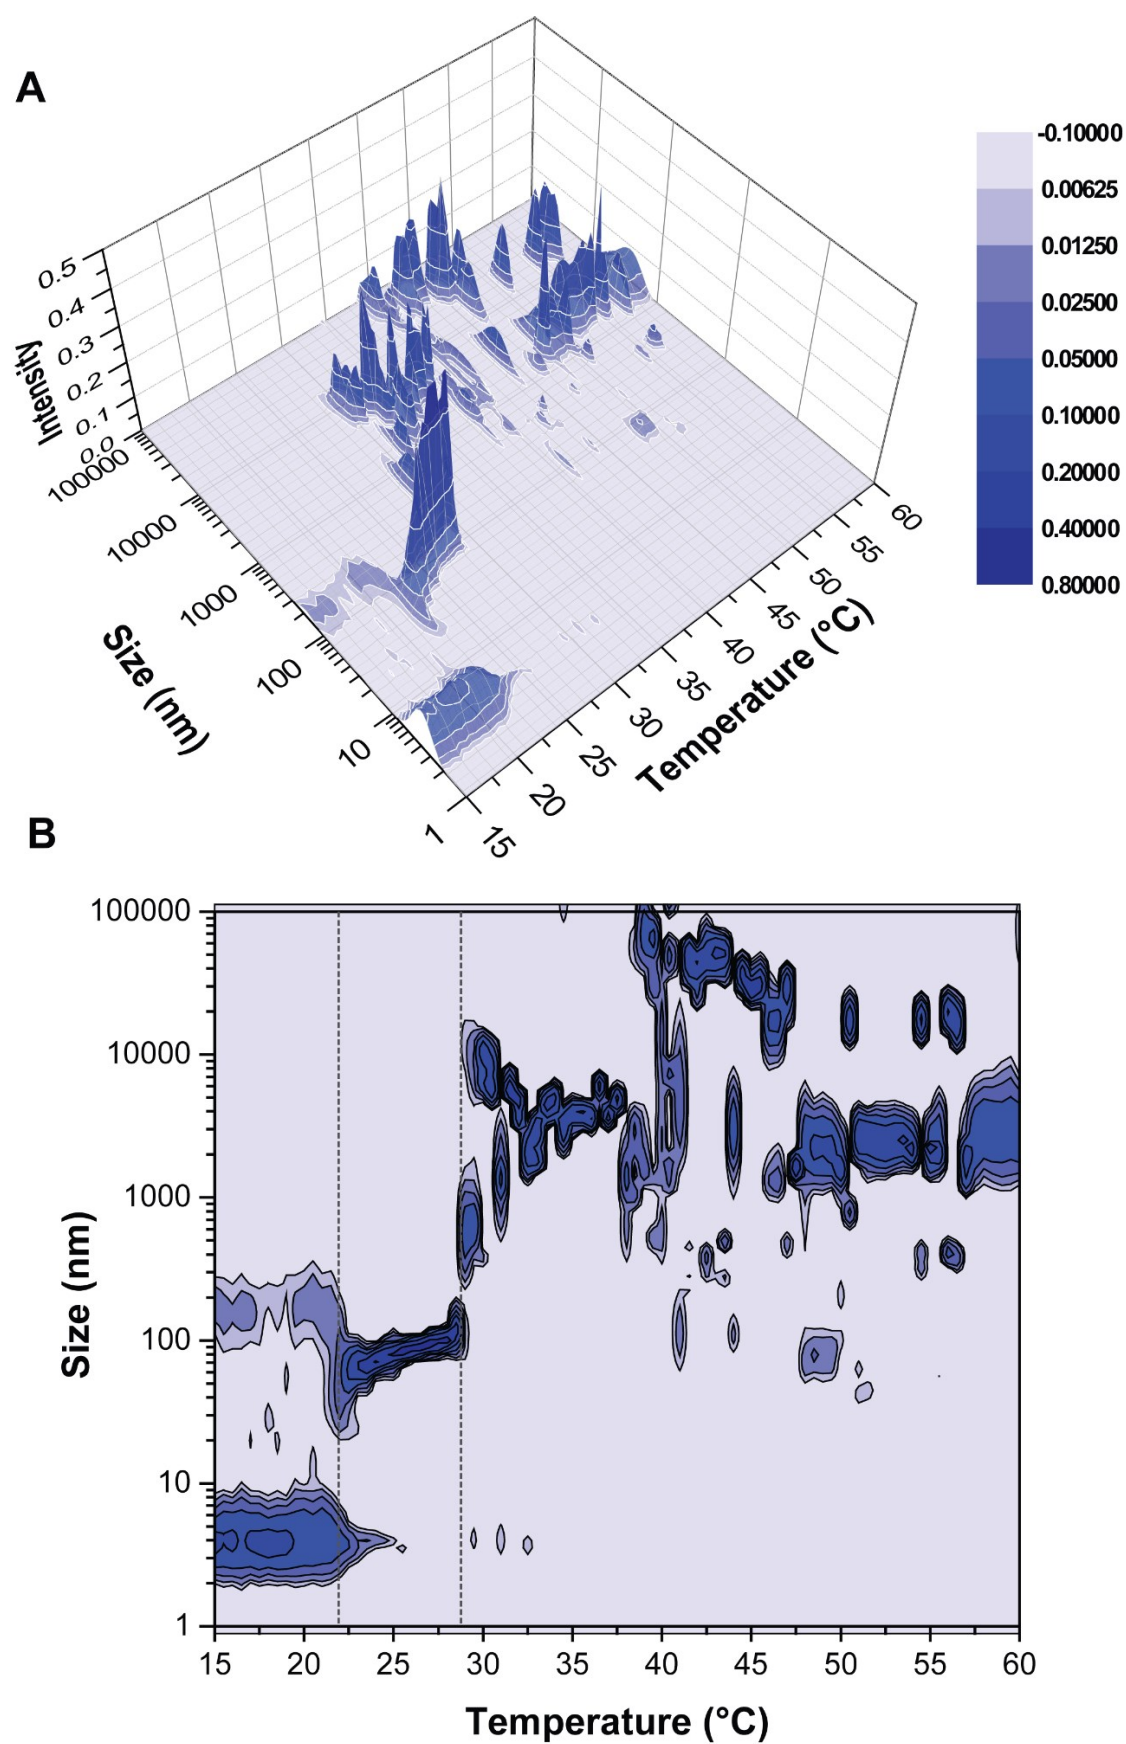

**Figure S51.** Size distributions of molecular assemblies of polymer **E1** (10 mg/mL in PBS) as a function of temperature; depicted as 3D plot (A) and contour graph (B).  $T_{CP1}$  (dashed lines) was assigned to 22 °C,  $T_{CP2}$  was assigned to 28 °C.



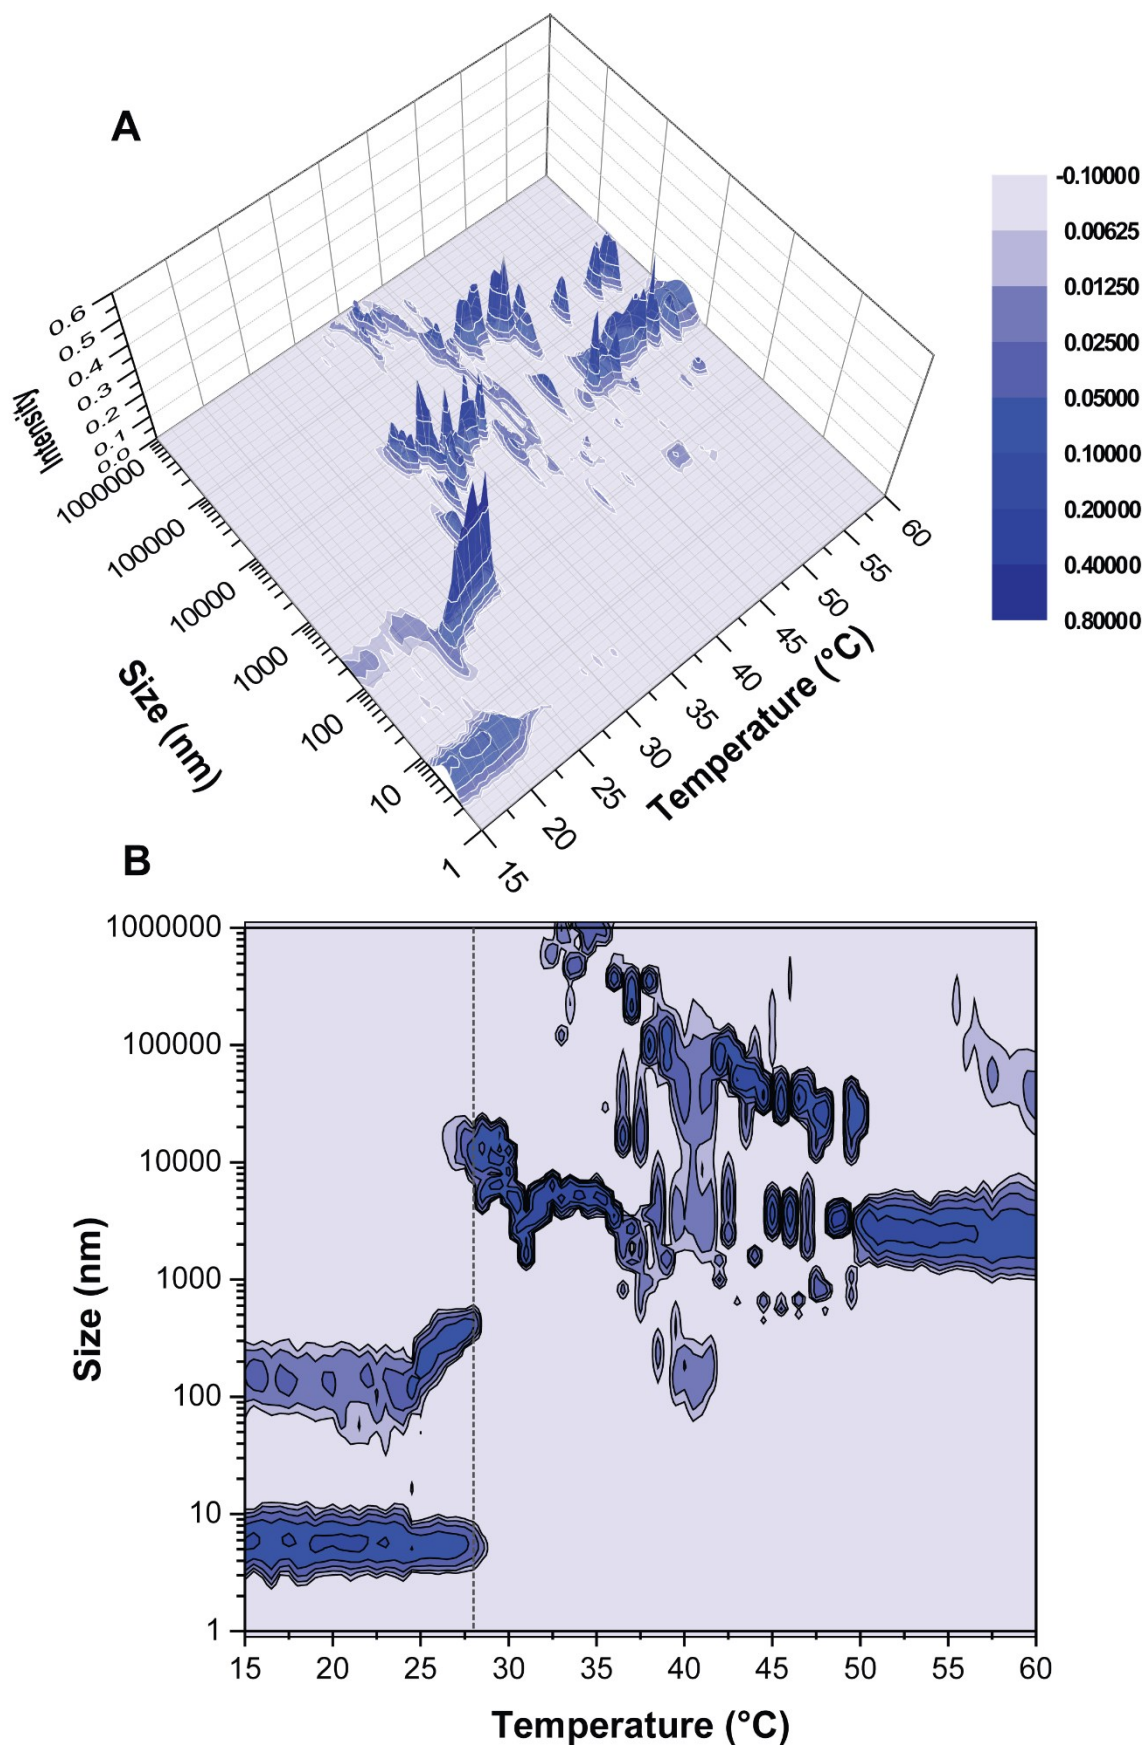

**Figure S52.** Size distributions of molecular assemblies of polymer **E2** (10 mg/mL in PBS) as a function of temperature; depicted as 3D plot (A) and contour graph (B).  $T_{CP}$  (dashed line) was assigned to 28 °C. The measurement stopped prematurely because the size of the aggregates exceeded the detection limit.

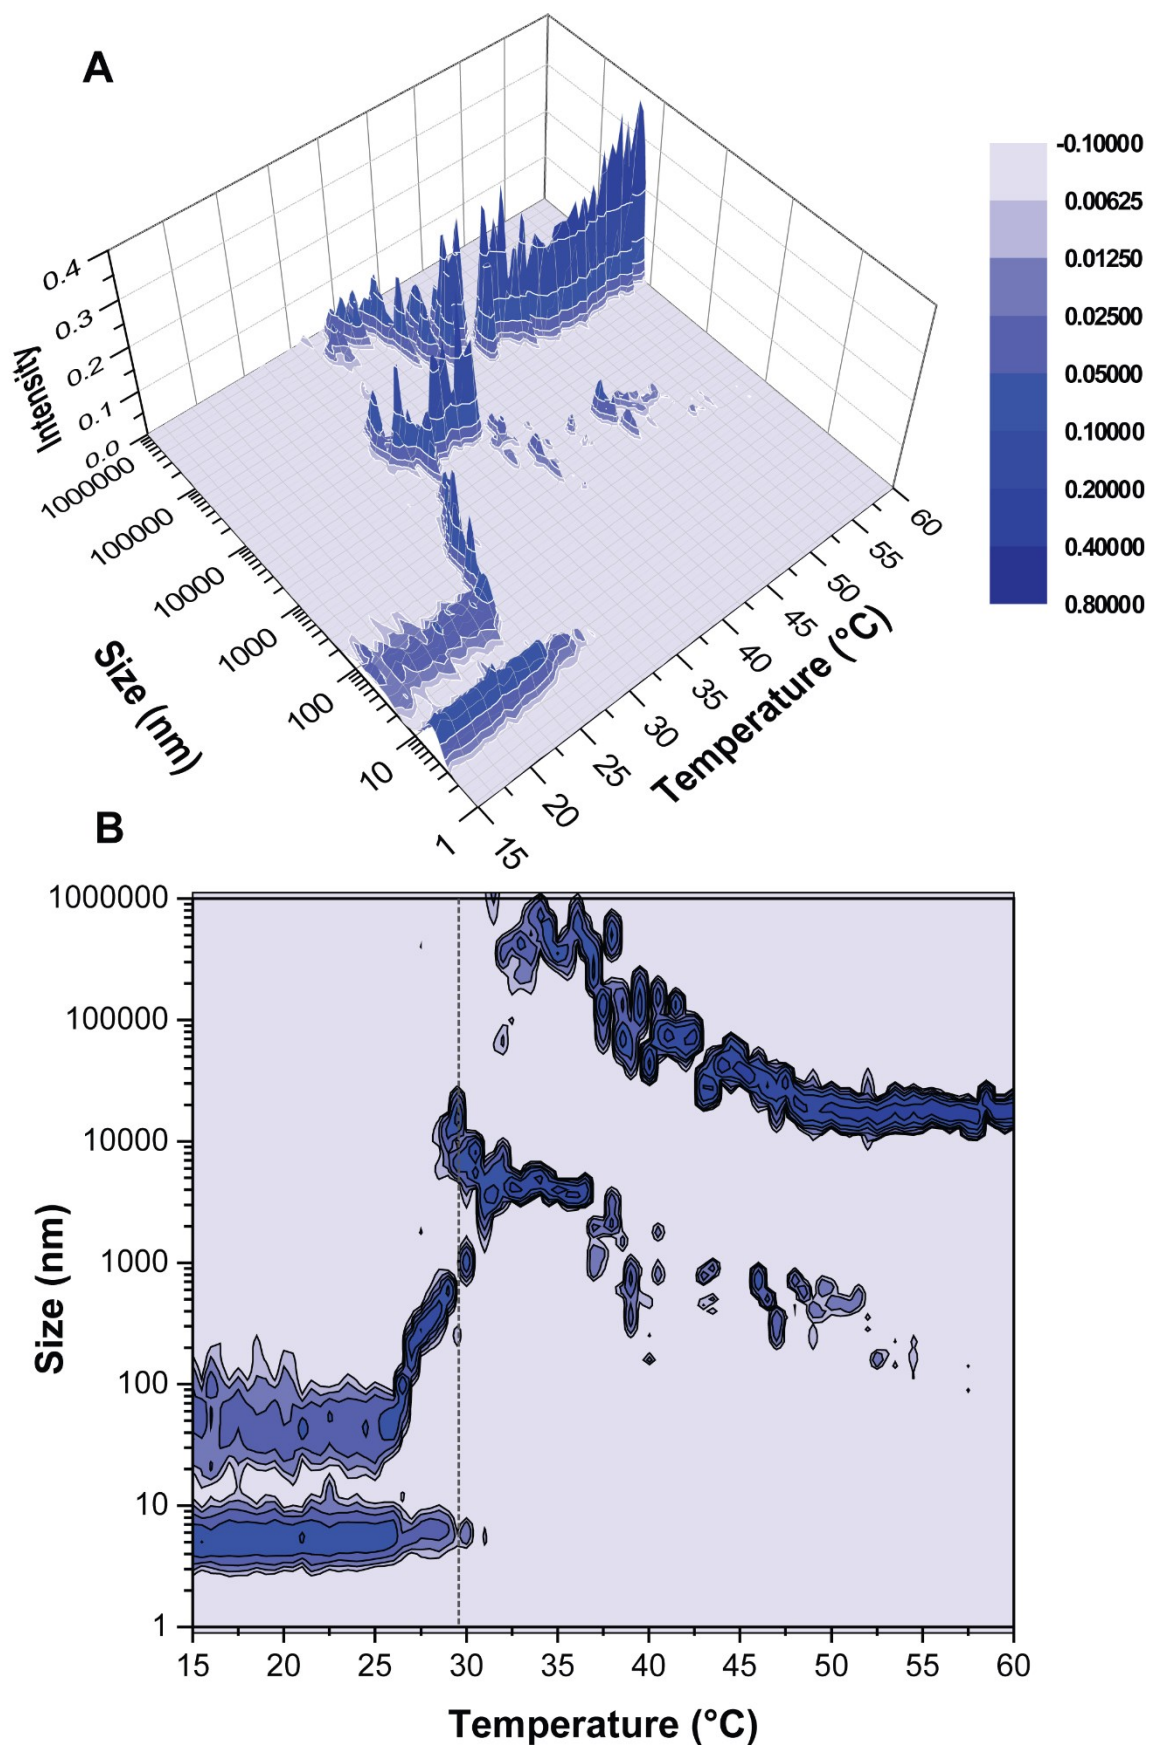

**Figure S53.** Size distributions of molecular assemblies of polymer **E3** (10 mg/mL in PBS) as a function of temperature; depicted as 3D plot (A) and contour graph (B).  $T_{CP}$  (dashed line) was assigned to 29 °C. The measurement stopped prematurely because the size of the aggregates exceeded the detection limit.

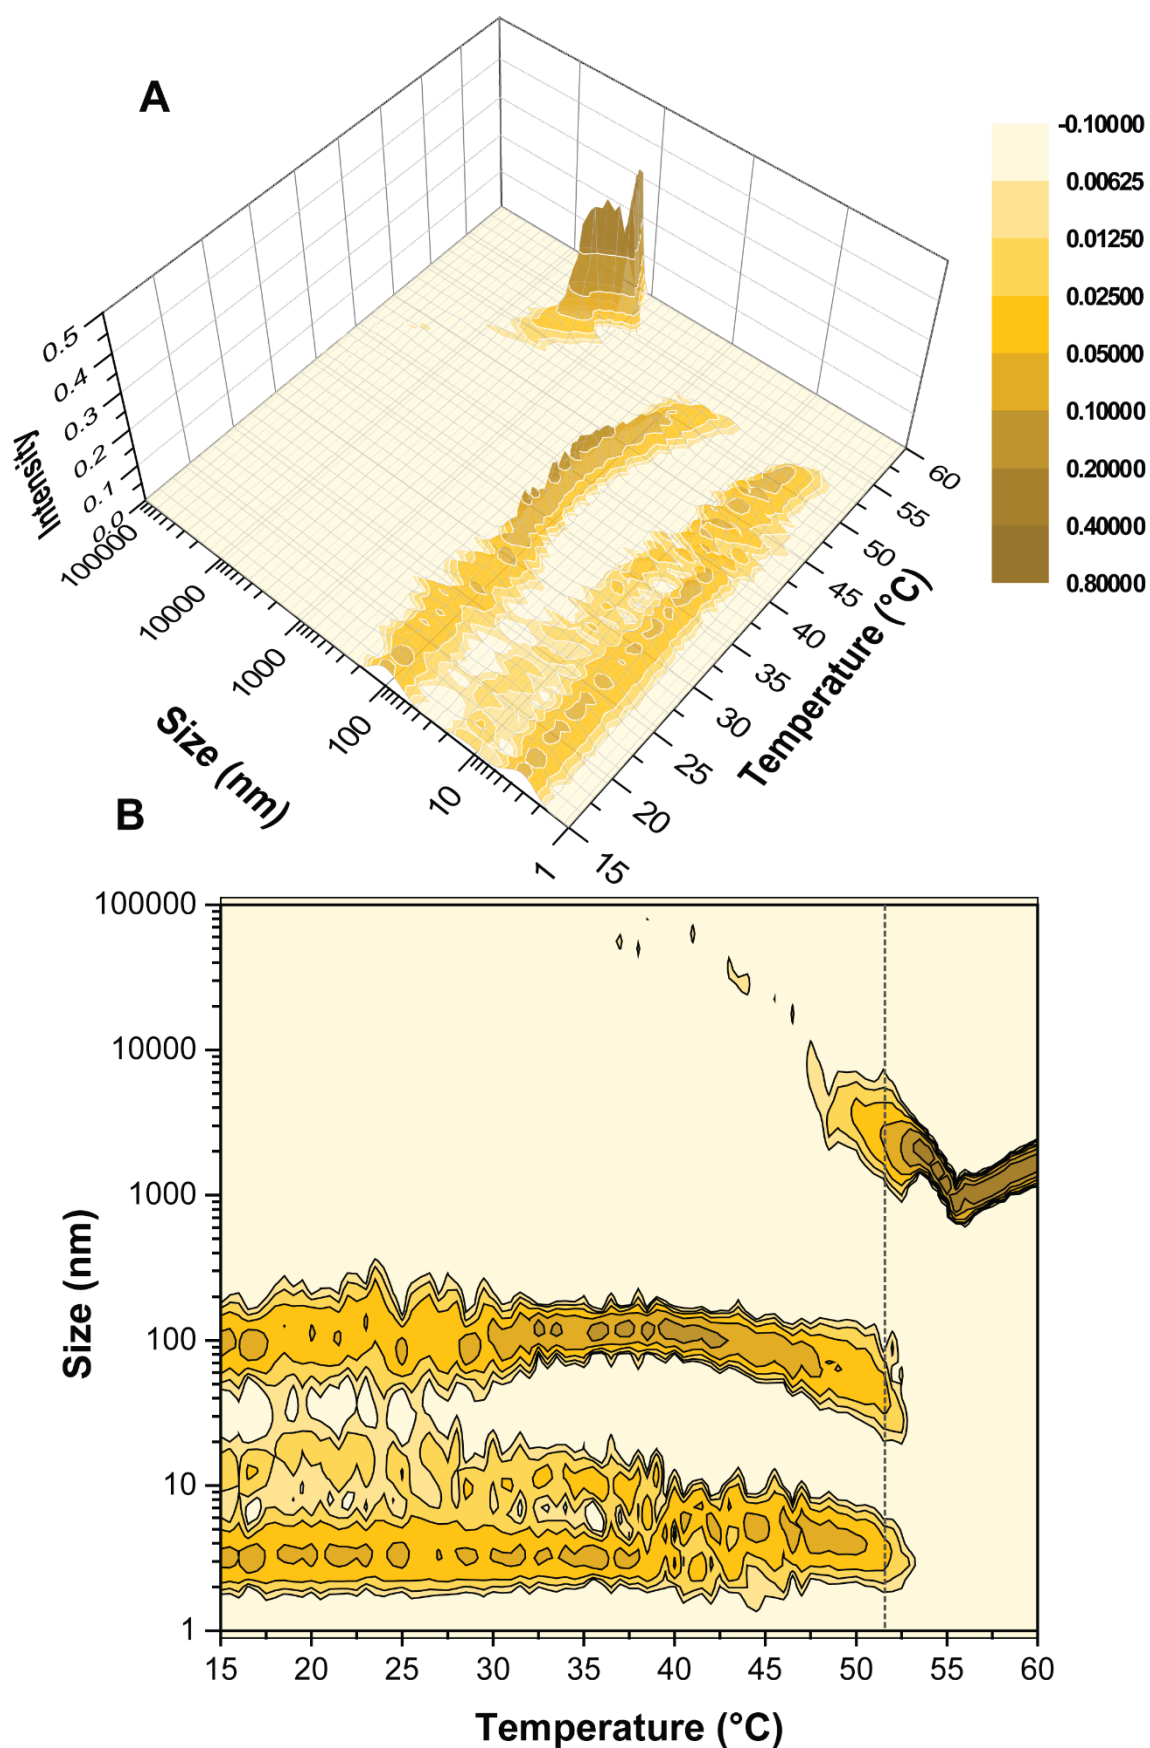

**Figure S54.** Size distributions of molecular assemblies of polymer **P1** (10 mg/mL in PBS) as a function of temperature; depicted as 3D plot (A) and contour graph (B).  $T_{CP}$  (dashed line) was assigned to 52 °C. The measurement stopped prematurely because the size of the aggregates exceeded the detection limit.



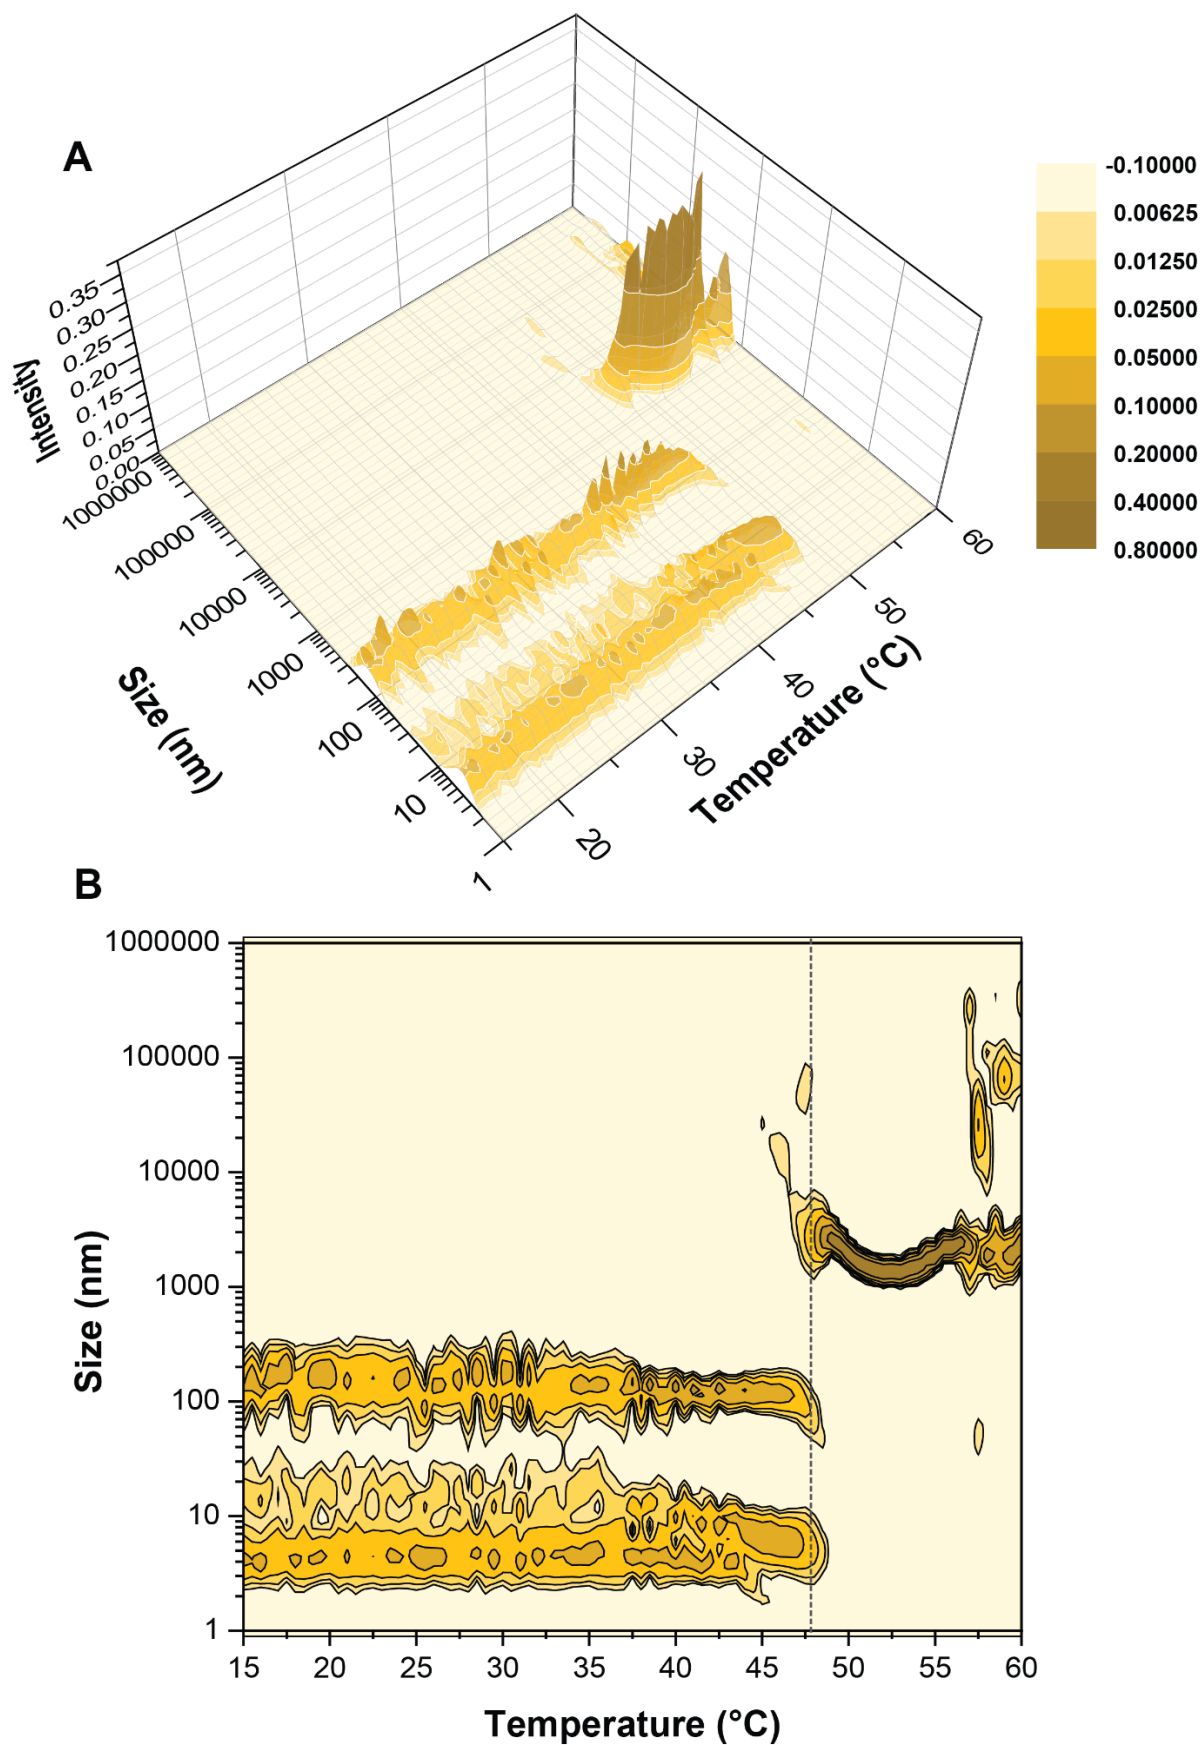

**Figure S55.** Size distributions of molecular assemblies of polymer **P2** (10 mg/mL in PBS) as a function of temperature; depicted as 3D plot (A) and contour graph (B).  $T_{CP}$  (dashed line) was assigned to 48 °C. The measurement stopped prematurely because the size of the aggregates exceeded the detection limit.



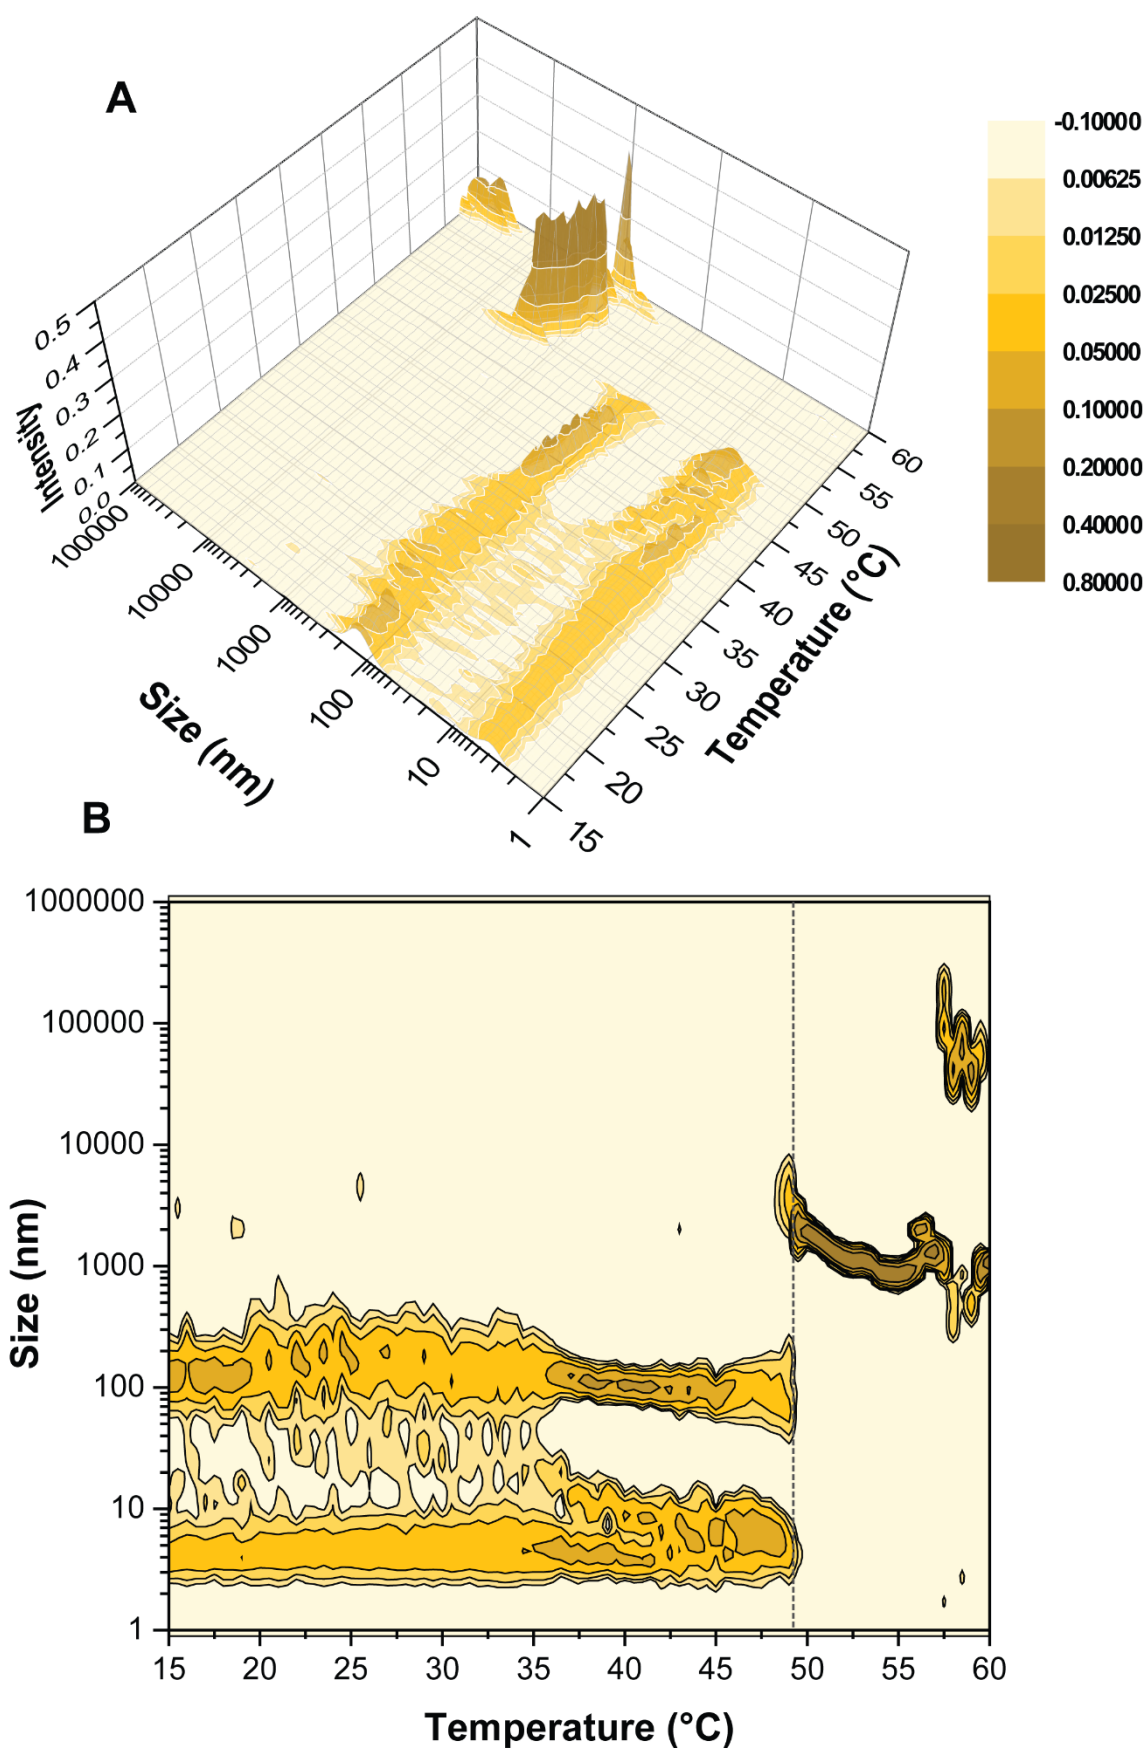

**Figure S56.** Size distributions of molecular assemblies of polymer P3 (10 mg/mL in PBS) as a function of temperature; depicted as 3D plot (A) and contour graph (B).  $T_{CP}$  (dashed line) was assigned to 49 °C. The measurement stopped prematurely because the size of the aggregates exceeded the detection limit.

**S9. Refractive index increment ( $dn/dc$ )**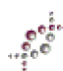

Brookhaven Instruments Corp.  
Differential Refractometer Software Ver. 5.32

Date: Jul 29, 2021  
Time: 10:54:38

Sample ID **F1, PBS**

Operator ID **PC**

Notes

$dn/dc$  (mL/g) Measured =  $8.832e-02 \pm 3.0e-03$

Wavelength = 620.0 nm  
Source Intensity = 80%  
Temperature = 31.0 deg. C  
Calibration Date = 07/27/21  
Calibration Time = 14:08:09  
Calibration Constant ( $V^{-1}$ ) =  $3.925e-04$

Solvent = Water  
Refractive Index = 1.331  
Calibration Solution = KCl/Water

Concentrations Measured (mg/mL)

1.  $3.344e-01$
2.  $6.687e-01$

3.  $1.337e+00$
4.  $2.657e+00$

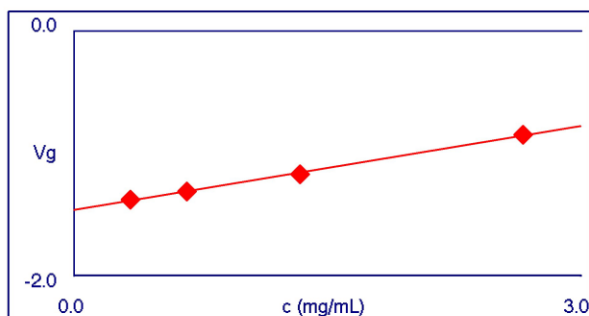

$V_g$  intercept =  $-1.464e+00$

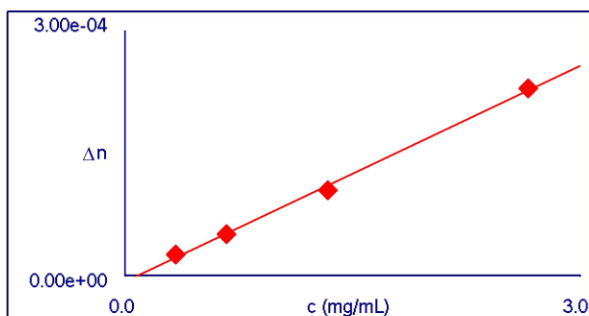

$dn/dc$  (mL/g) =  $8.832e-02 \pm 3.0e-03$

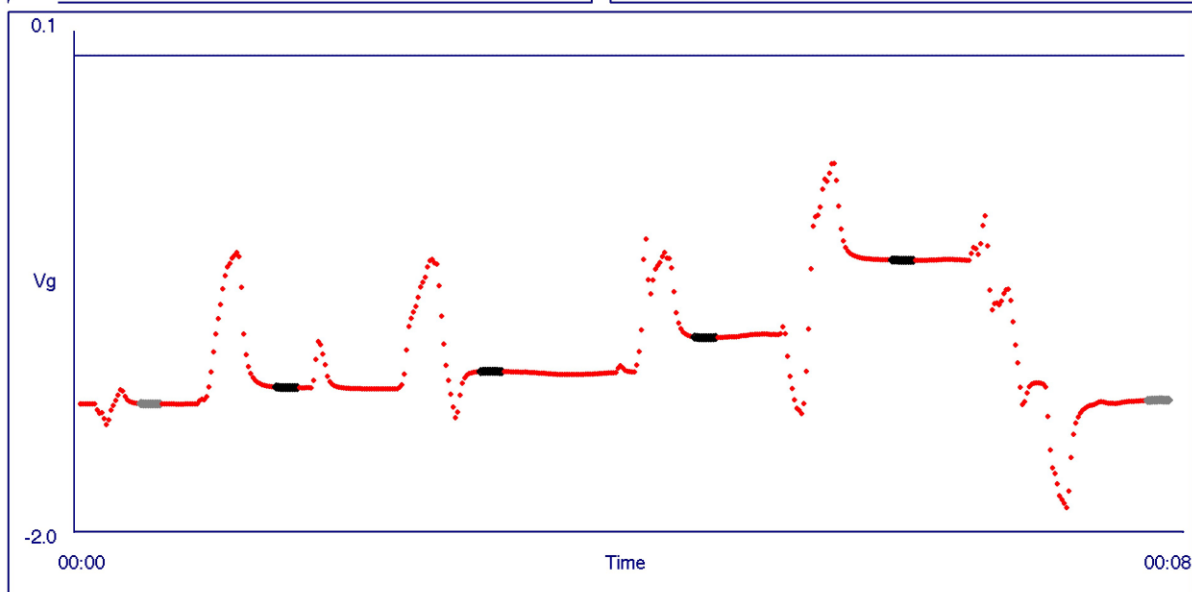

**Figure S57.** Refractive index increment ( $dn/dc$ ) measurement report of **F1 (pDFEA)** in PBS

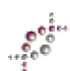

Brookhaven Instruments Corp.  
Differential Refractometer Software Ver. 5.32

Date: Jul 29, 2021  
Time: 11:06:16

Sample ID **F2, PBS**

Operator ID **PC**

Notes

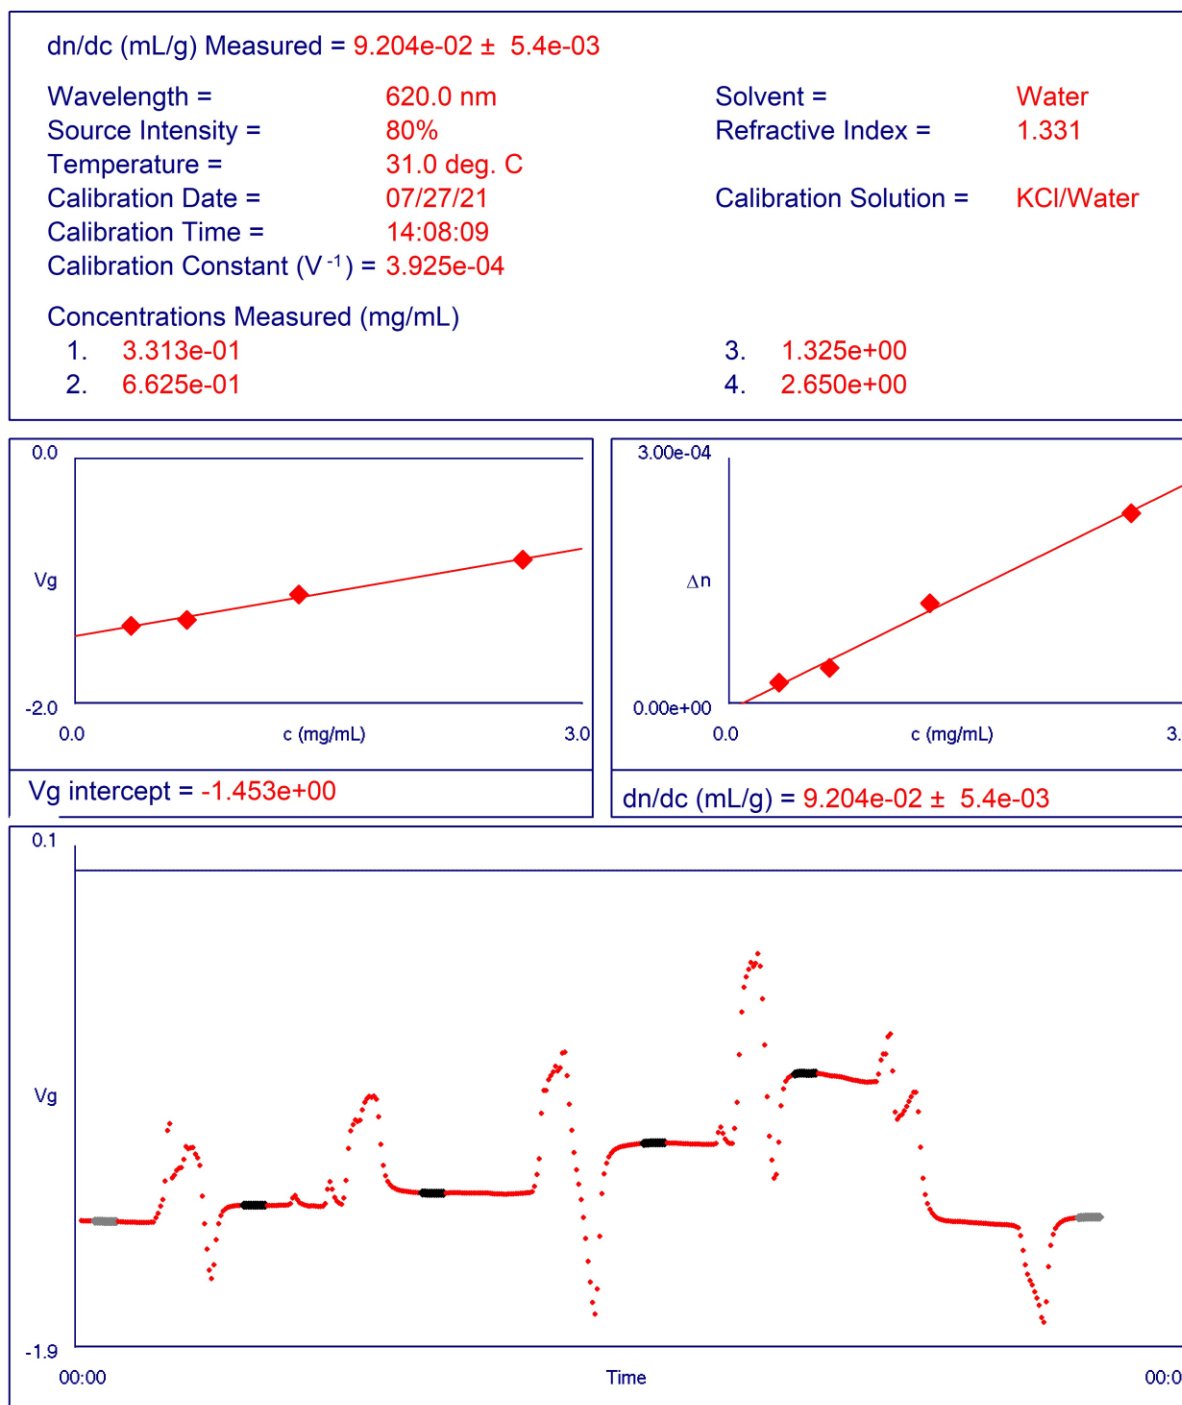

**Figure S58.** Refractive index increment ( $dn/dc$ ) measurement report of **F2 (pDFEA)** in PBS

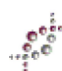

Brookhaven Instruments Corp.  
Differential Refractometer Software Ver. 5.32

Date: Jul 29, 2021  
Time: 11:15:27

Sample ID **F3, PBS**

Operator ID **PC**

Notes

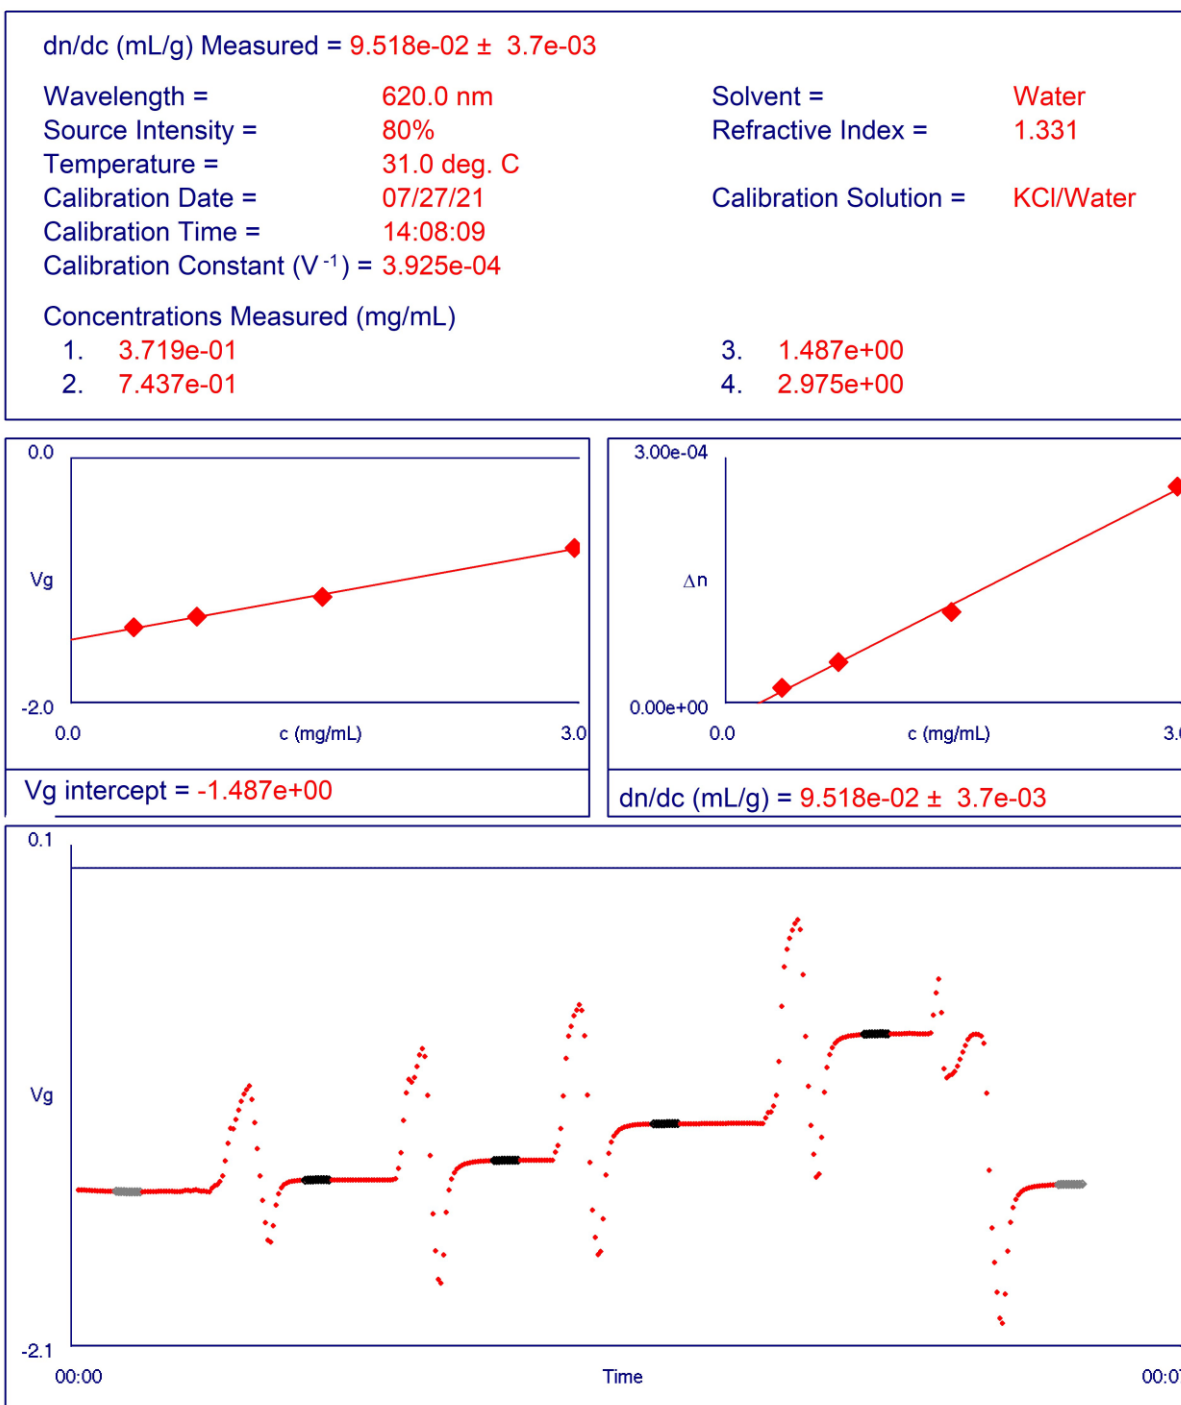

**Figure S59.** Refractive index increment ( $dn/dc$ ) measurement report of **F3 (pDfEA)** in PBS

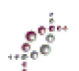

Brookhaven Instruments Corp.  
Differential Refractometer Software Ver. 5.32

Date: Jul 29, 2021  
Time: 12:14:20

Sample ID **I1, PBS**

Operator ID **PC**

Notes

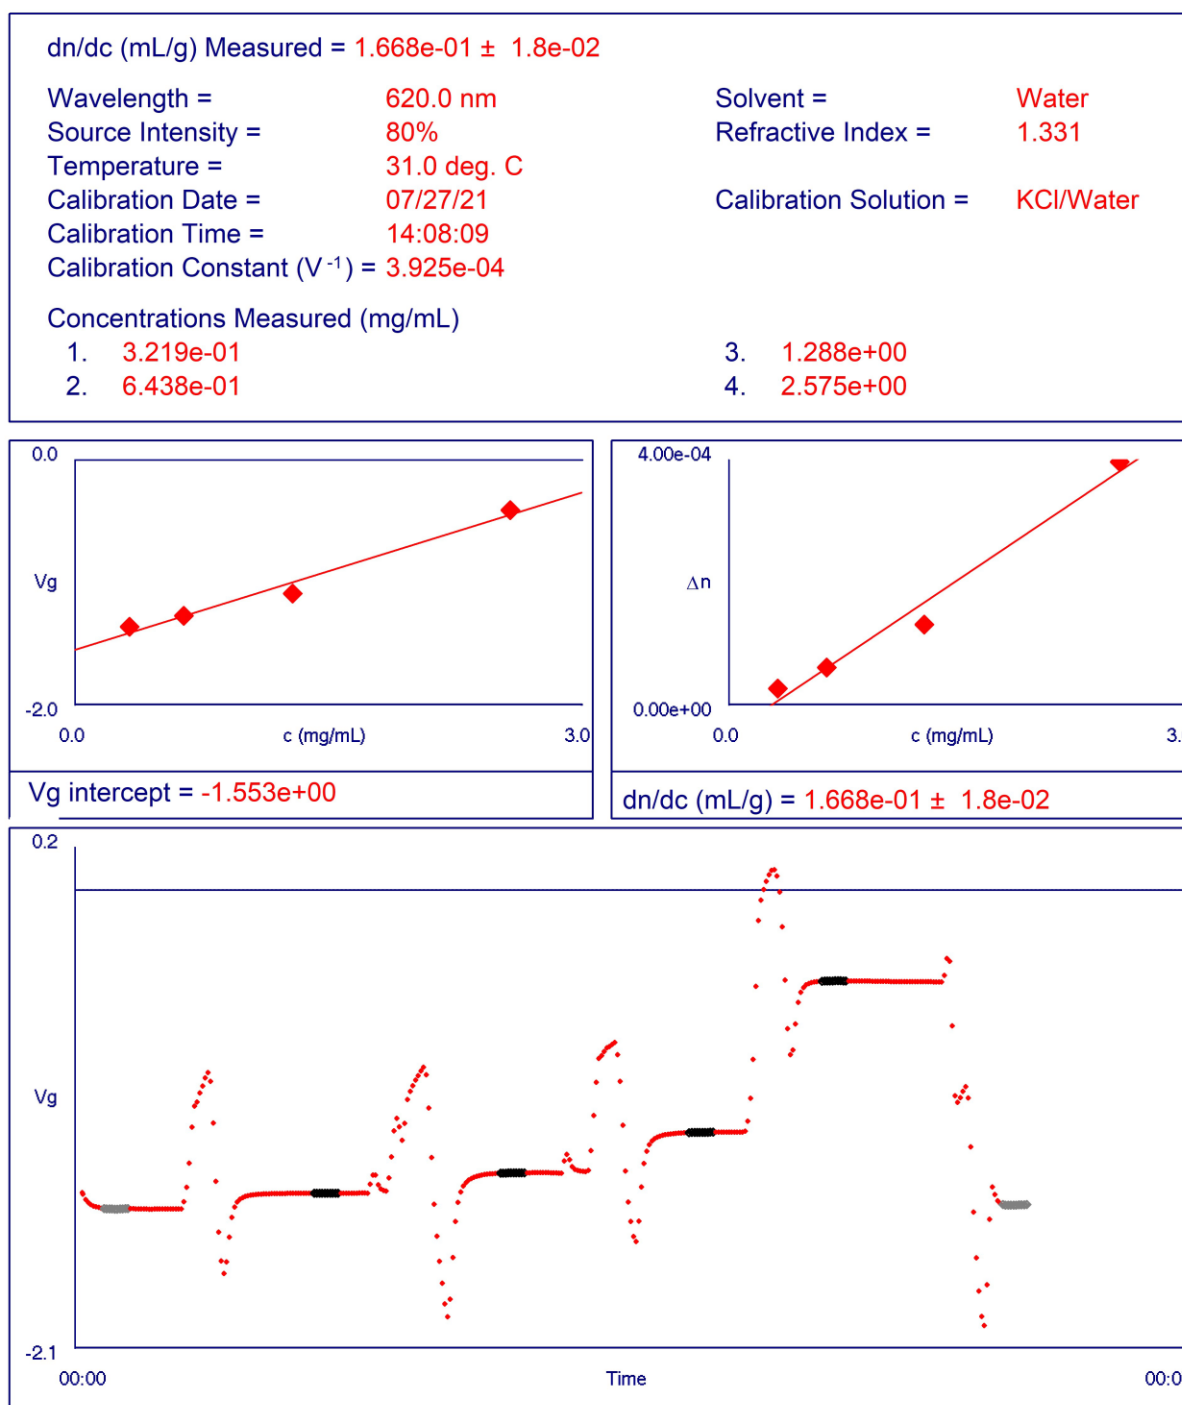

**Figure S60.** Refractive index increment (dn/dc) measurement report of **I1 (pNIPAM)** in PBS

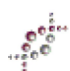

Brookhaven Instruments Corp.  
Differential Refractometer Software Ver. 5.32

Date: Jul 29, 2021  
Time: 12:26:10

Sample ID **I2, PBS**

Operator ID **PC**

Notes

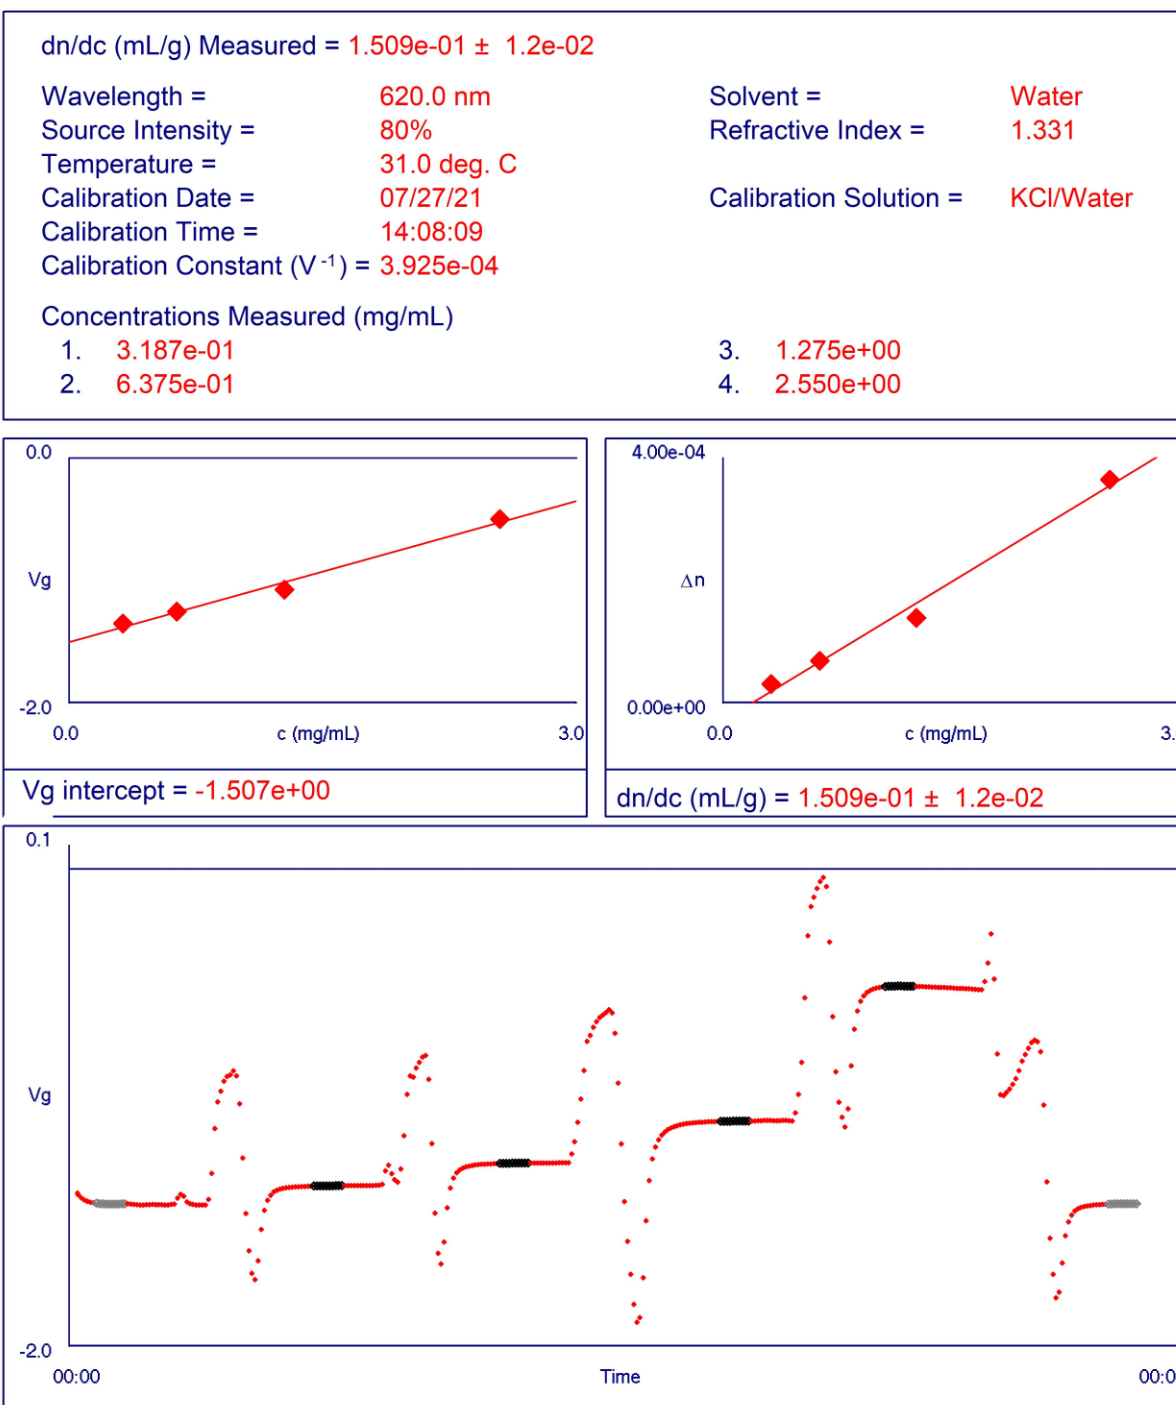

**Figure S61.** Refractive index increment (dn/dc) measurement report of **I2 (pNIPAM)** in PBS

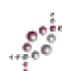

Brookhaven Instruments Corp.  
Differential Refractometer Software Ver. 5.32

Date: Jul 29, 2021  
Time: 12:33:07

Sample ID **I3, PBS**

Operator ID **PC**

Notes

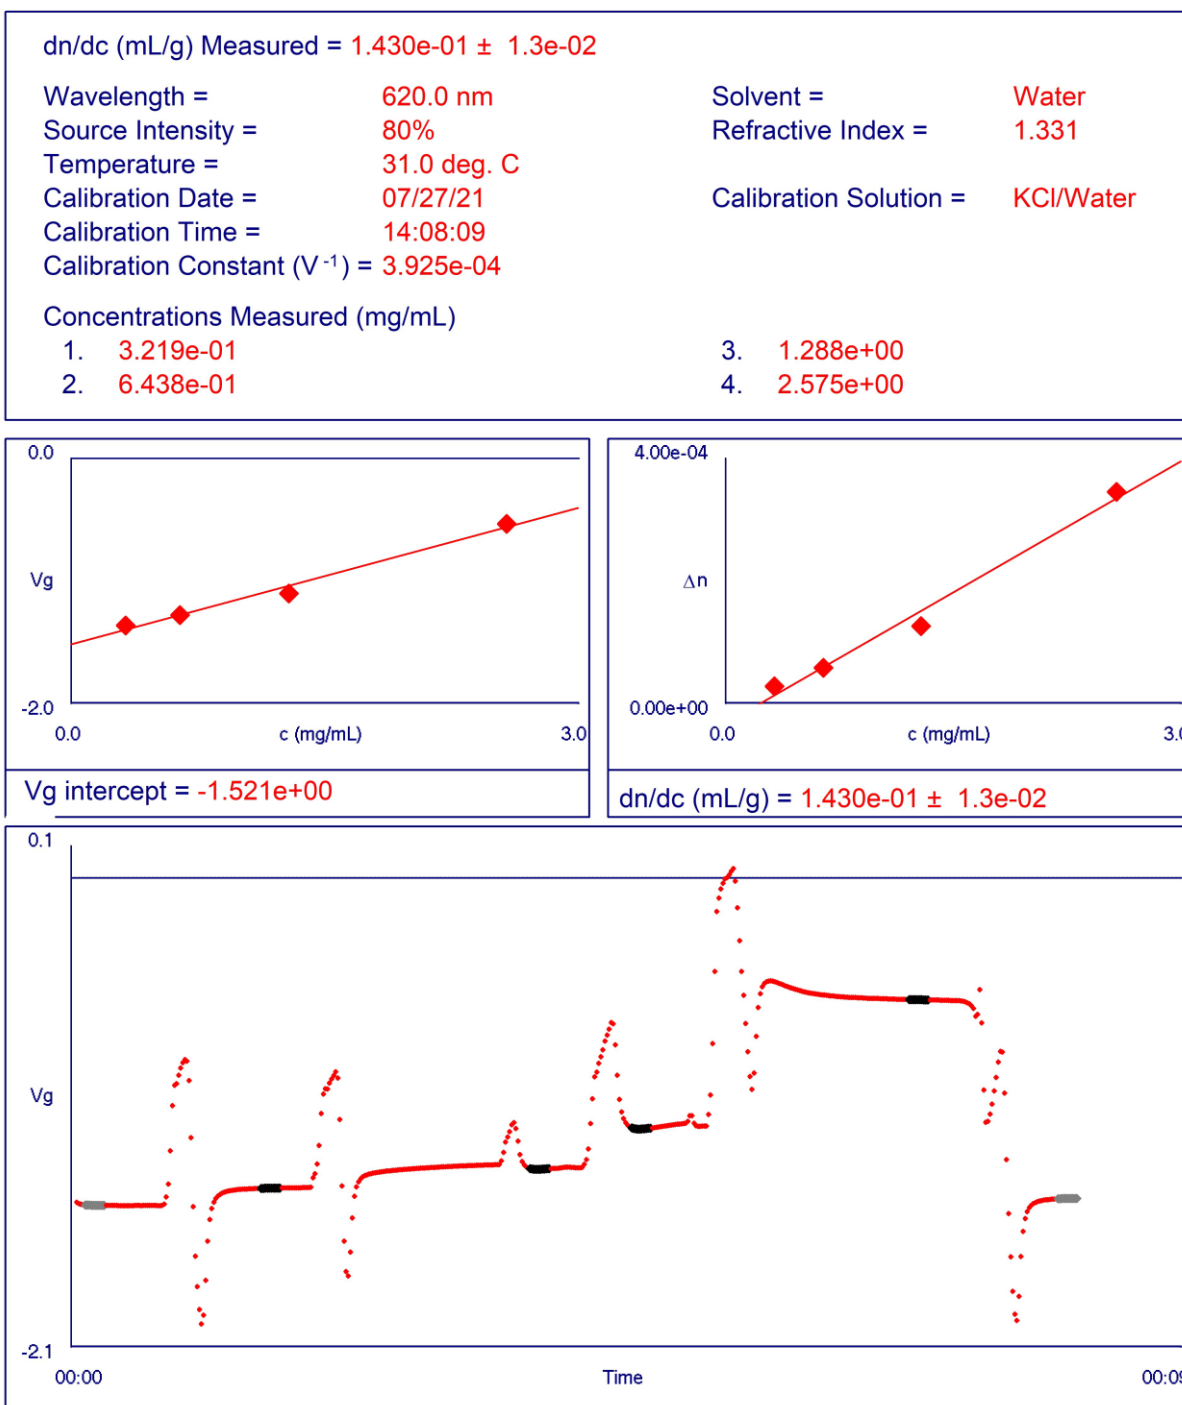

**Figure S62.** Refractive index increment ( $dn/dc$ ) measurement report of **I3 (pNIPAM)** in PBS



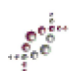

Brookhaven Instruments Corp.  
Differential Refractometer Software Ver. 5.32

Date: Jul 30, 2021  
Time: 11:08:22

Sample ID **E1, PBS**

Operator ID **PC**

Notes

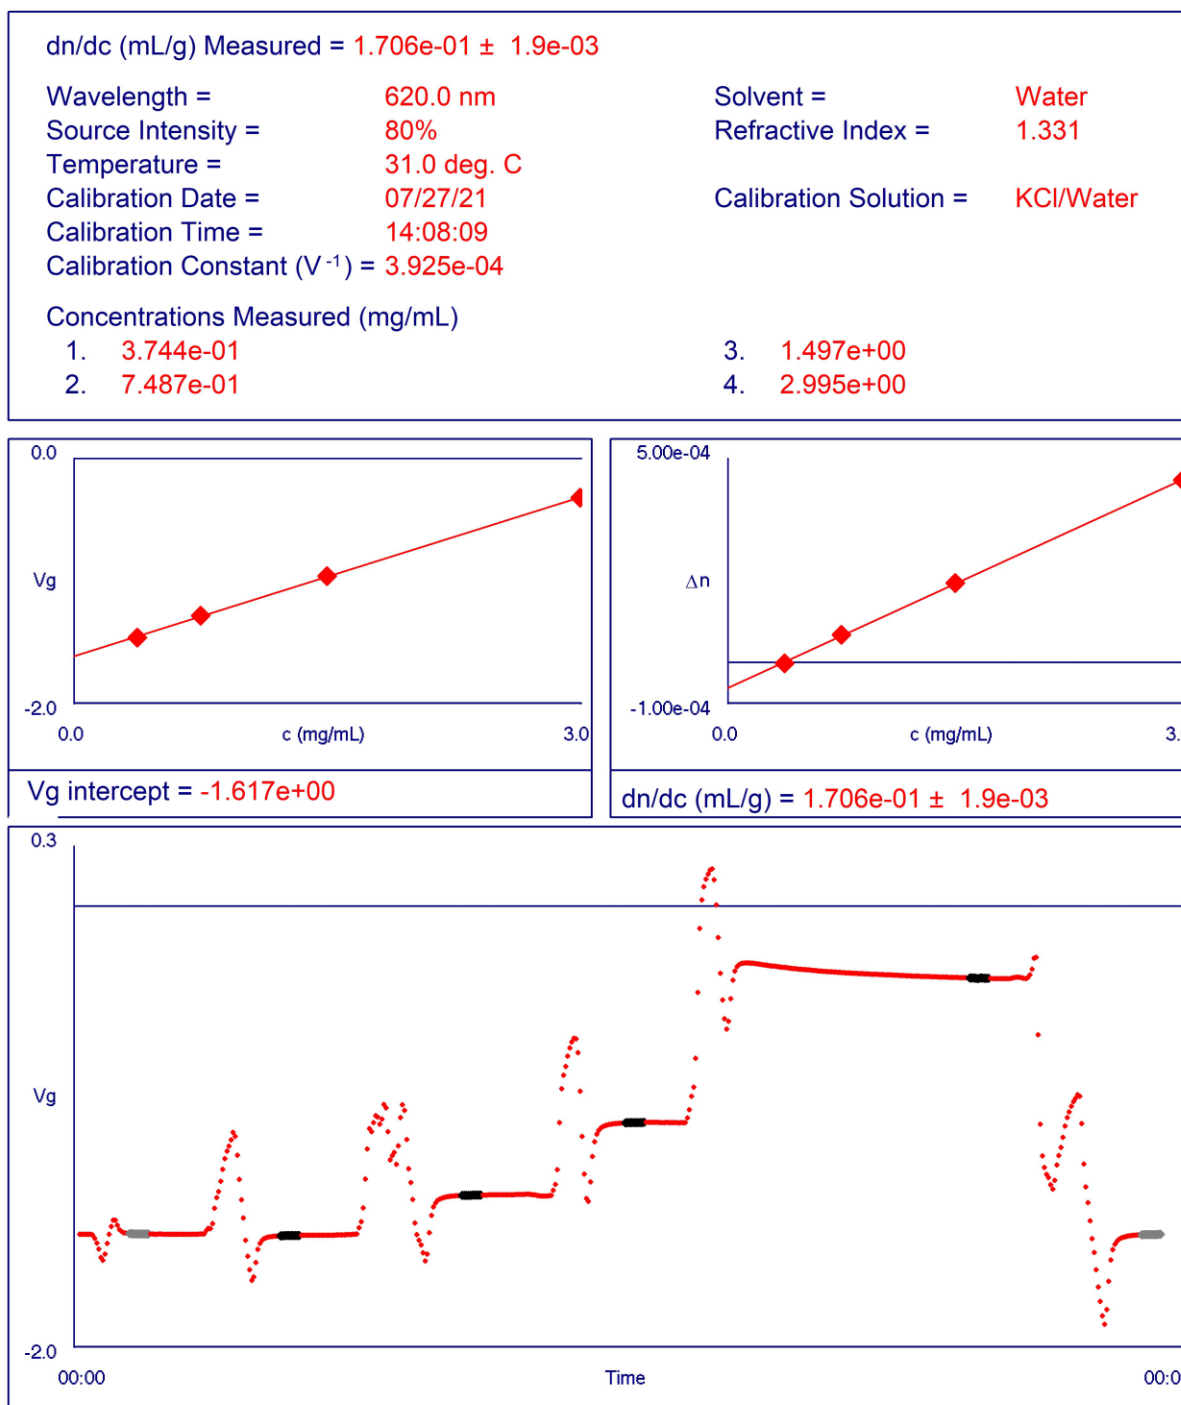

**Figure S63.** Refractive index increment (dn/dc) measurement report of **E1 (pDEA)** in PBS





Brookhaven Instruments Corp.  
Differential Refractometer Software Ver. 5.32

Date: Jul 29, 2021  
Time: 11:55:03

Sample ID **E2, PBS**

Operator ID **PC**

Notes

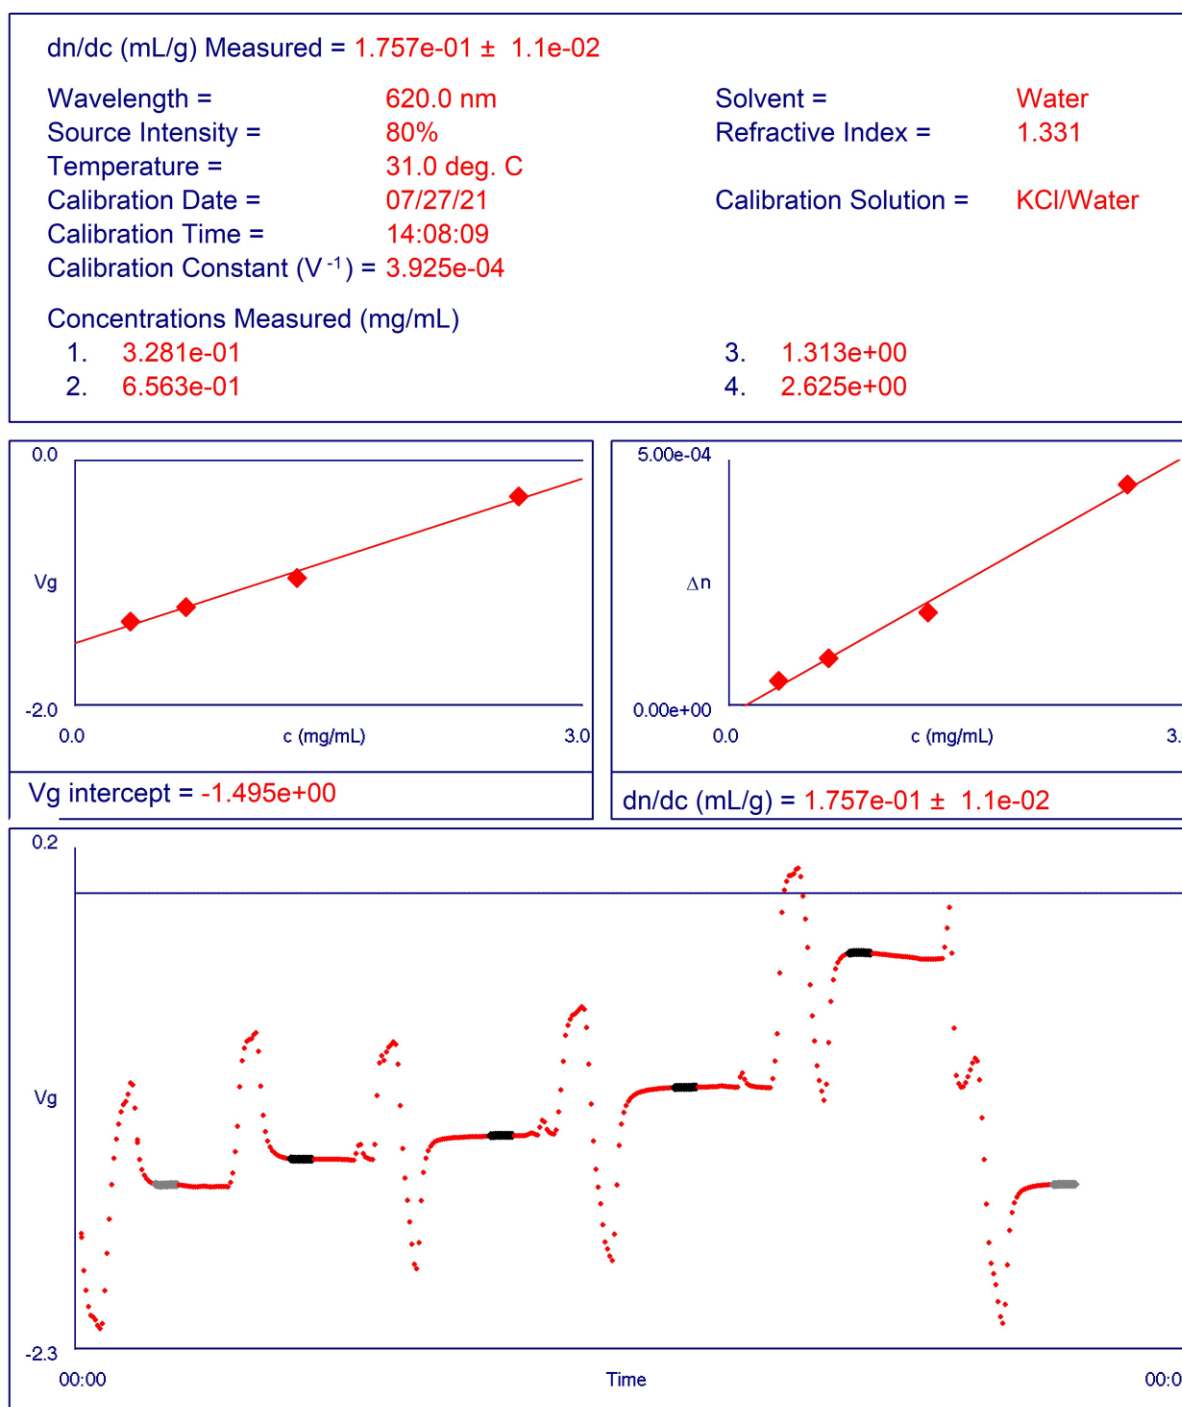

**Figure S64.** Refractive index increment ( $dn/dc$ ) measurement report of **E2 (pDEA)** in PBS

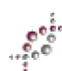

Brookhaven Instruments Corp.  
Differential Refractometer Software Ver. 5.32

Date: Jul 30, 2021  
Time: 11:18:11

Sample ID **E3, PBS**

Operator ID **PC**

Notes

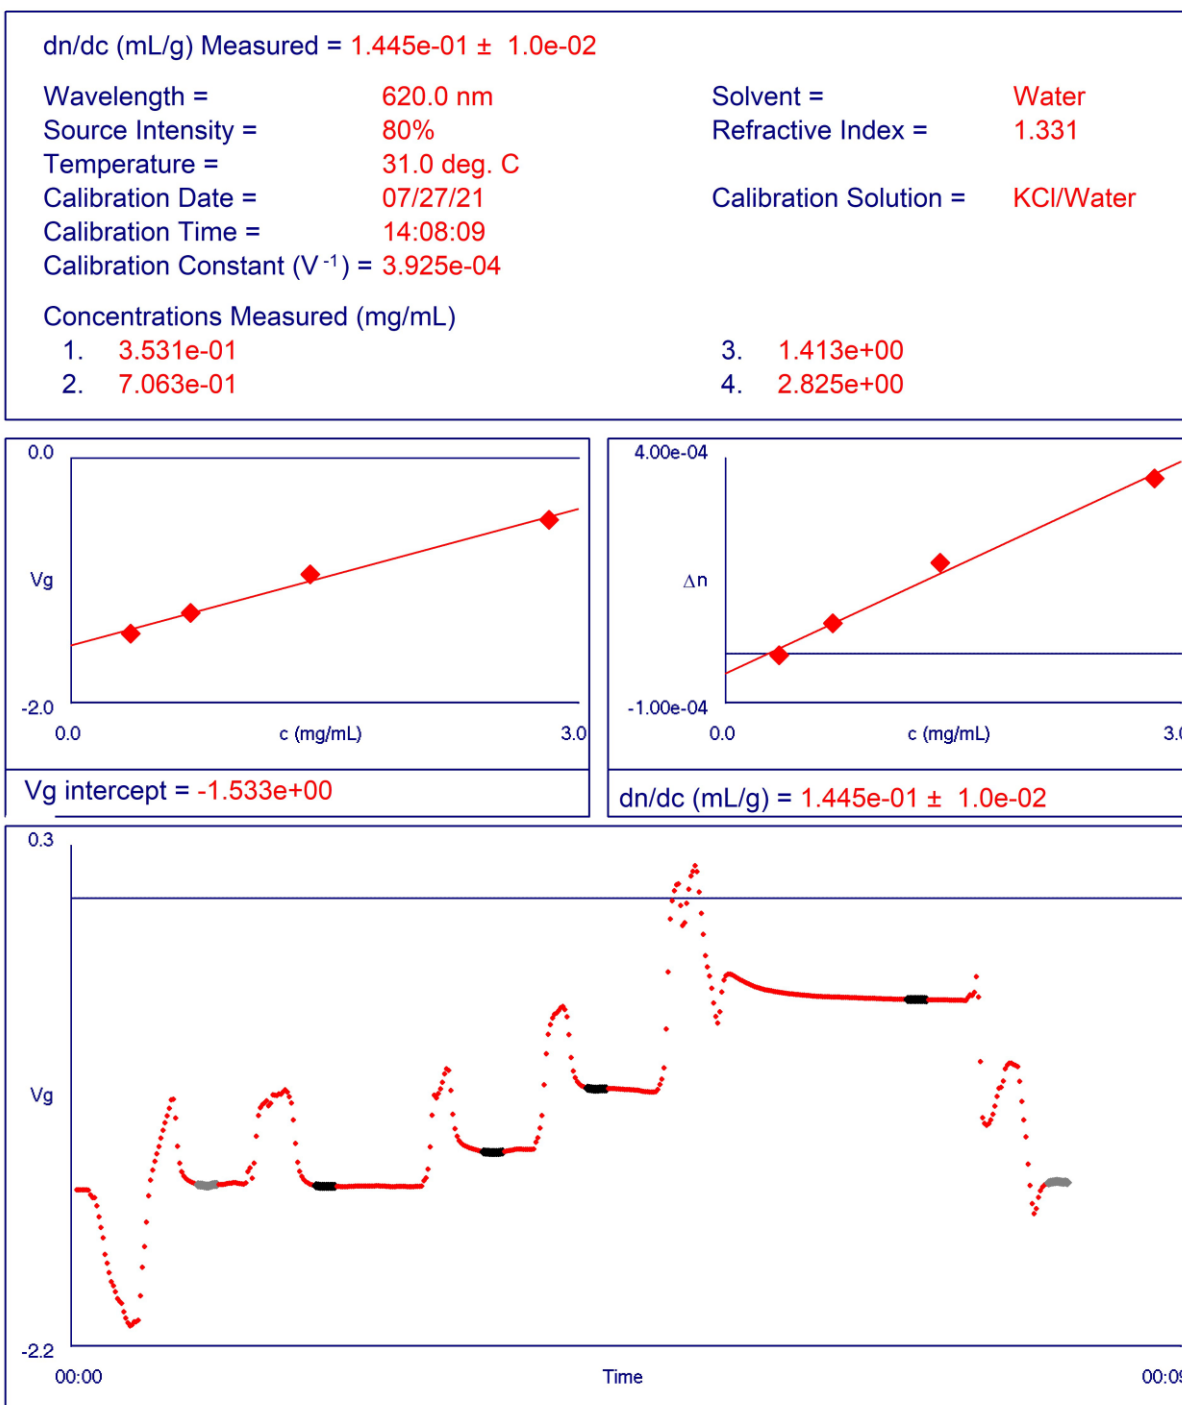

**Figure S65.** Refractive index increment (dn/dc) measurement report of **E3 (pDEA)** in PBS

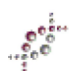

Brookhaven Instruments Corp.  
Differential Refractometer Software Ver. 5.32

Date: Jul 30, 2021  
Time: 11:28:37

Sample ID **P1, PBS**

Operator ID **PC**

Notes

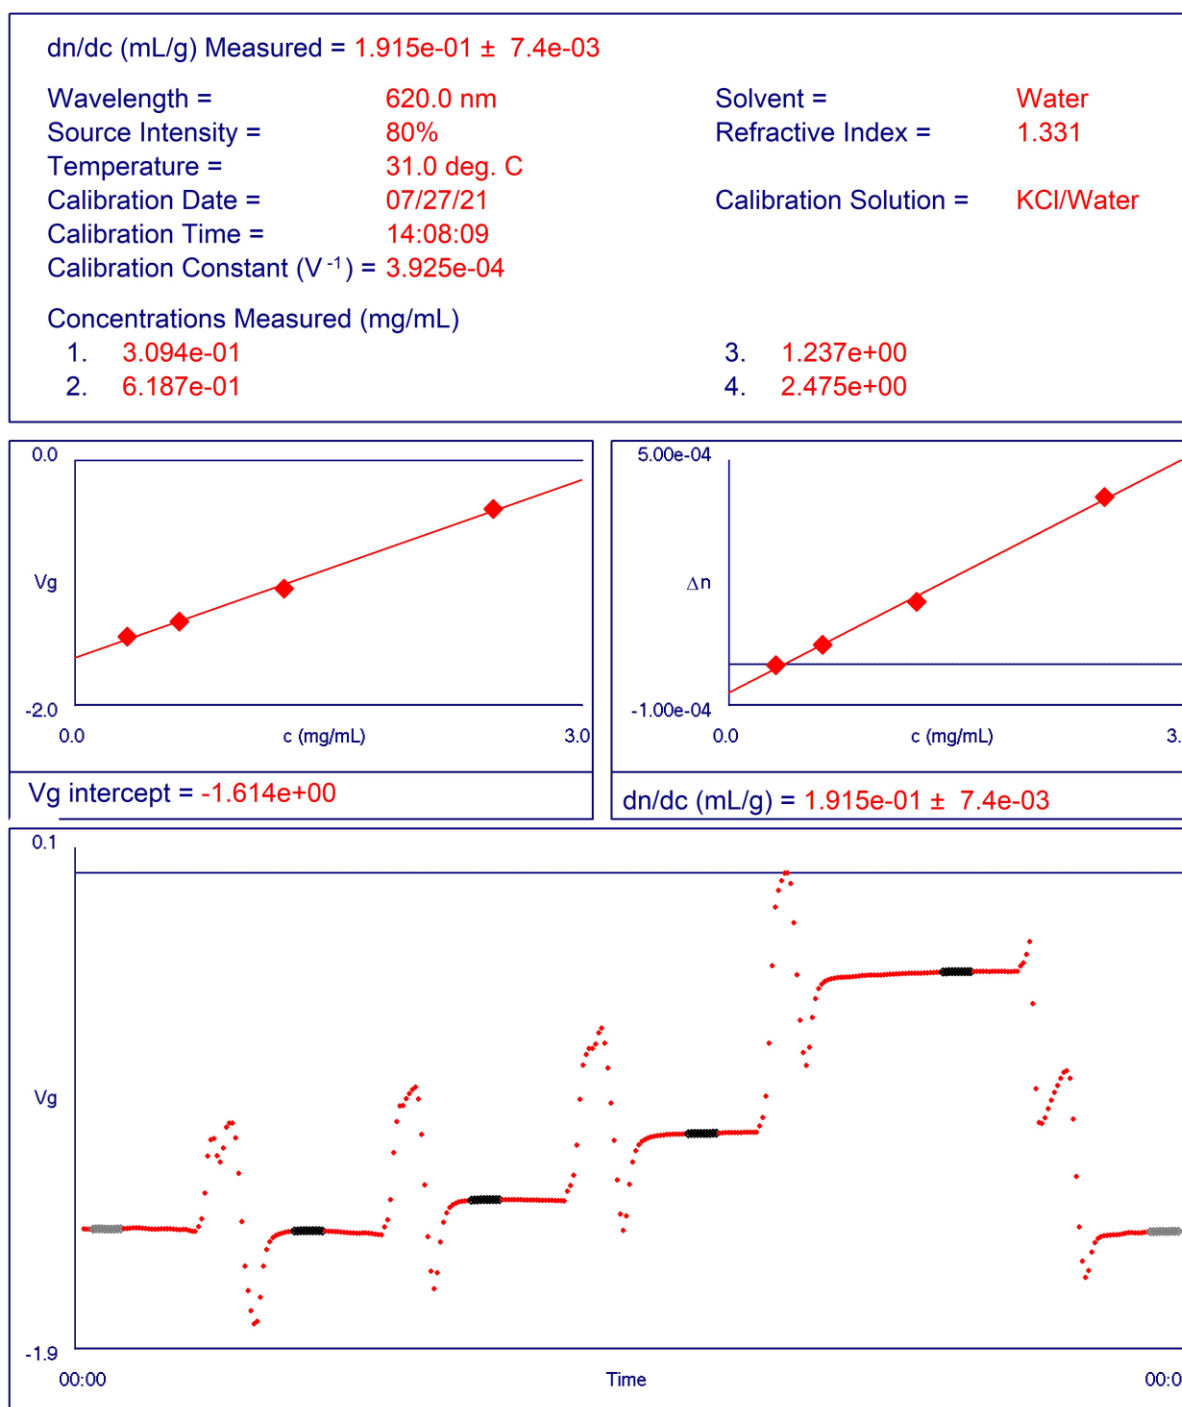

**Figure S66.** Refractive index increment ( $dn/dc$ ) measurement report of **P1 (pAP)** in PBS

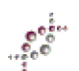

Brookhaven Instruments Corp.  
Differential Refractometer Software Ver. 5.32

Date: Jul 29, 2021  
Time: 12:59:10

Sample ID **P2, PBS**

Operator ID **PC**

Notes

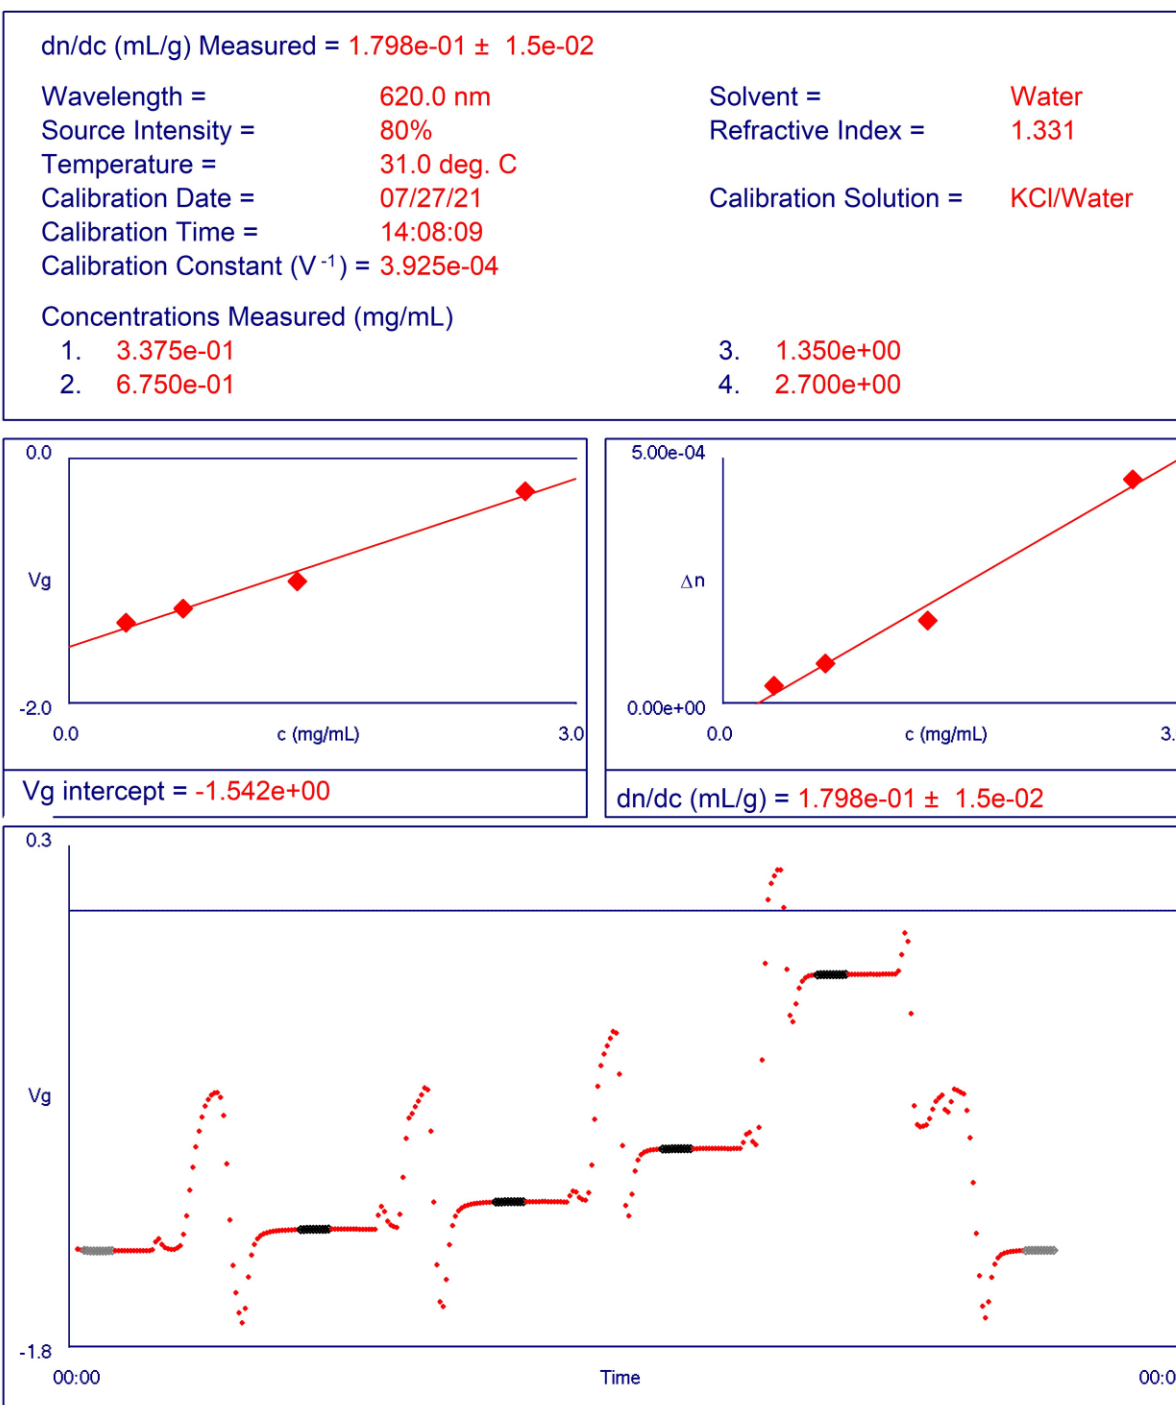

**Figure S67.** Refractive index increment ( $dn/dc$ ) measurement report of **P2 (pAP)** in PBS

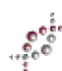

Brookhaven Instruments Corp.  
Differential Refractometer Software Ver. 5.32

Date: Jul 29, 2021  
Time: 13:05:54

Sample ID **P3, PBS**

Operator ID **PC**

Notes

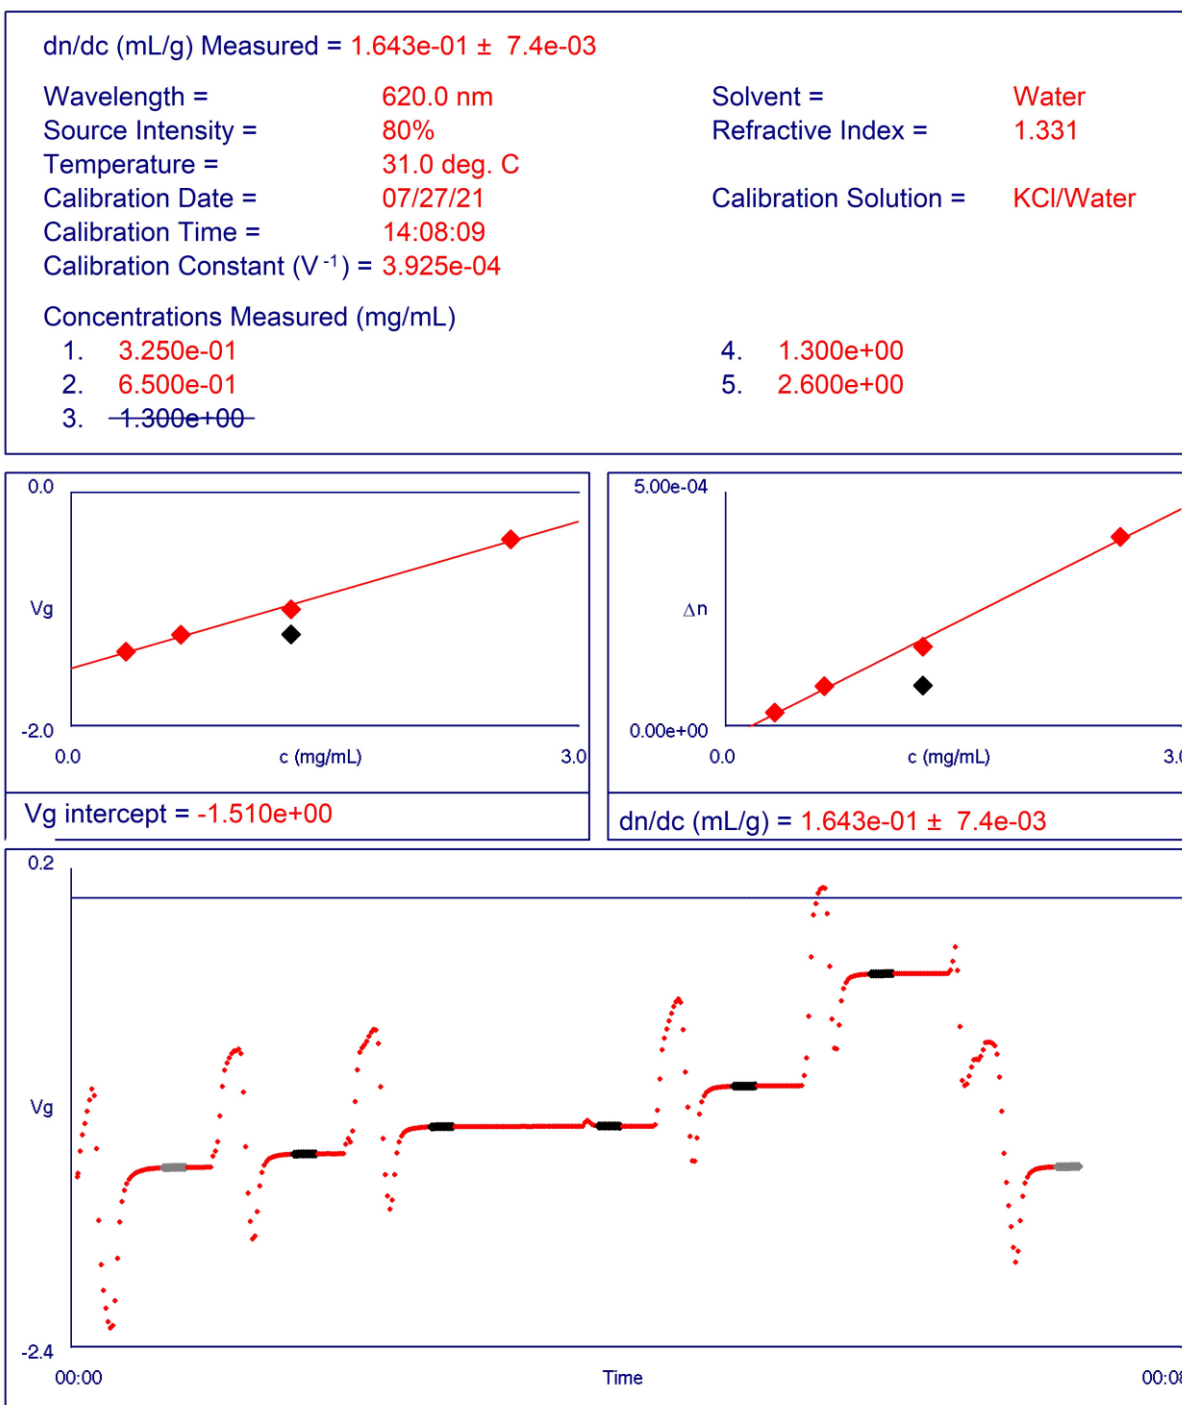

**Figure S68.** Refractive index increment ( $dn/dc$ ) measurement report of **P2 (pAP)** in PBS

## S10. Additional information

### S10.1. Heating/cooling cycles of turbidimetry

Some polymers (particularly **pDFEA** and **pDEA**) tend to coalesce into large particles, which may sink, float, or stick to the cuvette. Coalescence is observed in some heating cycles (see, *e.g.*, **Figure S30**): initially small polymer aggregates are formed, and transmittance decreases. However, upon further heating, these small polymer aggregates may coalesce into large assemblies and (in some cases) move out of the detection area. As a result, transmittance increases again. In some samples, the coalesced assemblies occasionally and temporarily obscure the light beam and thus cause fluctuations in transmittance (caused by sample stirring).

Coalescence and polymer sticking/ floating do not prevent us from determining  $T_{CP}$  in the heating cycle:  $T_{CP}$  is defined by the initial polymer aggregation. For this reason, such a  $T_{CP}$  measurement is well reproducible (inter-run variation was mostly within 0.2 °C; see **Figure 3**). Conversely,  $T_{CP}$  measurements during the cooling cycle were unreliable – the polymer may behave as intended but may also float away from the laser beam or stick to the glass and thus hinder proper reading (the  $T_{CP}$  values in the cooling cycle varied more than 15 °C). We were unsure whether transmittance increased because the polymer aggregates dissolved or because they moved away from the light beam. Therefore, we decided to disregard these values and focus only on the  $T_{CP}$  determined during the heating cycle. The cooling cycle in turbidimetry was used merely as a regeneration phase for subsequent heating cycles; the samples remained at 10 °C for 30 minutes, which reliably ensured that all residual polymer aggregates dissolved.

### S10.2. Structure-to-properties relationship

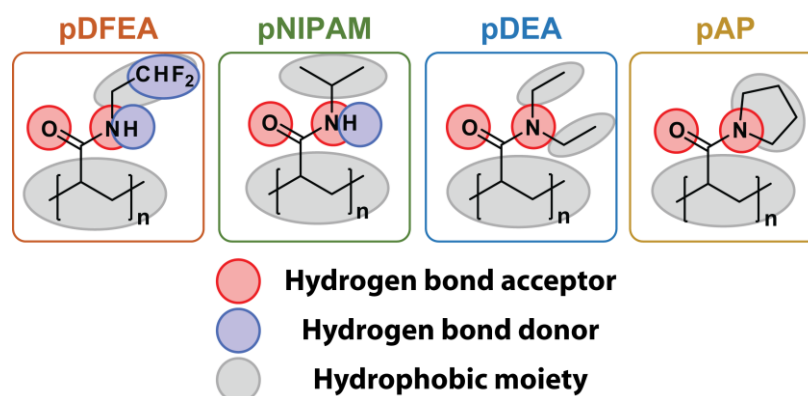

**Scheme S2.** Hydrogen bond acceptors, donors, and hydrophobic moieties in the molecules.

Zhao *et al.*<sup>S19</sup> suggested, that LCST-type thermoresponsive polymers must be hydrophilic (negative  $\Delta H_m$ ) and that the entropy of mixing ( $\Delta S_m$ ) must be negative as well (see **Scheme S3**).  $T_{CP}$  can then be calculated according to **Equation 1**.

$$T_{CP} = \frac{\Delta H_m}{\Delta S_m} \quad (1)$$

The  $\Delta H_m$  of a polymer correlates with its hydrophilicity. Some researchers rank the hydrophilicity of polymers according to their  $T_{CP}$ .<sup>S20</sup> Therefore, the rank of hydrophobicity of the study polymers would be as follows:

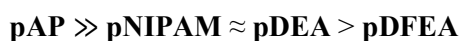

Nevertheless, this approach is most suitable for ranking hydrophilicity of *similar* copolymers (*i.e.* those with *similar* molecular moieties, *e.g.* alkyls). However, **pDFEA** contains -CF<sub>2</sub>H moiety, which is somewhat lipophilic, but can also form hydrogen bonds,<sup>S14</sup> decreasing the enthalpy of aggregation and

potentially lowering the  $T_{CP}$ . Therefore, we chose a different approach to rank the hydrophilicity of the polymers.

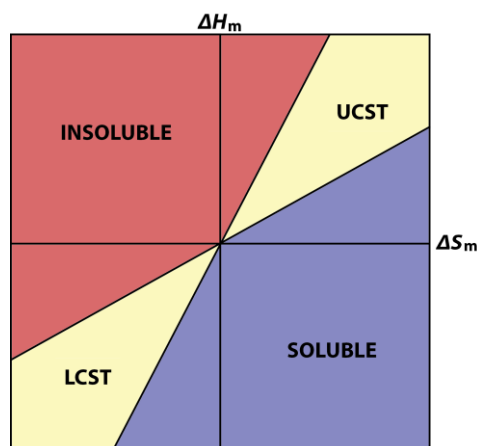

**Scheme S3.** A thermodynamic map showing the solubility and solution properties of polymers in water, redrawn according to [S19].

Zhao *et al.*<sup>S19</sup> suggests ranking the hydrophilicity of polymers according to the enthalpy of mixing ( $\Delta H_m$ ) of the alkanes (corresponding to the hydrophobic moiety) with water. We were unable to find mixing enthalpy of 1,1-difluoroethane with water in the literature, but the mixing enthalpy should inversely correlate with the solubility of the corresponding alkanes in water, enabling us to estimate the ranks of hydrophilicities of study polymers. The concentration of saturated 1,1-difluoroethane aqueous solution is 50 to 80 mmol/l (0 °C),<sup>S21,S22</sup> ethane 4.2 mmol/l (0 °C),<sup>S22</sup> propane 3.5 mmol/l (4 °C),<sup>S22</sup> and butane 3.1 mmol/l (3 °C).<sup>S22</sup> In this approach, we consider only the “hydrophilicity” of the substituent, and we disregard the effect of ligands on the hydrophilicity of the rest of the acrylamide (due to changes of electron densities on NH). Because 1,1-difluoroethane has (by far) the highest aqueous solubility of all corresponding alkanes, we rank **pDFEA** as the most hydrophilic (contrary to the rank suggested by method in [S20]). Both **pDEA** and **pAP** are di-substituted acrylamides; therefore, we rank them as the least hydrophilic. The cyclic structure of the **pAP** side chain will, however, be more compact, thereby shielding the hydrophilic amide less and being more hydrophilic than **pDEA**. This approach would suggest the following rank of hydrophilicities of polymers: <sup>note1</sup>

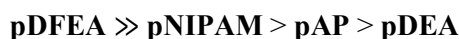

As shown in the ITC results, **pDFEA** has strong intramolecular interactions, which decrease the aggregation enthalpy, possibly due to its intramolecular hydrogen bonds.<sup>S14</sup> These hydrogen bonds may explain the strong interactions of **pDFEA** with proteins as well.

The  $\Delta S_m$  is hard to estimate from commonly available material quantities as it is strongly related to the release of ‘high energy’ hydrating water molecules. In line with this statement, the more hydrophilic **pAP** has a higher  $T_{CP}$  as **pDEA** as the hydration  $\Delta S_m$  will be similar based on the presence of a tertiary amide (**Scheme S2**). Despite the higher hydrophilicity of **pNIPAM** and **pDFEA**, these polymers have a lower  $T_{CP}$  than **pAP**, which can be ascribed to the higher  $\Delta S_m$  resulting from a more efficient hydration thanks to the secondary amide groups (both **pNIPAM** and **pDFEA**) and to the difluoroalkyl group (**pDFEA**).

<sup>note 1</sup> **pDEA** contains two ethyls; therefore, it is considered less hydrophilic than **pNIPAM**. Its monoethyl analogue (poly(ethyl-*N*-acrylamide)) would be more hydrophilic than **pNIPAM**; and its  $T_{CP}$  is  $\approx 73$  °C.<sup>S19</sup>

### S10.3. Detection of terminal moiety

Detecting these terminal moieties in polymers with  $M_w$  around/ above 25 kg/mol is notoriously difficult because of their very low content, broad peaks, noise and trace contaminants (see NMR spectra in ESI).<sup>S23</sup> The terminal  $\text{CH}_3\text{O}$  moiety provides  $^1\text{H}$  NMR signals at  $\approx 3.5$ – $3.6$  ppm, and  $-\text{CH}_2\text{CH}_2-$  (from acrylate) provides NMR signals at 2.6 to 2.8 ppm.<sup>S5,S24</sup> Unfortunately, these signals are often partly masked by broad peaks from solvents or polymers ( $\text{NCH}_2$ , 3.2 to 3.9 ppm; acrylamide peak at  $\approx 2.3$  ppm; see NMR spectra in ESI). Nevertheless, we remeasured  $^1\text{H}$  NMR spectra of all polymers in higher concentrations and with a higher number of scans (256 scans), now added to ESI as raw files (available for inspection). We were able to detect signals of terminal  $-\text{CH}_2\text{CH}_2-$ , most pronounced in polymers **F1** and **P1**, where the content of end-moiety is the highest and the end-moiety signals are not masked by polymer signals (**Figure S69**). Therefore, the signals of terminal  $-\text{CH}_2\text{CH}_2-$  serve as an indirect evidence of terminal  $-\text{CH}_2\text{CH}_2\text{COOCH}_3$  moiety. The remaining peaks in this region can be attributed to low-molecular weight contaminants (mostly solvents; their peaks are narrow, but the overall integral is low).

We measured  $^1\text{H}$ -NMR spectra in MeOH-4d solutions because polymers dissolve in MeOH, whose residual peak is found at 3.31 ppm, whereas the peak of water is at 4.78 ppm;<sup>S9</sup> therefore, MeOH does not mask these terminal peaks. DMSO-6d has a peak at 2.50 ppm, and water has a peak at 3.33 ppm; thus, the peaks of these solvents would mask the peaks of interest.<sup>9</sup>

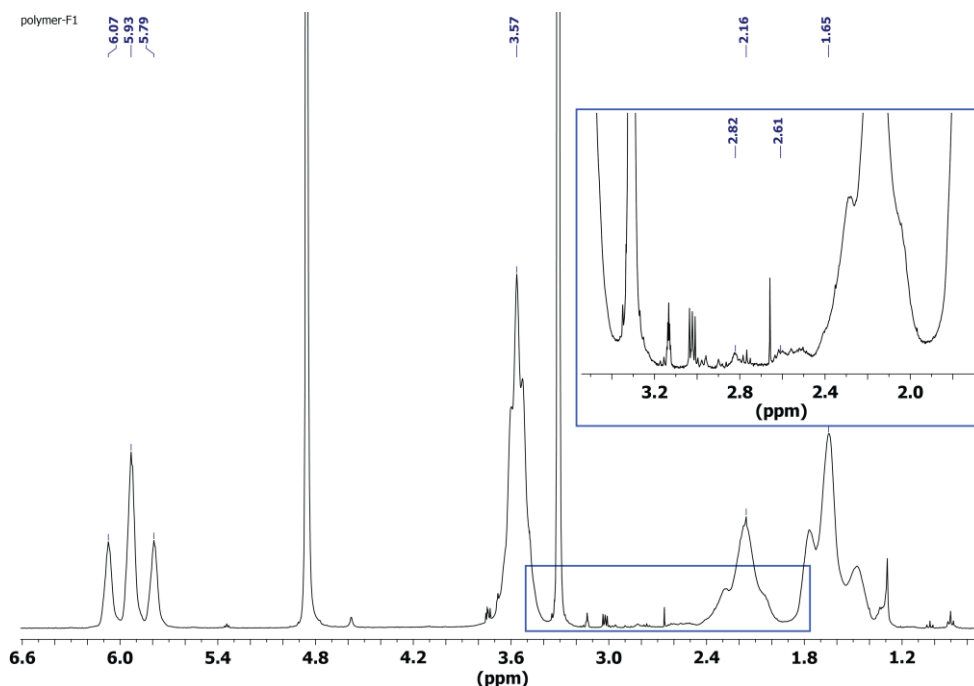

**Figure S69.**  $^1\text{H}$  NMR of polymer **F1** in MeOH-4d showing the peaks at 2.6 and 2.8 ppm, corresponding to terminal  $\text{CH}_2\text{CH}_2$  moieties.<sup>S5,S24</sup> The  $\text{CH}_3\text{O}-$  moiety remained masked by other peaks.



**S11. List of used abbreviations and symbols**

| <b>Abbreviation</b>                          | <b>Explanation</b>                                                                                                                 |
|----------------------------------------------|------------------------------------------------------------------------------------------------------------------------------------|
| $^1\text{H}$ NMR                             | $^1\text{H}$ nuclear magnetic resonance                                                                                            |
| $^1\text{H}$ - $^{13}\text{C}$ HSQC-edit NMR | $^1\text{H}$ - $^{13}\text{C}$ multiplicity edited, heteronuclear single quantum coherence spectroscopy nuclear magnetic resonance |
| $^{13}\text{C}\{^1\text{H}\}$ NMR            | $^{13}\text{C}$ nuclear magnetic resonance with $^1\text{H}$ decoupling                                                            |
| $^{19}\text{F}$ NMR                          | $^{19}\text{F}$ nuclear magnetic resonance                                                                                         |
| ACVA                                         | 4,4'-[(E)-diazenediyl]bis(4-cyanopentanoic acid)                                                                                   |
| $c_x$                                        | molar concentration of compound x                                                                                                  |
| <i>ca.</i>                                   | <i>circa</i> , approximately                                                                                                       |
| Corp.                                        | corporation                                                                                                                        |
| CPT                                          | cloud point temperature                                                                                                            |
| CTA                                          | chain transfer agent                                                                                                               |
| CA                                           | California, state of the USA                                                                                                       |
| D                                            | content of deuterium of all hydrogen atoms ( <i>e.g.</i> 'in 99.80% D')                                                            |
| d                                            | doublet (in NMR)                                                                                                                   |
| dd                                           | doublet of doublets (in NMR)                                                                                                       |
| ddd                                          | doublet of doublets of doublets (in NMR)                                                                                           |
| $dn/dc$                                      | specific refractive index increment                                                                                                |
| DLS                                          | dynamic light scattering                                                                                                           |
| DMF                                          | dimethylformamide                                                                                                                  |
| DSC                                          | differential scanning calorimetry                                                                                                  |
| DMSO                                         | dimethyl sulfoxide                                                                                                                 |
| DMSO-6d                                      | perdeuterated dimethyl sulfoxide                                                                                                   |
| <b>E</b>                                     | poly[( <i>N,N</i> -diethyl)acrylamide]                                                                                             |
| <b>E<sub>1</sub></b>                         | poly[( <i>N,N</i> -diethyl)acrylamide], lowest $M_w$ (see <b>Table 1</b> )                                                         |
| <b>E<sub>2</sub></b>                         | poly[( <i>N,N</i> -diethyl)acrylamide], medium $M_w$ (see <b>Table 1</b> )                                                         |
| <b>E<sub>3</sub></b>                         | poly[( <i>N,N</i> -diethyl)acrylamide], highest $M_w$ (see <b>Table 1</b> )                                                        |
| <b>F</b>                                     | poly[( <i>N</i> -2,2-difluoroethyl)acrylamide]                                                                                     |
| <b>F<sub>1</sub></b>                         | poly[( <i>N</i> -2,2-difluoroethyl)acrylamide], lowest $M_w$ (see <b>Table 1</b> )                                                 |
| <b>F<sub>2</sub></b>                         | poly[( <i>N</i> -2,2-difluoroethyl)acrylamide], medium $M_w$ (see <b>Table 1</b> )                                                 |
| <b>F<sub>3</sub></b>                         | poly[( <i>N</i> -2,2-difluoroethyl)acrylamide], highest $M_w$ (see <b>Table 1</b> )                                                |
| FBS                                          | foetal bovine serum (fetal bovine serum in US english)                                                                             |
| <i>e.g.</i>                                  | <i>exempli gratia</i> , for example                                                                                                |
| GA UK                                        | Grantová agentura UK (the Charles University Grant Agency)                                                                         |
| HSQC                                         | heteronuclear single quantum coherence spectroscopy                                                                                |
| <b>I</b>                                     | poly[( <i>N</i> -isopropyl)acrylamide]                                                                                             |
| <b>I<sub>1</sub></b>                         | poly[( <i>N</i> -isopropyl)acrylamide], lowest $M_w$ (see <b>Table 1</b> )                                                         |
| <b>I<sub>2</sub></b>                         | poly[( <i>N</i> -isopropyl)acrylamide], medium $M_w$ (see <b>Table 1</b> )                                                         |
| <b>I<sub>3</sub></b>                         | poly[( <i>N</i> -isopropyl)acrylamide], highest $M_w$ (see <b>Table 1</b> )                                                        |
| <i>i.e.</i>                                  | <i>id est</i> ; that is                                                                                                            |
| Inc.                                         | incorporation; legal concept of company in the USA                                                                                 |
| ITC                                          | isothermal titration calorimetry                                                                                                   |
| <i>J</i>                                     | spin-spin coupling constant (J-coupling constant, spin-spin coupling)                                                              |
| LCST                                         | lower critical solution temperature                                                                                                |
| LFT                                          | lattice fluid theory                                                                                                               |
| LFT-HB                                       | lattice fluid theory with hydrogen bonding correction                                                                              |
| NMR                                          | nuclear magnetic resonance                                                                                                         |
| m                                            | multiplet (in NMR)                                                                                                                 |
| $m_x$                                        | mass of compound x                                                                                                                 |

| Abbreviation         | Explanation                                                                 |
|----------------------|-----------------------------------------------------------------------------|
| MA                   | Massachusetts, state of the USA                                             |
| MALS                 | multiangle light scattering                                                 |
| MeHQ                 | 4-methoxyphenol (mequinol, 4-hydroxyanisole)                                |
| MeOH                 | methanol                                                                    |
| MeOH-4d              | perdeuterated methanol                                                      |
| MiliQ/MilliQ water   | ultrapure water                                                             |
| $M_n$                | number-average molar mass                                                   |
| $M_w$                | weight-average molar mass                                                   |
| $n$                  | refractive index                                                            |
| $n_x$                | molar amount of compound x                                                  |
| N/A                  | not applicable (not available)                                              |
| No.                  | number                                                                      |
| NY                   | New York, state of the USA                                                  |
| norm.                | normalized                                                                  |
| <b>P</b>             | poly[( <i>N</i> -acryloyl)pyrrolidine]                                      |
| <b>P<sub>1</sub></b> | poly[( <i>N</i> -acryloyl)pyrrolidine], lowest $M_w$ (see <b>Table 1</b> )  |
| <b>P<sub>2</sub></b> | poly[( <i>N</i> -acryloyl)pyrrolidine], medium $M_w$ (see <b>Table 1</b> )  |
| <b>P<sub>3</sub></b> | poly[( <i>N</i> -acryloyl)pyrrolidine], highest $M_w$ (see <b>Table 1</b> ) |
| PDI                  | (poly)dispersity index ( $D_M = M_w/M_n$ )                                  |
| pH                   | potential of hydrogen                                                       |
| <b>pAP</b>           | poly[( <i>N</i> -acryloyl)pyrrolidine]                                      |
| PBS                  | phosphate saline buffer                                                     |
| <b>pDfEA</b>         | poly[( <i>N</i> -2,2-difluoroethyl)acrylamide]                              |
| <b>pDEA</b>          | poly[( <i>N,N</i> -diethyl)acrylamide]                                      |
| <b>pNIPAM</b>        | poly[( <i>N</i> -isopropyl)acrylamide]                                      |
| ppm                  | parts per million                                                           |
| PrNH <sub>2</sub>    | propylamine, <i>n</i> -propylamine                                          |
| ®                    | registered trademark (Lanham Trademark Act of 1946)                         |
| RI                   | refractive index                                                            |
| RT                   | room temperature                                                            |
| rpm                  | revolutions per minute                                                      |
| RAFT                 | reversible addition–fragmentation chain-transfer polymerisation             |
| SAXS                 | small-angle X-ray scattering                                                |
| SD                   | standard deviation                                                          |
| SEC                  | size exclusion chromatography                                               |
| s.r.o.               | private limited company in legal structure of the Czech Republic            |
| $T_{CP}$             | cloud point temperature                                                     |
| t                    | triplet (in NMR)                                                            |
| TCEP                 | 3,3',3''-phosphanetriyltripropanoic acid                                    |
| THF                  | tetrahydrofuran; oxolane                                                    |
| ™                    | unregistered trademark symbol (Lanham Trademark Act of 1946)                |
| tt                   | triplet of triplets (in NMR)                                                |
| tdd                  | triplet of doublets of doublet (in NMR)                                     |
| UK                   | United Kingdom of Great Britain and Northern Ireland                        |
| USA                  | United States of America                                                    |
| UV-vis               | ultraviolet/visible light                                                   |
| $V_x$                | volume of compound x                                                        |
| v/v                  | volume fraction, volume per volume                                          |
| WA                   | Washington, state of the USA                                                |

**Abbreviation**

WAXS

 $\Delta H$  $\Delta H_m$  $\Delta S_m$  $\bar{D}_M$  $\lambda$ **Explanation**

wide-angle X-ray scattering

change of enthalpy

mixing enthalpy

mixing entropy

dispersity index, defined as  $M_w/M_n$ 

wavelength

## S12. Author contributions and Contributor Roles Taxonomy (CRediT)

### S12.1. Contributor Roles Taxonomy (CRediT)

**Kristýna Kolouchová (K.K.)** - Investigation, Methodology, Data curation, Writing – original draft, Writing – review & editing, Visualization, Project administration

**Volodymyr Lobaz (V.L.)** - Investigation, Methodology, Validation, Formal analysis, Writing – original draft, Data curation

**Hynek Beneš (H.B.)** - Investigation, Methodology, Data curation

**Victor R. de la Rosa (V.R.R.)** - Investigation, Methodology, Writing – review & editing

**David Babuka (D.B.)** - Investigation, Methodology, Data curation, Software

**Pavel Švec (P.Šv.)** - Validation, Data curation, Methodology, Writing – review & editing

**Peter Černoch (P.Č.)** - Investigation

**Martin Hrubý (M.H.)** - Resources, Validation, Funding acquisition, Writing – review & editing

**Richard Hoogenboom (R.H.)** - Validation, Methodology, Writing – review & editing, Resources, Funding acquisition, Supervision

**Petr Štěpánek (P.Št.)** – Validation, Methodology, Writing – review & editing

**Ondřej Groborz (O.G.)** – Conceptualization, Supervision, Methodology, Data curation, Investigation, Formal analysis, Visualization, Project administration, Writing – original draft, Writing – review & editing, Funding acquisition, Resources, Software

### S12.2. Author contributions

O.G. conceived the presented idea, K.K. synthesized the monomers, K.K., O.G. synthesized, modified, purified, and characterized the polymers (SEC, NMR). K.K. and V.R.R. measured and evaluated  $T_{CP}$  as a function of polymer temperature. V.L. and H.B. measured and evaluated calorimetry data. D.B. collected and evaluated DLS. P.Č. measured the  $dn/dc$  of study polymers. K.K., O.G., V.L., R.H., P.Št., M.H., D.B., H.B., and P.Šv. were involved in methodology design. K.K., O.G., V.L., R.H., P.Št., M.H., D.B., H.B., and P.Šv. evaluated the measured data; O.G., K.K., and R.H. have proposed the study strategies, validated data, and formulated the conclusions of the study. M.H., R.H., O.G. and P.Št. and have secured the resources for this study, M.H., O.G. and R.H. have secured its funding. O.G. supervised the project, K.K. and O.G. controlled the project management and administration. O.G. and K.K. wrote major parts of the manuscript, R.H., V.R.R., P.Šv, M.H., and P.Št. wrote and/ or reviewed parts of the manuscript.

### S13. Additional supplementary files

Processed dynamic light scattering data (DLS data; size of polymer assemblies as a function of solution temperature) can be found in **d1py00843a1.rar** file on the **web of the journal**.

Both processed and non-processed NMR spectra of all polymers can be found in **d1py00843a2.rar** file on the **web of the journal**. The file contains  $^1\text{H}$ ,  $^{13}\text{C}\{^1\text{H}\}$ ,  $^{19}\text{F}$ , and  $^1\text{H}$ - $^{13}\text{C}$  multiplicity-edited HSQC NMR spectra of acryloyl pyrrolidine (**AP-monomer**), *N*-(2,2-difluoroethyl)acrylamide (**DFEA-monomer**), poly[(*N*-acryloylpyrrolidine)] (**pAP**), poly[*N*-(2,2-difluoroethyl)acrylamide] (**pDFEA**), poly[(*N*-isopropylacrylamide)] (**pNIPAM**), poly[(*N*-diethylacrylamide)] (**pDEA**) (both processed, as seen in ESI, and non-processed data files). Additionally, this file contains  $^1\text{H}$  NMR raw spectra of all polymers.

Processed size exclusion chromatograms (SEC traces) can be found in **d1py00843a4.rar** file on the **web of the journal**.

**S14. References**

- S1 K. Tanaka, Y. Hagiwara and K. Noguchi, Rhodium-Catalyzed Regio- and Enantioselective Intermolecular [4+2] Carbocyclization of 4-Alkynals with *N,N*-Dialkyl Acrylamides, *Angew. Chem. Int. Ed.*, 2005, **44**, 7260–7263, 10.1002/anie.200502380
- S2 J. M. Bak, K.-B. Kim, J.-E. Lee, Y. Park, S. S. Yoon, H. M. Jeong and H. Lee, Thermoresponsive fluorinated polyacrylamides with low cytotoxicity, *Polym. Chem.*, 2013, **4**, 2219–2223, 10.1039/C2PY20747H
- S3 J. Chiefari, Y. K. (Bill) Chong, F. Ercole, J. Krstina, J. Jeffery, T. P. T. Le, R. T. A. Mayadunne, G. F. Meijs, C. L. Moad, G. Moad, E. Rizzardo and S. H. Thang, Living Free-Radical Polymerization by Reversible Addition–Fragmentation Chain Transfer: The RAFT Process, *Macromolecules*, 1998, **31**, 5559–5562, 10.1021/ma9804951
- S4 A. D. McNaught and A. Wilkinson, *IUPAC. Compendium of Chemical Terminology*, Blackwell Scientific Publications, Oxford, 2nd ed., 1997, 10.1351/goldbook
- S5 C. Zhou, M. A. Hillmyer and T. P. Lodge, Micellization and Micellar Aggregation of Poly(ethylene-*alt*-propylene)-*b*-poly(ethylene oxide)-*b*-poly(*N*-isopropylacrylamide) Triblock Terpolymers in Water, *Macromolecules*, 2011, **44**, 1635–1641, 10.1021/ma102786q
- S6 J. A. Burns, J. C. Butler, J. Moran and G. M. Whitesides, Selective Reduction of Disulfides by Tris(2-carboxyethyl)phosphine, *J. Org. Chem.*, 1991, **56**, 2648–2650, 10.1021/jo00008a014
- S7 J. Schleucher, M. Schwendinger, M. Sattler, P. Schmidt, O. Schedletzky, S. J. Glaser, O. W. Sørensen and C. Griesinger, A general enhancement scheme in heteronuclear multidimensional NMR employing pulsed field gradients, *J. Biomol. NMR*, 1994, **4**, 301–306, 10.1007/BF00175254
- S8 L. Kay, P. Keifer and T. Saarinen, Pure absorption gradient enhanced heteronuclear single quantum correlation spectroscopy with improved sensitivity, *J. Am. Chem. Soc.*, 1992, **114**, 10663–10665, 10.1021/ja00052a088
- S9 H. E. Gottlieb, V. Kotlyar and A. Nudelman, NMR Chemical Shifts of Common Laboratory Solvents as Trace Impurities, *J. Org. Chem.*, 1997, **62**, 7512–7515, 10.1021/jo971176v
- S10 R. Dulbecco and M. Vogt, Plaque formation and isolation of pure lines of poliomyelitis viruses, *J. Exp. Med.*, 1954, **99**, 167–182, 10.1084/jem.99.2.167
- S11 Q. Zhang, C. Weber, U. S. Schubert and R. Hoogenboom, Thermoresponsive polymers with lower critical solution temperature: from fundamental aspects and measuring techniques to recommended turbidimetry conditions, *Mater. Horiz.*, 2017, **4**, 109–116, 10.1039/C7MH00016B
- S12 J. Jakeš, Regularized Positive Exponential Sum (REPES) Program - A Way of Inverting Laplace Transform Data Obtained by Dynamic Light Scattering, *Collect. Czechoslov. Chem. Commun.*, 1995, **60**, 1781–1797, 10.1135/cccc19951781
- S13 T. Wiseman, S. Williston, J. F. Brandts and L.-N. Lin, Rapid measurement of binding constants and heats of binding using a new titration calorimeter, *Anal. Biochem.*, 1989, **179**, 131–137, 10.1016/0003-2697(89)90213-3
- S15 Y. Zafrani, D. Yeffet, G. Sod-Moriah, A. Berliner, D. Amir, D. Marciano, E. Gershonov and S. Saphier, Difluoromethyl Bioisostere: Examining the “Lipophilic Hydrogen Bond Donor” Concept, *J. Med. Chem.*, 2017, **60**, 797–804, 10.1021/acs.jmedchem.6b01691
- S16 C. Zhao, Z. Ma and X. X. Zhu, Rational design of thermoresponsive polymers in aqueous solutions: A thermodynamics map, *Prog. Polym. Sci.*, 2019, **90**, 269–291, 10.1016/j.progpolymsci.2019.01.001
- S14 M. M. Bloksma, D. J. Bakker, C. Weber, R. Hoogenboom and U. S. Schubert, The Effect of Hofmeister Salts on the LCST Transition of Poly(2-oxazoline)s with Varying Hydrophilicity, *Macromol. Rapid Commun.*, 2010, **31**, 724–728, 10.1002/marc.200900843
- S17 A. L. Horvath, *Halogenated Hydrocarbons: Solubility-Miscibility with Water*, CRC Press, 1982, 978-0-8247-1166-5
- S18 S. H. Yalkowsky, *Handbook of Aqueous Solubility Data*, CRC Press, 2nd edn., 2003, 978-0-203-49039-6
- S19 J. U. Izunobi and C. L. Higginbotham, Polymer Molecular Weight Analysis by <sup>1</sup>H NMR Spectroscopy, *J. Chem. Educ.*, 2011, **88**, 1098–1104, 10.1021/ed100461v

- S20 X.-P. Qiu and F. M. Winnik, Facile and Efficient One-Pot Transformation of RAFT Polymer End Groups via a Mild Aminolysis/Michael Addition Sequence, *Macromol. Rapid Commun.*, 2006, **27**, 1648–1653, 10.1002/marc.200600436
- S21 D. Babuka, K. Kolouchová, O. Groborz, Z. Tošner, A. Zhigunov, P. Štěpánek and M. Hrubý, Internal Structure of Thermoresponsive Physically Crosslinked Nanogel of poly[*N*-(2-hydroxypropyl)methacrylamide]-block-poly[*N*-(2,2-difluoroethyl)acrylamide], Prominent <sup>19</sup>F MRI Tracer, *Nanomaterials*, 2020, **10**, 2231, 10.3390/nano10112231
- S22 D. Babuka, K. Kolouchova, M. Hruby, O. Groborz, Z. Tosner, A. Zhigunov and P. Stepanek, Investigation of the internal structure of thermoresponsive diblock poly(2-methyl-2-oxazoline)-*b*-poly[*N*-(2,2-difluoroethyl)acrylamide] copolymer nanoparticles, *Eur. Polym. J.*, 2019, **121**, 109306, 10.1016/j.eurpolymj.2019.109306
- S23 K. Kolouchova, O. Sedlacek, D. Jirak, D. Babuka, J. Blahut, J. Kotek, M. Vit, J. Trousil, R. Konefał, O. Janouskova, B. Podhorska, M. Slouf and M. Hruby, Self-Assembled Thermoresponsive Polymeric Nanogels for <sup>19</sup>F MR Imaging, *Biomacromolecules*, 2018, **19**, 3515–3524, 10.1021/acs.biomac.8b00812
- S24 P. Štěpánek, in *Dynamic Light Scattering*, ed. W. Brown, Clarendon Press, Oxford, 1993, p. 760, 978-0-19-853942-1
